# Supplementary material for: Common gene mutations in 103 authenticated colorectal cancer cell lines
Source: Research Square preprint supplement (doi:10.21203/rs.3.rs-6907318/v1), 2025-06-30
Supplement: Supplementary file 1 [file 913133ff01aefaad3287c0e6.xlsx]

## Sheet: Table 1
Table 1. Mutation prevalence of each gene per mutation phenotype
Gene	MSS cell lines* (%), n = 76	MSI cell lines* (%), n = 15	MSS-POLE mutated cell lines (%), n = 5
APC	64 (84)	13 (87)	5 (100)
ARID1A	8 (11)	11 (73)	3 (60)
BRAF	14 (18)	10 (67)	1 (20)
CCND2	0 (0)	1 (7)	1 (20)
CTNNB1	5 (7)	5 (33)	3 (60)
EGFR	3 (4)	2 (13)	2 (40)
ERBB2	1 (1)	3 (20)	1 (20)
FBXW7	15 (20)	5 (33)	5 (100)
JAK1	5 (7)	2 (13)	1 (20)
KRAS	43 (57)	6 (40)	2 (40)
MDM2	0 (0)	2 (13)	2 (40)
MYC	1 (1)	2 (13)	0 (0)
NF1	5 (7)	6 (40)	4 (80)
NRAS	3 (4)	0 (0)	2 (40)
PIK3CA	15 (20)	7 (47)	4 (80)
POLE	0 (0)	0 (0)	5 (100)
PTEN	2 (3)	4 (27)	4 (80)
SMAD2	4 (5)	3 (20)	3 (60)
SMAD4	19 (25)	2 (13)	1 (20)
TP53	64 (84)	6 (40)	4 (80)
*Excluding samples derived from the same patient and from neuroendocrine tumors
