# Supplementary material for: Common gene mutations in 103 authenticated colorectal cancer cell lines
Source: Research Square preprint supplement (doi:10.21203/rs.3.rs-6907318/v1), 2025-06-30
Supplement: Supplementary file 2 [file c670d694dd92a922fd87f249.xlsx]

## Sheet: Supplementary Table 1
Supplementary Table S1. CRCCL sample overview.
Cell line	Comment sample	Patient sex	Patient age	Sampled tumor	Sampling site	Supplier	Supplier ID	Growth medium*	FBS (%)	MSI status	Reference
C10		Male	NA	Primary	Descending colon	European Collection of Authenticated Cell Cultures (ECACC)	12022901	DMEM/F12	15	MSS	Browing et al., 1993; PMID: 8464898
C106		Female	78	Primary	Rectum	European Collection of Authenticated Cell Cultures (ECACC)	12022906	DMEM/F12	15	MSS	Efstathiou et al., 1999; PMID: 10051639
C32		Female	66	Primary	Colon	European Collection of Authenticated Cell Cultures (ECACC)	12022908	DMEM/F12	15	MSS	Browing et al., 1993; PMID: 8464898
C70		Female	60	Primary	Sigmoid colon	European Collection of Authenticated Cell Cultures (ECACC)	12022903	DMEM/F12	15	MSS	Browing et al., 1993; PMID: 8464898
C75		Male	56	Primary	Sigmoid colon	European Collection of Authenticated Cell Cultures (ECACC)	12022907	DMEM/F12	15	MSS	Browing et al., 1993; PMID: 8464898
C80		Male	69	Primary	Rectum	European Collection of Authenticated Cell Cultures (ECACC)	12022904	DMEM/F12	15	MSS	Browing et al., 1993; PMID: 8464898
C84		Male	67	Primary	Cecum	European Collection of Authenticated Cell Cultures (ECACC)	12022902	DMEM/F12	15	MSS	Browing et al., 1993; PMID: 8464898
Caco-2		Male	72	Primary	Colon	The American Type Culture Collection (The American Type Culture Collection (ATCC))	HTB-37	EMEM	20	MSS	Fogh et al., 1977; PMID: 327080
CaR-1		Male	70	Metastasis	Left inguinal lymph node	Japanese Collection of Research Bioresources (JCRB)	JCRB0207	DMEM/F12	15	MSS	Jia et al. 1997; PMID: 9290701
CL-11		Male	NA	Primary	Colon	The Leibniz Institute (DSMZ)	ACC 467	DMEM/F12	10	MSS	Farrell et al., 2000; PMID: 19003396
CL-14		Male	NA	Primary	Sigmoid colon	The Leibniz Institute (DSMZ)	ACC 504	DMEM/F12	15	MSS	Farrell et al., 2000; PMID: 19003396
CL-34		Female	NA	Primary	Right colon	The Leibniz Institute (DSMZ)	ACC 520	DMEM/F12	10	MSI	Farrell et al., 2000; PMID: 19003396
CL-40		Female	NA	Primary	Colon	The Leibniz Institute (DSMZ)	ACC 535	DMEM/F12	10	MSS	NA
Co-115		Female	77	Primary	Ascending colon	R. Hamelin, National Institute for Health and Medical Research (INSREM), France		DMEM/F12	10	MSI	Carrell et al., 1976; PMID: 975046
CoCM-1		Male	45	Primary	Descending colon	Japanese Collection of Research Bioresources (JCRB)	JCRB0257	DMEM/F12	15	MSS	Kataoka et al., 1989; PMID: 2570482
COLO 205		Male	70	Metastasis	Ascites	National Cancer Institute (NCI) 60		RPMI 1640	15	MSS	Semple et al., 1978; PMID: 565251
COLO 320	Neuroendocrine	Female	55	Primary	Sigmoid colon	R. Hamelin, National Institute for Health and Medical Research (INSREM), France		DMEM/F12	10	MSS	Quinn et al., 1979; PMID: 498117
COLO 678		Male	69	Metastasis	Lymph node	The Leibniz Institute (DSMZ)	ACC 194	DMEM/F12	10	MSS	NA
COLO 94H		Male	70	Primary	Ascending colon	Cyton	300161	DMEM/F12	15	MSS	NA
DLD-1	Derived from HCT 15	Male	67	Primary	Colon	The American Type Culture Collection (ATCC)	CCL-221	RPMI 1640	10	MSI	Dexter et al., 1979; PMID: 427742
EB		NA	NA	Primary	Colon	R. Hamelin, National Institute for Health and Medical Research (INSREM), France		DMEM/F12	10	MSS	Brattain et al., 1981; PMID: 7329817
FRI		NA	NA	Primary	Colon	R. Hamelin, National Institute for Health and Medical Research (INSREM), France		DMEM/F12	10	MSS	Brattain et al., 1981; PMID: 7329817
HCA24		Male	68	Primary	Ascending colon	European Collection of Authenticated Cell Cultures (ECACC)	06061903	DMEM/F12	15	MSS	Kirkland and Bailey, 1986; PMID: 3718830
HCA46		Female	53	Primary	Sigmoid colon	European Collection of Authenticated Cell Cultures (ECACC)	07031601	DMEM/F12	15	MSS	Kirkland and Bailey, 1986; PMID: 3718830
HCA7		Female	58	Primary	Colon	European Collection of Authenticated Cell Cultures (ECACC)	06061902	DMEM/F12	15	MSI	Kirkland, 1986; PMID: 4016751
HCC2998		NA	NA	NA	NA	National Cancer Institute (NCI) 60		RPMI 1640	15	MSS	Alley et al., 1988; PMID: 3335022
HCT 116		Male	48	Primary	Colon	The American Type Culture Collection (ATCC)	CCL-247	DMEM/F12	10	MSI	Brattain et al., 1981; PMID: 7329817
HCT 15		Male	67	Primary	Colon	The American Type Culture Collection (ATCC)	CCL-225	DMEM/F12	10	MSI	Dexter et al., 1979; PMID: 427742
HRA-16		Male	56	Primary	Rectum	European Collection of Authenticated Cell Cultures (ECACC)	06061905	DMEM/F12	15	MSS	Kirkland and Bailey, 1986; PMID: 3718830
HRA-19		Male	66	Primary	Rectum	European Collection of Authenticated Cell Cultures (ECACC)	10012802	DMEM/F12	15	MSS	Kirkland, 1986; PMID: 4016751
HROC103 T0 M1		Male	44	Primary	Rectum	Cyton	300802	DMEM/F12	15	MSS	Mullins et al., 2019; PMID: 31601052
HROC107 cT0 M2		Male	72	Primary	Sigmoid colon	Cyton	300845	DMEM/F12	15	MSS	Mullins et al., 2019; PMID: 31601052
HROC112Met T0 M2		Female	79	Metastasis	Liver	Cyton	300846	DMEM/F12	15	MSS	Mullins et al., 2019; PMID: 31601052
HROC126		Female	58	Primary	Rectum	Cyton	300804	DMEM/F12	15	MSS	Mullins et al., 2019; PMID: 31601052
HROC173		Male	45	Primary	Ascending colon	Cyton	300807	DMEM/F12	15	MSS	Mullins et al., 2019; PMID: 31601052
HROC18		Female	65	Primary	Cecum	Cyton	300808	DMEM/F12	15	MSS	Lange et al., 2014; PMID: 25309914
HROC183		Female	59	Primary	Ascending colon	Cyton	300809	DMEM/F12	15	MSS	Mullins et al., 2019; PMID: 31601052
HROC284Met		Female	67	Metastasis	Liver	Cyton	300816	DMEM/F12	15	MSS	Mullins et al., 2019; PMID: 31601052
HROC309		Male	86	Primary	Descending colon	Cyton	300837	DMEM/F12	15	MSS	Mullins et al., 2019; PMID: 31601052
HROC32		Female	82	Primary	Ascending colon	Cyton	300818	DMEM/F12	15	MSS	Mullins et al., 2019; PMID: 31601052
HROC334		Female	69	Primary	Cecum	Cyton	300850	DMEM/F12	15	MSS	Mullins et al., 2019; PMID: 31601052
HROC39		Male	69	Primary	Ascending colon	Cyton	300820	DMEM/F12	15	MSS	Mullins et al., 2019; PMID: 31601052
HROC40		Male	69	Primary	Descending colon	Cyton	300822	DMEM/F12	15	MSS	Mullins et al., 2019; PMID: 31601052
HROC43		Male	72	Primary	Ascending colon	Cyton	300823	DMEM/F12	15	MSS	Lange et al., 2014; PMID: 25309914
HROC57	Neuroendocrine	Male	43	Primary	Ascending colon	Cyton	300825	DMEM/F12	15	MSS	Gock et al., 2018; PMID: 30197480
HROC60		Male	71	Primary	Ascending colon	Cyton	300827	DMEM/F12	15	MSS	Mullins et al., 2019; PMID: 31601052
HROC69		Male	62	Primary	Ascending colon	Cyton	300828	DMEM/F12	15	MSS	Kuehn et al., 2016; PMID: 27087592
HROC80 T1 M1		Male	72	Primary	Ascending colon	Cyton	300830	DMEM/F12	15	MSS	Mullins et al., 2019; PMID: 31601052
HROC87 T0 M2		Female	76	Primary	Ascending colon	Cyton	300831	DMEM/F12	15	MSI	Maletzki et al., 2012; PMID: 23300683
HT115		NA	NA	NA	NA	European Collection of Authenticated Cell Cultures (ECACC)	85061104	DMEM/F12	15	MSS	NA
HT-29		Female	44	Primary	Colon	R. Hamelin, National Institute for Health and Medical Research (INSREM), France		DMEM/F12	10	MSS	von Kleist et al., 1975; PMID: 1159834
HT-55		Female	54	Primary	Rectum	European Collection of Authenticated Cell Cultures (ECACC)	85061105	DMEM/F12	15	MSS	Watkins and Sanger, 1977; PMID: 194617
Isreco-1		NA	NA	Primary	Ascending colon	R. Hamelin, National Institute for Health and Medical Research (INSREM), France		DMEM/F12	10	MSS	Cottu et al., 1996; PMID: 9000147
Isreco-3	Metastasis of Isreco-1	NA	NA	Metastasis	Peritoneum	R. Hamelin, National Institute for Health and Medical Research (INSREM), France		DMEM/F12	15	MSS	Cottu et al., 1996; PMID: 9000147
JVE017		Female	67	NA	Cecum	The Leibniz Institute (DSMZ)	ACC 803	DMEM/F12	15	MSS	Boot et al., 2017; PMID: 28931069
JVE114		Male	71	Metastasis	Liver	The Leibniz Institute (DSMZ)	ACC 812	DMEM/F12	15	MSS	Boot et al., 2016; PMID: 26894854
JVE127	Mucinous Colon adenocarcinoma	Male	60	Primary	Ascending colon	The Leibniz Institute (DSMZ)	ACC 813	DMEM/F12	15	MSS	Boot et al., 2016; PMID: 26894854
KM12		Male	NA	Primary	Colon	National Cancer Institute (NCI) 60		RPMI 1640	15	MSI	Monks et al., 1991; PMID: 2041050
KP363T		Male	80	Primary	Left colon	The Leibniz Institute (DSMZ)	ACC 808	DMEM/F12	15	MSS	Boot et al., 2016; PMID: 26894854
LIM1863		Female	74	Primary	Colon	European Collection of Authenticated Cell Cultures (ECACC)	17020201	DMEM/F12	15	MSS	Whitehead et al., 1987; PMID: 3567898
LIM2099		Male	NA	Metastasis	Liver	European Collection of Authenticated Cell Cultures (ECACC)	12062002	DMEM/F12	15	MSS	Whitehead et al., 1992; PMID: 1427983
LIM2405		Male	NA	Primary	Colon	European Collection of Authenticated Cell Cultures (ECACC)	12062003	DMEM/F12	15	MSI	Whitehead et al., 1992; PMID: 1427983
LoVo		Male	56	Metastasis	Left supraclavicular lymph node	The American Type Culture Collection (ATCC)	CCL-229	DMEM/F12	10	MSI	Drewinko et al., 1976; PMID: 1260746
LS1034		Male	54	Primary	Cecum	R. Hamelin, National Institute for Health and Medical Research (INSREM), France		DMEM/F12	10	MSS	Suardet et al., 1992; PMID: 1617643
LS123		Female	65	Primary	Colon	The American Type Culture Collection (ATCC)	CCL-255	DMEM/F12	15	MSS	Rutzky et al., 1983; PMID: 6826200
LS174T		Female	58	Primary	Colon	R. Hamelin, National Institute for Health and Medical Research (INSREM), France		DMEM/F12	10	MSI	Tom et al., 1976; PMID: 1262041
LS513		Male	63	Primary	Ileocecal valve	The American Type Culture Collection (ATCC)	CRL-2134	DMEM/F12	15	MSS	Suardet et al., 1992; PMID: 1617643
MDST8		NA	NA	Primary	Colon	European Collection of Authenticated Cell Cultures (ECACC)	99011801	DMEM/F12	15	MSS	Diaz et al., 1998; PMID: 9813657
NCI-H508		Male	58	Metastasis	Abdominal wall	The American Type Culture Collection (ATCC)	CCL-253	RPMI 1640	15	MSS	Park et al., 1987; PMID: 3479249
NCI-H716	Neuroendocrine	Male	33	Metastasis	Ascites	The American Type Culture Collection (ATCC)	CCL-251	DMEM/F12	15	MSS	Park et al., 1987; PMID: 3479249
NCI-H747		Male	69	Metastasis	Lymph node	The American Type Culture Collection (ATCC)	CCL-252	DMEM/F12	15	MSS	Park et al., 1987; PMID: 3479249
OUMS-23		Male	37	Metastasis	Pericardial effusion	Japanese Collection of Research Bioresources (JCRB)	JCRB1022	DMEM/F12	15	MSS	Miyazaki et al., 1996; PMID: 8576285
RCM-1		Female	73	Primary	Rectum	Japanese Collection of Research Bioresources (JCRB)	JCRB0256	DMEM/F12	15	MSS	Nabeshima et al., 1988; PMID: 3198327
RKO		NA	NA	Primary	Colon	The American Type Culture Collection (ATCC)	CRL-2577	DMEM/F12	10	MSI	Brattain et al., 1981; PMID: 7329817
SK-CO-1		Male	65	Metastasis	Ascites	The American Type Culture Collection (ATCC)	HTB-39	DMEM/F12	15	MSS	Fogh et al., 1977; PMID: 327080
SNU-1033		Female	45	Primary	Rectum	Korean Cell Line Bank (KCLB)	01033	RPMI 1640	10	MSS	Oh et al., 1999; PMID: 10362137
SNU-1181		Male	65	Metastasis	Liver	Korean Cell Line Bank (KCLB)	01181	RPMI 1640	10	MSS	Ku et al., 2010; PMID: 20176655
SNU-1197		Male	70	Primary	Colon	Korean Cell Line Bank (KCLB)	01197	RPMI 1640	10	MSS	Oh et al., 1999; PMID: 10362137
SNU-1235		Female	68	Primary	Ascending colon	Korean Cell Line Bank (KCLB)	01235	RPMI 1640	10	MSS	Ku et al., 2010; PMID: 20176655
SNU-1411		Male	42	Primary	Rectum	Korean Cell Line Bank (KCLB)	01411	RPMI 1640	10	MSS	Ku et al., 2010; PMID: 20176655
SNU-1460		Male	25	Primary	Sigmoid colon	Korean Cell Line Bank (KCLB)	01460	RPMI 1640	10	MSS	Ku et al., 2010; PMID: 20176655
SNU-1746	Signet ring coloretal cancer	Male	43	Metastasis	Lymph node	Korean Cell Line Bank (KCLB)	01746	RPMI 1640	10	MSI	Ku et al., 2010; PMID: 20176655
SNU-254		Female	61	Primary	Rectum	Korean Cell Line Bank (KCLB)	00254	RPMI 1640	10	MSS	Ku et al., 2010; PMID: 20176655
SNU-61		Male	48	Metastasis	Liver	Korean Cell Line Bank (KCLB)	00061	RPMI 1640	10	MSS	Oh et al., 1999; PMID: 10362137
SNU-70		Male	61	Primary	Rectum	Korean Cell Line Bank (KCLB)	00070	RPMI 1640	10	MSS	Ku et al., 2010; PMID: 20176655
SNU-81		Male	58	Primary	Colon	Korean Cell Line Bank (KCLB)	00081	RPMI 1640	10	MSS	Oh et al., 1999; PMID: 10362137
SNU-977		Female	52	Primary	Rectum	Korean Cell Line Bank (KCLB)	00977	RPMI 1640	10	MSS	Ku et al., 2010; PMID: 20176655
SNU-C1		Male	71	Metastasis	Peritoneum	The American Type Culture Collection (ATCC)	CRL-5972	RPMI 1640	10	MSS	Park et al., 1987; PMID: 3479249
SNU-C5		Female	77	Primary	Cecum	Korean Cell Line Bank (KCLB)	0000C5	RPMI 1640	10	MSI	Park et al., 1987; PMID: 3479249
SW1116		Male	73	Primary	Colon	The American Type Culture Collection (ATCC)	CCL-233	DMEM/F12	15	MSS	Leibovitz et al., 1976; PMID: 1000501
SW1222		Male	NA	Primary	Colon	European Collection of Authenticated Cell Cultures (ECACC)	12022910	DMEM/F12	15	MSS	Kerbel et al., 1977; PMID: 924690
SW1417		Female	53	Primary	Colon	European Collection of Authenticated Cell Cultures (ECACC)	90102543	DMEM/F12	15	MSS	Kerbel et al., 1977; PMID: 924690
SW1463		Female	66	Primary	Rectum	The American Type Culture Collection (ATCC)	CCL-234	DMEM/F12	10	MSS	Kerbel et al., 1977; PMID: 924690
SW403		Female	51	Primary	Colon	The Leibniz Institute (DSMZ)	ACC 294	DMEM/F12	10	MSS	Leibovitz et al., 1976; PMID: 1000501
SW48		Female	83	Primary	Colon	The American Type Culture Collection (ATCC)	CCL-231	DMEM/F12	10	MSI	Leibovitz et al., 1976; PMID: 1000501
SW480		Male	51	Primary	Colon	R. Hamelin, National Institute for Health and Medical Research (INSREM), France		DMEM/F12	15	MSS	Leibovitz et al., 1976; PMID: 1000501
SW620	Metastasis of SW480	Male	51	Metastasis	Lymph node	The American Type Culture Collection (ATCC)	CCL-227	DMEM/F12	10	MSS	Leibovitz et al., 1976; PMID: 1000501
SW837		Male	53	Primary	Rectum	The American Type Culture Collection (ATCC)	CCL-235	DMEM/F12	10	MSS	Leibovitz et al., 1976; PMID: 1000501
SW948		Female	81	Primary	Colon	The American Type Culture Collection (ATCC)	CCL-237	DMEM/F12	15	MSS	Leibovitz et al., 1976; PMID: 1000501
T84		Male	72	Metastasis	Lung	European Collection of Authenticated Cell Cultures (ECACC)	88021101	DMEM/F12	15	MSS	Dharmsathaphorn et al., 1984; PMID: 6141741
TC71		NA	NA	Primary	Sigmoid colon	R. Hamelin, National Institute for Health and Medical Research (INSREM), France		DMEM/F12	10	MSI	Hoang et al., 1997; PMID: 9000572
VACO 9P		Male	67	Primary	Rectum	R. Hamelin, National Institute for Health and Medical Research (INSREM), France		DMEM/F12	10	MSS	McBain et al., 1984; PMID: 6498841
WiDr	Derived from HT-29	Female	44	Primary	Colon	The American Type Culture Collection (ATCC)	CCL-218	EMEM	10	MSS	Petricciani et al., 1974; PMID: 4203458
*Medium also added antibiotics Streptomycin and Penicillin, as well as the amino acid L-glutamine.
Abreviations:
2 mM L-glutamine (Sigma-Aldrich)
EMEM: Eagle's Minimal Essential Medium (ATCC)
RPMI 1640: Roswell Park Memorial Institute 1640 (Gibco)
FBS: Fetal Bovine Serum (Gibco)
100 µl/ml streptomycin, 100 units/ml penicillin (Gibco)
DMEM/F-12: Dulbecco's Modified Eagle Medium: Nutrient Mixture F-12 (Gibco)

## Sheet: Supplementary Table 2
Supplementary Table S2. STR profiling.
Cell line ID	CLASTR % STR match	CLASTR No. markers (including AMEL)	CLASTR versus repository	Repository manual check	STR comment	AMEL_al1	AMEL_al2	CSF1PO_al1	CSF1PO_al2	CSF1PO_al3	CSF1PO_al4	D13S317_al1	D13S317_al2	D13S317_al3	D13S317_al4	D16S539_al1	D16S539_al2	D16S539_al3	D16S539_al4	D18S51_al1	D18S51_al2	D18S51_al3	D18S51_al4	D19S433_al1	D19S433_al2	D19S433_al3	D21S11_al1	D21S11_al2	D21S11_al3	D2S1338_al1	D2S1338_al2	D2S1338_al3	D2S1338_al4	D3S1358_al1	D3S1358_al2	D3S1358_al3	D5S818_al1	D5S818_al2	D5S818_al3	D5S818_al4	D7S820_al1	D7S820_al2	D7S820_al3	D8S1179_al1	D8S1179_al2	D8S1179_al3	FGA_al1	FGA_al2	FGA_al3
C10	100.00%	14		ECACC	unique	X	Y	11				13				11				18				14	14.2		30	31.2		18	25			16	17		12				10	13		13	16		21	22
C106	100.00%	10		ECACC	unique	X		10	11			8	14			12	13			16				13	15		32.2			19				14	17		12				8	10		12	15		19	23
C32	100.00%	10		ECACC	unique	X		10	11			8	11			9				12				13	14		28	30		20	25			16			11				9			12	13		21	25
C70	100.00%	10		ECACC	unique	X		12				12				11	12			14				13			29	31.2		20	26			15	16		10				9			13	14		21
C75	100.00%	14	D5S818: CLASTR (best) reference is 8,12	ECACC	unique	X	Y	12				10	13			8	11			12	14			14	15		27	31		18	24			15	16		8	12			9	11		12	13		23
C80	100.00%	14		ECACC	unique	X	Y	10	12			8	11			9	10			18				15	16		28	29		21	24			16	17		11	12			10	11		13	14		20	21
C84	97.78%	14		ECACC	unique	X		11	12			11	12			13				17				14	14.2		33.2			21				15	18		12				11			13	15		19	20	21
Caco-2	97.96%	16	D21S11: CLASTR (best) reference is 30 D8S1179: CLASTR (best) reference is 12	ATCC	unique	X		11				11	14			12	13			12				15			30			17	25			14	17		12	13			11	12		12			19
CaR-1	100.00%	16		JCRB	unique	X		11				9	12			9				14	20			13			32.2			19	20			17			10				8	12		13	15		23	25
CL-11	98.11%	16	D7S820: CLASTR (best) reference is 9,10	DSMZ	unique	X	Y	11				13	14			11	13			14				14	15.2		31	32.2		17	19			15	16		12				9	10		14			22	23
CL-14	95.83%	16		DSMZ	unique	X		12				8	12			11	13			17				13	17		28	29		21	25			17			11				11	12		11			25
CL-34	100.00%	16		DSMZ	unique	X		11	16			11	13			9	11			12	17	18	19	12	16		30			19				12	17		9	11			10	15		10	11		22	24
CL-40	100.00%	16		DSMZ	unique	X		10	12			8	11			11	12			14				12	13		30	32.2		19	25			16			11				8	9		12	14		21	24
Co-115	98.46%	16		STR profile not available	unique	X		11	13	14		13	16			10	11			14	15			10	14	15	35	35.2		22	25			13	15	16	10	11			7			11	12		19	21
CoCM-1	97.67%	14	STR profile not available at JCRB	ECACC	unique	X		12				10				12	13			14				12	14		29	31		19	24			16	18		11	12			9	11		13	16		24
COLO 205	100.00%	16		ATCC	unique	X		11	12			10	12			12	13			18				13	14		30.2	33.2		17	18			16			10	13			9	10		9	14		21	23
COLO 320	93.33%	16	D19S433: CLASTR (best) reference is 16.2	DSMZ	unique	X		11				11				11	12			15				16.2			31	33.2		18	25			17	20		12				9	12		13			20
COLO 678	100.00%	16		DSMZ	unique	X		12				10	13			9				11	14			14			27	29		24				15	18		13	14			8	12		12	13		25	27
COLO 94H	100.00%	14	D21S11: CLASTR reference is 27,28	Cytion	unique	X	Y	11	14			11				13				18				14			27	28		19	23			15	17		12				8			12			21
DLD-1	100.00%	16		Cytion	same as HCT 15	X	Y	12				8	11			12	13			11	17			14	16		29	32.2		17	25			17			13				10	12		15			22
EB	100.00%	16		STR profile not available	unique	X		12	15			11				11	12			14	16			13			28	32.2		19				14	15		10	11			8	9		11	13		21	22.2
FRI	100.00%	16		STR profile not available	unique	X		10				11				12				13				12.2	14		27	29		18				15	17		12				9			15	16		20
HCA24	97.14%	10		ECACC	unique	X	Y	11				12	13			11	12			13	20			12	14		28	29		20	25			16	17		13				8			14			20	24
HCA46	100.00%	10		ECACC	unique	X		11	12			10	11			11	13			14				13	14		30			20	24			15	18		11	12			10	14		12	13		22	26
HCA7	79.25%	14	D3S1358: CLASTR (best) reference is 15,19 D8S1179: CLASTR (best) reference is 12,14 D18S51: CLASTR (best) reference is 19 FGA: CLASTR (best) reference is 18.2,22	ECACC	unique	X		11	14			9				10	11			13	18			12	13		26	29.2		16	25	26		15	18		9	11	12		11	12		11	14		23
HCC2998	100.00%	16		STR profile not available	unique	X		11	13			11	12			9	12			12	15			12	15		29	30		18	23			17	19		12				10	11		11	14		25
HCT 116	90.63%	16	AMEL: CLASTR (best) reference is X CSF1PO: CLASTR (best) reference is 7,9,10,11 D16S539: CLASTR (best) reference is 11,12,13,14 D19S433: CLASTR (best) reference is 12 D8S1179: CLASTR (best) reference is 12,14 TPOX: CLASTR (best) reference is 8	ATCC	unique	X	Y	7	10			10	12			11	13			16	17			12	13		29	30		16				12	18	19	10	11			11	12		12	14		18	23
HCT 15	100.00%	16		ATCC	same as DLD-1	X	Y	12				8	11			12	13			11	17			14	16		29	32.2		17	25			17			13				10	12		15			22
HRA-16	100.00%	10		ECACC	unique	X	Y	11				9	13			10	13			16				12	13		28			16	27			15	17		12				11	12		15			18
HRA-19	100.00%	9		ECACC	unique	X	Y	12				11	12			11				15				14	15		28	30		19				18			11				9	12		14			19
HROC103 T0 M1	81.48%	9		Cytion	unique	X		12				13				12	13			14				14	16		29	31		25	27			15	18		13				9	10		10			24
HROC107 cT0 M2	83.87%	9		Cytion	unique	X	Y	10				8	13			10	12			12				14			30	31		17	25			15			13				10	11		13	14		20
HROC112Met T0 M2	NA	NA	STR profile not available at Cytion - discontinued	STR profile not available	unique	X		10	12			11				9				13				13	14		30	30.2		21	22			16			11	12			8	12		13			20
HROC126	92.31%	9		Cytion	unique	X		11				8	11			11	14			18				13	14		27	29		17	20			16	17		13				12			13	14		21
HROC173	96.00%	9		Cytion	unique	X		11	12			11	12			12				13				14			30	31.2		23	25			16			12				10			12	14		21	22.2
HROC18	100.00%	10		Cytion	unique	X		12				11				12	13			13	16			14	15		30	33.2		17	26			15			9	11			8	11		12	14		22.2	24
HROC183	93.75%	9		Cytion	unique	X		10	11			11	12			11	13			15				16	16.2		29	30		16	26			14	15		11	13			10	11		12	15		24	26
HROC284Met	97.67%	13		Cytion	unique	X		11	13			9				9	13			16				12	14		30	31.2		25				15			11	12			8	12		12	13		20	25
HROC309	100.00%	14		Cytion	unique	X		11	12			11	12			11				12				14.2	15		29	32.2		17	18			15			10				9	11		11	13		19	20
HROC32	93.33%	14	D13S317: CLASTR (best) reference is 11,12	Cytion	unique	X		14	15			11	12			11	12			12				12	16		31			16	24			15	17		11	12			8	11		12			19
HROC334	96.55%	9		Cytion	unique	X		11				11	12			11	13			11				14.2			31.2	34.2		17	19			15	17		11	12			10			12			23
HROC39	100.00%	10	D16S539: CLASTR (best) reference is 12 D5S818: CLASTR (best) reference is 13 TH01: CLASTR (best) reference is 7,9.3	Cytion	unique	X		12	13			12	13			12				17				13			29			23	24			15	16		13				12			11	14		23.2
HROC40	96.55%	10		Cytion	unique	X		10				11	12			11				18				16.2			30			17				18			11	13			11			10	12		22	23
HROC43	85.71%	10		Cytion	unique	X		11				8	12			9	13			14				14.2	15		31.2			21	25			16			12				13			12	13		20	22
HROC57	100.00%	10		Cytion	unique	X		10				12				9	12			14				13	14		30			23				16			12				11			13			22
HROC60	96.77%	10	D5S818: CLASTR (best) reference is 11,12 TH01: CLASTR (best) reference is 6,8	Cytion	unique	X	Y	11				8	11			9	11			13	14			14	15		28			17	24			16	17		12				10	12		12	14		20	21
HROC69	100.00%	10	D13S317: CLASTR (best) reference is 11,12,13	Cytion	unique	X	Y	10	11			11	12	13		12	13			15	16			14			29	33.2		22	25			15	17		12	13			10	12		10	12		24	25
HROC80 T1 M1	92.86%	10		Cytion	unique	X		12				8				10				17	22			14	14.2		30	32.2		18	20			15			12	13			9	11		13	14		23
HROC87 T0 M2	100.00%	10		Cytion	unique	X		12				10	14			11	13			12	18			12			28	29		18				16	18		9	11			9			13	15		21
HT115	100.00%	14		ECACC	unique	X		7	12			13				10				12	15			12	15.2		30	32.2		19	22			17			12				11	12		13	15		19	20
HT-29	100.00%	16		ATCC	same as WiDr	X		11	12			11	12			11	12			13				14			29	30		19	23			15	17		11	12			10			10	16		20	22
HT-55	100.00%	14		ECACC	unique	X		11				9	13			14				13				14	15		28			17	23			15	18		11	12			11	13		11	14		24
Isreco-1	100.00%	16		STR profile not available	same as Isreco-3	X		11	12			12				12				10	20			13			31.2	32.2		20				16	18		12	13			9	10		10	12		21	22
Isreco-3	95.83%	16		STR profile not available	same as Isreco-1	X		11	12			12				12				10				13			31.2	32.2		20				16	18		12	13			9	10		10	12		21	22
JVE017	98.11%	16		DSMZ	unique	X		11	12			12				11	12			13				13	14		30	31		17	20			15	18		11				10	11		11	14		21
JVE114	100.00%	16		DSMZ	unique	X		12				11	12			11	13			14				13			29	30		17	23			14			12				8	9		14	16		20	22
JVE127	100.00%	16	AMEL: CLASTR reference is X,Y	DSMZ	unique	X	Y	11				8	13			12	13			17				13	14		30			18	19			16	18		13				8	12		15			24
KM12	95.83%	15		STR profile not available	unique	X		10	11	12		12	15			11				13				11	14		27			20	22	24		14			10	17			8			11	13		20	22
KP363T	95.65%	16	TH01: CLASTR (best) reference is 6,9.3	DSMZ	unique	X		10				11				12				13				14	14.2		28	29		17	23			17			12				8	10		11	13		21
LIM1863	100.00%	16		ECACC	unique	X		10				8	11			12	13			13				14	16		32			24				15			13				9	10		10	14	15	19	21
LIM2099	100.00%	16		ECACC	unique	X	Y	11				8				11				12	15			13.2	14		29	30		24	25			15			11				13			10	13		19	25
LIM2405	96.88%	16		ECACC	unique	X	Y	14	15			8	11			14	15			12	17	18		13	14.2		29	31		17	19			15	16		12	13			7	8		10	12		19	21
LoVo	76.71%	16	D16S539: CLASTR (best) reference is 9,11,12 D2S1338: CLASTR (best) reference is 16,17,18	ATCC	unique	X	Y	12	13	14	15	8	11			9	12			12	13	18	19	14	15		29	31.2		17	18			14	16		11	13			10	12		10			17	19
LS1034	100.00%	16		ATCC	unique	X	Y	11	12			12				9	11			20				13	15		29	30		17	25			15	18		12	13			8	12		13			20
LS123	100.00%	16		ATCC	unique	X		10	11			9	13			13				16				14			30	31		19				16	18		11				9			13	16		22
LS174T	88.24%	16	D16S539: CLASTR (best) reference is 11,12,13 D18S51: CLASTR (best) reference is 11,12,13 D19S433: CLASTR (best) reference is 13,14,15 D2S1338: CLASTR (best) reference is 18,22 D7S820: CLASTR (best) reference is 11 D8S1179: CLASTR (best) reference is 12,16 vWA: CLASTR (best) reference is 15,17	ATCC	unique	X		10	13			10	11			11	12	13		11	13			14	15		29	31		18	22			15	17		12	15			11			12	16		21	22
LS513	100.00%	16		ATCC	unique	X	Y	10	13			9	10			12	13			12	18			12	14		30			19				15			9	11			8	11		13			19	21
MDST8	96.30%	16	D18S51: CLASTR (best) reference is 16,19.3	ECACC	unique	X		11				10	11			11				16	20			12	14	15	28	31		23				16	17		10				8	10		11	14		23	25
NCI-H508	98.18%	16	D21S11: CLASTR (best) reference is 29,32.2	ATCC	unique	X		11	12			8	12			12				18				14			29	32.2		18	19	27		14	17	19	12				8	12		12			24	25
NCI-H716	98.25%	16		ATCC	unique	X		11				8	11			11	12			15	16			15	18.2		32.2			14	16			16	18		11				10	11		14	15		20	22
NCI-H747	100.00%	16		ATCC	unique	X	Y	11	12			11	12			9	12			12				14			29			17	21			17			11				10			13	14		21.2
OUMS-23	100.00%	14		JCRB	unique	X		12				12				11				16				13	13.2		28	30		18	24			16	17		11				10	13		13	16		23.2
RCM-1	100.00%	14		JCRB	unique	X		10	12			10	12			11	12			15				13			29			18	24			16			11	12			11	12		13			20	22
RKO	100.00%	16	D19S433: CLASTR (best) reference is 14 D5S818: CLASTR (best) reference is 11,13 vWA: CLASTR (best) reference is 16,17,22	ATCC	unique	X		8	10			8	11			12	13			11	12			14			27	30		16				16	19		11	13			8	10		9	13	14	20	21	22
SK-CO-1	100.00%	16		ATCC	unique	X	Y	13				14				13				19				12	13		28	30		17	21			17	18		9	11			8	10		12	14		20	25
SNU-1033	100.00%	16		KCLB	unique	X		10				10				9				13				13	14		29	30		18	26			14	17		13				11	12		12	13		23
SNU-1181	97.87%	16	D8S1179: CLASTR reference is 10,12	KCLB	unique	X		12				10	11			10	12			17				14	15		29	32.2		25				16			10				10	11		12			18	23
SNU-1197	90.32%	10	TH01: CLASTR reference is 8,9 TPOX: CLASTR reference is 7,8	KCLB	unique	X		11	12			9	11			9				10				13	15.2		30			20	23			18			10	12			11	12		14			23
SNU-1235	100.00%	16		KCLB	unique	X		12				13				12				13				14.2	15.2		30			19				15	16		12				8	12		12	16		23
SNU-1411	100.00%	16		KCLB	unique	X		10	12			10	11			12	13			14				14			30			19	24			15			11	13			11			15			23	24
SNU-1460	100.00%	16	CSF1PO: CLASTR reference is 12 D3S1358: CLASTR reference is 15,17	KCLB	unique	X		12				9	12			10				13				13	14.2		30.2	31		23	24			15	17		11				8	11		13			21	23
SNU-1746	93.75%	16	D5S818: CLASTR (best) reference is 11,12,13,14	KCLB	unique	X	Y	7	9			9				9	14			13	14	18		13	17.2		28	33		18	24	25		14	17	18	11	12	13	14	8	11		11			17	22
SNU-254	100.00%	16		KCLB	unique	X		10	11			11				9				12				12	15.2		31			23				16	17		10	11			11	13		13	15		24	25
SNU-61	100.00%	12	AMEL: CLASTR (best) reference is X D5S818: CLASTR (best) reference is 11	KCLB	unique	X		12				8				12				16				12			29			18	19			15			11				8			14	15		22	26
SNU-70	100.00%	16		KCLB	unique	X	Y	10	12			8	12			11				13				14			31	32.2		18	19			15	16		10	11			8	11		12	14		21
SNU-81	100.00%	12	AMEL: CLASTR (best) reference is X	KCLB	unique	X		11	13			9	10			9	12			19	20			13	14.2		30	31		17	19			15	16		10	11			12			13			19	25
SNU-977	100.00%	16	CSF1PO: CLASTR (best) reference is 11,12 D13S317: CLASTR (best) reference is 11 D5S818: CLASTR (best) reference is 11,12 vWA: CLASTR (best) reference is 16,17,18	KCLB	unique	X		11	12			11				10				15				13			29			19	22			16			11	12			10	12		10			20
SNU-C1	100.00%	16		ATCC	unique	X		12				9	11			9	11			16				13	14		30			17	25			17			10				10	11		13	15		24
SNU-C5	100.00%	12	D7S820: CLASTR (best) reference is 12	KCLB	unique	X		11	13			8				8	13			15	21	22		12	14		29	31.2		22	23			15			11	12			12			12	14		19	23
SW1116	100.00%	14		ATCC	unique	X	Y	10	11			11	14			9	12			13				14			28	29		24	25			16			11	12			12			10	11		21	22
SW1222	100.00%	10		ECACC	unique	X	Y	11				9	13			9	10			12				14	15		29			24				15			9				10	12		12			20
SW1417	100.00%	16		ECACC	unique	X		12				12				11	12			15				12			29	32.2	33.2	24	25			15	16		12				9	11		8			23
SW1463	100.00%	16		ATCC	unique	X		11	12			12	13			11				18				14	15		30	31.2		17	18			16	17		13	14			9			11	15		23	28
SW403	97.78%	16	D8S1179: CLASTR (best) reference is 11	DSMZ	unique	X		10	13			13				10	12			17				17	18.2		28	29		24				15			11				8	9		11			19
SW48	96.43%	16	vWA: CLASTR (best) reference is 18,20	ATCC	unique	X		9	10			11	12			11	13			13				14			28	31		19	27			14	15		10	14			9	10		13	14		20
SW480	100.00%	16		ATCC	similar to SW620	X		13	14			12				13				13				13			30	30.2		17	24			15			13				8			13			24
SW620	100.00%	16		ATCC	similar to SW480	X		13	14			12				9	13			13				13			30	30.2		17	24			16			13				8	9		13			24
SW837	100.00%	16		ATCC	unique	X		10				13				12				17				13			28	31.2		24				18			12				9	12		8	14		25
SW948	100.00%	16		ATCC	unique	X		12				10	11			11	12			19				13	15		25.2	29		17	24			16			11				9	11		12	14		24
T84	100.00%	16		ECACC	unique	X		10				9				10	11			17				13			31			23	26			19			12				8	10		15			24
TC71	98.31%	16		STR profile not available	unique	X		10	15			8	9	12	13	11				10	11	15		13			29	32.2		16	17			15			10	12			12			10	13		18	19
VACO 9P	97.96%	16		STR profile not available	unique	X	Y	12				9	12			12	13			13				13			30			17	20			15			12				10			13	14		23	25
WiDr	100.00%	16		ATCC	same as HT-29	X		11	12			11	12			11	12			13				14			29	30		19	23			15	17		11	12			10			10	16		20	22
[truncated: 10 more columns]

## Sheet: Supplementary Table 3
Supplementary Table S3. Gene panel description.
Genes	Target regions	Variant types called	Sequencing coverage, median no. of reads (95% confidence interval)
APC	all coding	SNV, indel, CNV	642 (601 - 669)
ARID1A	all coding	SNV, indel, CNV	580 (546 - 604)
BRAF	all coding	SNV, indel, CNV	662 (636 - 709)
CCND2	all coding, selected intronic	SNV, indel, CNV	623 (611 - 678)
CTNNB1	all coding	SNV, indel, CNV	592 (553 - 613)
EGFR	all coding, selected intronic	SNV, indel, CNV	786 (755 - 836)
ERBB2	all coding, intronic	SNV, indel, CNV	710 (677 - 754)
FBXW7	all coding	SNV, indel, CNV	474 (451 - 499)
JAK1	all coding	SNV, indel, CNV	540 (519 - 565)
KRAS	all coding	SNV, indel, CNV	498 (494 - 556)
MDM2	all coding, selected intronic	SNV, indel, CNV	604 (587 - 635)
MYC	all coding, selected intronic	SNV, indel, CNV	934 (925 - 1110)
NF1	all coding	SNV, indel, CNV	563 (543 - 604)
NRAS	all coding	SNV, indel, CNV	551 (515 - 566)
PIK3CA	all coding	SNV, indel, CNV	574 (561 - 604)
POLE	c.1376C>T:p.S459F; c.1366G>C:p.A456P c.1331T>A:p.M444K c.1307C>G:p.P436R c.1270C>A:p.L424I c.1231G>T/C:p.V411L c.1102G>T:p.D368Y c.1100T>C:p.F367S c.890C>T:p.S297F c.884T>G:p.M295R c.857C>G:p.P286R	SNV	689 (658 - 727)
PTEN	all coding	SNV, indel, CNV	551 (514 - 568)
SMAD2	all coding	SNV, indel, CNV	399 (373 - 432)
SMAD4	all coding	SNV, indel, CNV	383 (350 - 416)
TP53	all coding	SNV, indel, CNV	534 (517 - 582)
DETAILED OVERVIEW OF POLE

## Sheet: Supplementary Table 4
Supplementary Table S4. Count of indels and SNVs per phenotype.
Sample	MSI status	Mutations Overall	Frameshift deletion	Frameshift insertion	Nonframeshift deletion	Nonframeshift insertion	Dinucleotide substitution	Missense SNVs	Nonsense SNVs	Splicing site
C106	MSS	3	1	0	0	0	0	2	0	0
C32	MSS	4	0	1	0	0	0	1	2	0
C70	MSS	1	0	0	0	0	0	0	1	0
C75	MSS	5	2	0	0	0	0	1	2	0
C80	MSS	5	0	0	0	0	0	2	3	0
C84	MSS	5	0	0	0	0	0	2	3	0
Caco-2	MSS	5	0	0	0	0	0	3	2	0
CaR-1	MSS	1	0	0	0	0	0	1	0	0
CL-11	MSS	6	0	0	0	0	0	5	1	0
CL-14	MSS	5	0	0	0	0	0	3	2	0
CL-40	MSS	5	1	0	1	0	0	2	1	0
CoCM-1	MSS	4	0	0	0	0	0	2	2	0
COLO 205	MSS	4	2	1	0	0	0	1	0	0
COLO 320	MSS	3	0	0	0	0	0	2	1	0
COLO 678	MSS	2	0	1	0	0	0	1	0	0
COLO 94H	MSS	7	0	0	0	0	0	5	2	0
EB	MSS	4	0	1	0	0	0	2	1	0
FRI	MSS	7	0	1	0	0	0	5	1	0
HCA46	MSS	4	1	0	0	0	0	1	2	0
HRA-16	MSS	2	1	1	0	0	0	0	0	0
HRA-19	MSS	3	0	0	0	0	0	1	2	0
HROC103 T0 M1	MSS	3	0	0	0	0	0	1	2	0
HROC107	MSS	6	1	0	0	0	0	3	2	0
HROC112Met T0 M2	MSS	6	1	0	0	0	0	4	1	0
HROC126	MSS	3	1	0	0	0	0	0	2	0
HROC173	MSS	5	0	0	0	0	0	2	3	0
HROC18	MSS	5	2	0	0	0	0	3	0	0
HROC183	MSS	4	0	0	0	0	0	2	2	0
HROC284Met	MSS	5	0	0	0	0	0	2	3	0
HROC309	MSS	3	0	0	0	0	0	0	2	1
HROC32	MSS	3	1	0	0	0	0	2	0	0
HROC334	MSS	6	1	1	0	0	0	2	2	0
HROC39	MSS	4	2	0	0	0	0	2	0	0
HROC40	MSS	4	0	0	0	0	0	3	1	0
HROC43	MSS	3	1	0	0	0	0	1	1	0
HROC57	MSS	4	0	0	0	0	0	1	3	0
HROC60	MSS	6	0	0	0	0	0	4	1	1
HROC80 T1 M1	MSS	5	1	1	0	0	0	3	0	0
HT29	MSS	7	0	1	0	0	0	4	2	0
HT55	MSS	9	0	0	0	0	1	6	2	0
Isreco-1	MSS	8	1	1	0	0	0	4	2	0
Isreco-3	MSS	6	1	0	0	0	0	3	2	0
JVE017	MSS	2	0	0	0	0	0	2	0	0
JVE114	MSS	3	1	1	0	0	0	1	0	0
JVE127	MSS	4	0	0	1	1	0	2	0	0
KP363T	MSS	3	0	0	0	0	0	2	1	0
LIM1863	MSS	3	1	0	0	0	0	2	0	0
LIM2099	MSS	2	0	0	1	0	0	1	0	0
LS1034	MSS	3	1	0	0	0	0	2	0	0
LS123	MSS	6	0	0	0	0	0	3	3	0
LS513	MSS	2	0	0	0	0	1	1	0	0
MDST8	MSS	3	0	1	0	0	1	1	0	0
NCI-H508	MSS	3	0	0	0	0	0	3	0	0
NCI-H716	MSS	2	0	0	0	0	0	2	0	0
NCI-H747	MSS	5	0	0	0	0	0	3	2	0
OUMS-23	MSS	4	1	1	0	0	0	2	0	0
RCM-1	MSS	5	0	0	0	0	0	3	2	0
SK-CO-1	MSS	3	2	0	0	0	0	1	0	0
SNU-1033	MSS	3	0	0	0	0	0	2	1	0
SNU-1181	MSS	3	0	0	0	0	0	2	1	0
SNU-1197	MSS	5	1	0	0	0	0	3	1	0
SNU-1235	MSS	7	1	1	0	0	0	3	2	0
SNU-1411	MSS	3	0	0	0	0	0	2	1	0
SNU-1460	MSS	3	0	0	0	0	0	2	0	1
SNU-254	MSS	6	1	0	0	0	0	4	1	0
SNU-61	MSS	3	0	0	0	0	0	2	1	0
SNU-70	MSS	4	1	0	0	0	0	1	2	0
SNU-977	MSS	4	0	2	0	0	0	2	0	0
SNU-C1	MSS	1	0	0	0	0	0	0	1	0
SW1116	MSS	7	1	0	0	0	0	5	1	0
SW1222	MSS	3	0	0	0	0	0	2	1	0
SW1417	MSS	4	1	0	0	0	0	2	1	0
SW1463	MSS	5	1	0	0	0	0	4	0	0
SW403	MSS	5	1	0	0	0	0	2	2	0
SW480	MSS	4	0	0	0	0	0	3	1	0
SW620	MSS	5	0	0	0	0	0	4	1	0
SW837	MSS	6	0	1	0	0	0	3	2	0
SW948	MSS	7	1	0	0	0	0	4	2	0
T84	MSS	4	1	0	0	0	0	3	0	0
VACO 9P	MSS	1	0	0	0	0	0	1	0	0
WiDr	MSS	8	0	1	0	0	0	5	2	0
CL-34	MSI	7	1	1	0	0	0	4	1	0
Co-115	MSI	9	5	2	0	0	0	1	1	0
DLD-1	MSI	12	1	0	0	0	0	10	1	0
HCA7	MSI	5	2	2	0	0	0	0	1	0
HCT 116	MSI	4	0	0	1	0	0	3	0	0
HCT 15	MSI	15	1	0	0	0	0	13	1	0
HROC87 T0 M2	MSI	7	2	1	0	0	0	4	0	0
KM12	MSI	14	2	3	0	0	0	7	2	0
LIM2405	MSI	9	4	1	0	0	0	4	0	0
LoVo	MSI	10	2	0	0	0	0	7	1	0
LS174T	MSI	7	2	0	0	0	0	5	0	0
RKO	MSI	11	4	1	0	0	0	6	0	0
SNU-1746	MSI	10	1	2	0	0	0	6	1	0
SNU-C5	MSI	10	2	1	0	0	0	7	0	0
SW48	MSI	9	3	0	0	0	0	5	1	0
TC71	MSI	10	2	0	0	0	0	4	4	0
HCA24	MSS-POLE	18	0	0	0	0	0	11	7	0
HCC2998	MSS-POLE	20	0	0	0	0	0	16	4	0
HROC69	MSS-POLE	18	0	0	0	0	0	13	5	0
HT115	MSS-POLE	18	0	1	0	0	0	13	4	0
SNU-81	MSS-POLE	27	0	0	0	0	0	17	9	1

## Sheet: Supplementary Table 5
Supplementary Table S5. Frequency of indels and SNVs per phenotype.
	MSS	MSI	MSS-POLE
Mutation overall	316	137	101
Frameshift deletion	36	33	0
Frameshift insertion	17	14	1
Inframe deletion	3	1	0
Inframe insertion	1	0	0
Dinucleotide substitution	3	0	0
Missense SNVs	169	76	70
Nonsense SNVs	84	13	29
Splice site	3	0	1
Indel frequency	0.18	0.35	0.01
Missense mutation frequency	0.82	0.65	0.99
* Excluding samples derived from the same patient and from neuroendocrine tumors

## Sheet: Supplementary Table 6
Supplementary Table S6. Transitions and transversions spectra.
Sample	C>A	C>G	C>T	T>C	T>A	T>G	#SNV/Sample	MSI status
C106	1	0	1	0	0	0	2	MSS
C32	0	0	2	0	1	0	3	MSS
C70	1	0	0	0	0	0	1	MSS
C75	1	1	1	0	0	0	3	MSS
C80	0	1	3	0	1	0	5	MSS
C84	0	1	4	0	0	0	5	MSS
Caco-2	1	2	1	1	0	0	5	MSS
CaR-1	0	0	1	0	0	0	1	MSS
CL-11	1	0	4	0	0	1	6	MSS
CL-14	1	1	3	0	0	0	5	MSS
CL-40	0	0	3	0	0	0	3	MSS
CoCM-1	0	0	3	0	1	0	4	MSS
COLO 205	0	0	0	0	1	0	1	MSS
COLO 320	1	1	1	0	0	0	3	MSS
COLO 678	0	0	1	0	0	0	1	MSS
COLO 94H	3	0	4	0	0	0	7	MSS
EB	0	0	3	0	0	0	3	MSS
FRI	1	0	5	0	0	0	6	MSS
HCA46	0	0	3	0	0	0	3	MSS
HRA-16	0	0	0	0	0	0	0	MSS
HRA-19	0	0	3	0	0	0	3	MSS
HROC103 T0 M1	1	0	1	1	0	0	3	MSS
HROC107	0	0	5	0	0	0	5	MSS
HROC112Met T0 M2	1	2	2	0	0	0	5	MSS
HROC126	0	0	2	0	0	0	2	MSS
HROC173	2	0	3	0	0	0	5	MSS
HROC18	0	0	3	0	0	0	3	MSS
HROC183	0	0	4	0	0	0	4	MSS
HROC284Met	0	1	4	0	0	0	5	MSS
HROC309	1	0	2	0	0	0	3	MSS
HROC32	0	1	1	0	0	0	2	MSS
HROC334	2	0	2	0	0	0	4	MSS
HROC39	0	0	1	1	0	0	2	MSS
HROC40	0	1	3	0	0	0	4	MSS
HROC43	1	0	1	0	0	0	2	MSS
HROC57	0	0	3	0	1	0	4	MSS
HROC60	1	1	3	1	0	0	6	MSS
HROC80 T1 M1	1	0	1	0	0	1	3	MSS
HT29	2	1	2	0	1	0	6	MSS
HT55	1	1	2	0	4	0	8	MSS
Isreco-1	0	1	3	2	0	0	6	MSS
Isreco-3	0	0	3	2	0	0	5	MSS
JVE017	0	1	0	0	1	0	2	MSS
JVE114	1	0	0	0	0	0	1	MSS
JVE127	0	0	0	0	1	1	2	MSS
KP363T	0	0	2	0	1	0	3	MSS
LIM1863	0	0	1	1	0	0	2	MSS
LIM2099	1	0	0	0	0	0	1	MSS
LS1034	0	0	2	0	0	0	2	MSS
LS123	1	0	5	0	0	0	6	MSS
LS513	0	0	1	0	0	0	1	MSS
MDST8	0	0	0	1	0	0	1	MSS
NCI-H508	0	1	2	0	0	0	3	MSS
NCI-H716	2	0	0	0	0	0	2	MSS
NCI-H747	1	0	4	0	0	0	5	MSS
OUMS-23	0	0	0	1	1	0	2	MSS
RCM-1	1	0	4	0	0	0	5	MSS
SK-CO-1	1	0	0	0	0	0	1	MSS
SNU-1033	0	0	2	0	1	0	3	MSS
SNU-1181	0	0	2	0	1	0	3	MSS
SNU-1197	0	0	4	0	0	0	4	MSS
SNU-1235	1	0	2	1	1	0	5	MSS
SNU-1411	2	0	0	0	1	0	3	MSS
SNU-1460	1	0	2	0	0	0	3	MSS
SNU-254	0	0	3	1	0	1	5	MSS
SNU-61	0	0	3	0	0	0	3	MSS
SNU-70	1	0	2	0	0	0	3	MSS
SNU-977	0	0	2	0	0	0	2	MSS
SNU-C1	1	0	0	0	0	0	1	MSS
SW1116	1	1	4	0	0	0	6	MSS
SW1222	1	0	1	0	0	1	3	MSS
SW1417	0	0	2	0	1	0	3	MSS
SW1463	1	1	2	0	0	0	4	MSS
SW403	3	0	1	0	0	0	4	MSS
SW480	1	0	3	0	0	0	4	MSS
SW620	1	0	4	0	0	0	5	MSS
SW837	1	0	4	0	0	0	5	MSS
SW948	1	1	3	0	1	0	6	MSS
T84	0	1	2	0	0	0	3	MSS
VACO 9P	0	0	1	0	0	0	1	MSS
WiDr	3	1	2	0	1	0	7	MSS
CL-34	1	0	1	2	1	0	5	MSI
Co-115	0	0	1	0	1	0	2	MSI
DLD-1	2	0	7	1	0	1	11	MSI
HCA7	0	0	1	0	0	0	1	MSI
HCT 116	1	0	1	1	0	0	3	MSI
HCT 15	4	1	7	1	0	1	14	MSI
HROC87 T0 M2	2	0	1	0	1	0	4	MSI
KM12	2	1	3	2	0	1	9	MSI
LIM2405	0	0	1	2	1	0	4	MSI
LoVo	0	0	7	1	0	0	8	MSI
LS174T	0	0	3	2	0	0	5	MSI
RKO	0	0	1	4	1	0	6	MSI
SNU-1746	0	0	3	3	1	0	7	MSI
SNU-C5	1	0	2	3	1	0	7	MSI
SW48	1	0	4	1	0	0	6	MSI
TC71	1	0	7	0	0	0	8	MSI
HCA24	5	0	11	2	0	0	18	MSS-POLE
HCC2998	2	1	11	1	1	4	20	MSS-POLE
HROC69	5	0	12	0	0	1	18	MSS-POLE
HT115	4	0	10	1	0	2	17	MSS-POLE
SNU-81	7	1	16	0	0	3	27	MSS-POLE
Total*							482
*Excluding dinucleotide variants in HT55 (TP53:c.638_639TG), LS513 (BRAF:c.610_611TT) and MDST8 (BRAF:c.1798_1799AA:p.V600K)

## Sheet: Supplementary Table 7
Supplementary Table S7. Transitions and transversions frequencies.
SNV	MSS, total SNV count (Frequencya)	MSI, total SNV count (Frequencya)	MSS-POLE, total SNV count (Frequencya)
C>A	44 (0.17)	13 (0.15)	23 (0.23)
C>G	21 (0.08)	2 (0.02)	2 (0.02)
C>T	156 (0.61)	43 (0.48)	60 (0.6)
T>C	11 (0.04)	22 (0.25)	4 (0.04)
T>A	19 (0.074)	7 (0.08)	1 (0.01)
T>G	5 (0.02)	2 (0.02)	10 (0.1)
* Excluding samples derived from the same patient and from neuroendocrine tumors
a. Calculated based on total events in each phenotype: MSS = 256; MSI = 89; MSS-POLE = 100.

## Sheet: Supplementary Table 8
Supplementary Table S8. Non-synonymous SNVs and indels in 103 CRC cell lines (N = 20 genes).
Sample	Chromosome	Position	Reference base	Alternative base	Reference reads	Alternative reads	VAF	Mutation consequence	Cell line phenotype	Gene	Variant	PolyPhen prediction1	polyPhen score1	SIFT prediction1	SIFT score1	ClinVar Accession	Pathogenicity	Cell Model Passports DRV/CPV prediction2	References
C106	chr5	112839301	CA	-	307	327	0.515773	Frameshift deletion	MSS	APC	NM_000038:exon16:c.3707_3708del:p.A1236fs	NA	NA	NA	NA	-	P	not reported	Rowan et al., 2000
C106	chr12	25245351	C	A	337	286	0.459069	Missense mutation	MSS	KRAS	NM_004985:exon2:c.G34T:p.G12C	NA	NA	deleterious - low confidence	0	VCV001701193.12	P	DRV	Mouradov et al., 2014; Medico et al., 2015
C106	chr17	7675995	G	A	0	206	1	Missense mutation	MSS	TP53	NM_000546:exon4:c.C374T:p.T125M	NA	NA	deleterious	0.01	VCV000183748.53	Conflicting	not reported	Mouradov et al., 2014; Liu and Bodmer, 2006
C32	chr5	112839755	T	A	454	498	0.523109	Nonsense mutation	MSS	APC	NM_000038:c.T4161A:p.C1387*	NA	NA	NA	NA	VCV001050660.2	P	not reported	Unreported
C32	chr4	152337831	G	A	356	149	0.29505	Nonsense mutation	MSS	FBXW7	NM_033632:exon5:c.C832T:p.R278*	NA	NA	NA	NA	VCV001701892.1	LP	not reported	Unreported
C32	chr1	114716126	C	T	426	571	0.572718	Missense mutation	MSS	NRAS	NM_002524:exon2:c.G35A:p.G12D	NA	NA	deleterious - low confidence	0.03	VCV000039648.20	LP	not reported	Mouradov et al., 2014; Medico et al., 2015
C32	chr17	7675997	-	C	0	247	1	Frameshift insertion	MSS	TP53	NM_000546:exon4:c.371dupG:p.C124fs	NA	NA	NA	NA	VCV000634664.6	P	not reported	Unreported
C70	chr5	112839519	G	T	0	542	1	Nonsense mutation	MSS	APC	NM_000038:exon16:c.G3925T:p.E1309*	NA	NA	NA	NA	VCV000824390.10	P	not reported	Mouradov et al., 2014; Rowan et al., 2000
C75	chr5	112838420	T	-	151	370	0.710173	Frameshift deletion	MSS	APC	NM_000038:exon16:c.2826delT:p.N942fs	NA	NA	NA	NA	VCV000492659.14	P	not reported	Unreported
C75	chr5	112839204	C	T	381	146	0.27704	Nonsense mutation	MSS	APC	NM_000038:exon16:c.C3610T:p.Q1204*	NA	NA	NA	NA	VCV002583946.1	P	not reported	Unreported
C75	chr5	112840052	TACTTTAT	-	416	156	0.272727	Frameshift deletion	MSS	APC	NM_000038:exon16:c.4458_4465del:p.D1486fs	NA	NA	NA	NA	-	P	not reported	Rowan et al., 2000
C75	chr18	47841840	G	C	0	299	1	Nonsense mutation	MSS	SMAD2	NM_005901:exon11:c.C1391G:p.S464*	NA	NA	NA	NA	-	P	not reported	Unreported
C75	chr17	7674216	C	A	0	336	1	Missense mutation	MSS	TP53	NM_000546:exon7:c.G747T:p.R249S	NA	NA	deleterious	0.01	VCV000012352.33	LP	not reported	Liu and Bodmer, 2006
C80	chr5	112835093	T	A	1	418	0.997613	Nonsense mutation	MSS	APC	NM_000038:exon15:c.T1886A:p.L629*	NA	NA	NA	NA	VCV000584664.5	P	not reported	Mouradov et al., 2014
C80	chr12	25225627	G	A	225	187	0.453883	Missense mutation	MSS	KRAS	NM_004985:exon4:c.C437T:p.A146V	NA	NA	deleterious - low confidence	0	VCV000375962.10	P	not reported	Mouradov et al., 2014; Medico et al., 2015
C80	chr17	31350209	C	T	0	273	1	Nonsense mutation	MSS	NF1	NM_001042492:exon50:c.C7348T:p.R2450*	NA	NA	NA	NA	VCV000185789.36	P	not reported	Mouradov et al., 2014
C80	chr18	51065518	G	C	0	408	1	Missense mutation	MSS	SMAD4	NM_005359:exon9:c.G1051C:p.D351H	probably damaging	1	deleterious - low confidence	0	VCV000375998.2	LP	not reported	Mouradov et al., 2014
C80	chr17	7676215	G	A	0	345	1	Nonsense mutation	MSS	TP53	NM_000546:exon4:c.C154T:p.Q52*	NA	NA	NA	NA	VCV001455400.8	P	not reported	Mouradov et al., 2014; Liu and Bodmer, 2006
C84	chr5	112815507	C	T	186	277	0.598272	Nonsense mutation	MSS	APC	NM_000038:exon9:c.C847T:p.R283*	NA	NA	NA	NA	VCV000184999.30	P	not reported	Mouradov et al., 2014
C84	chr5	112835125	C	T	355	221	0.383681	Missense mutation	MSS	APC	NM_000038:exon15:c.C1918T:p.R640W	probably damaging	1	deleterious - low confidence	0.01	VCV000428132.15	LP	not reported	Mouradov et al., 2014
C84	chr5	112839942	C	T	446	265	0.372714	Nonsense mutation	MSS	APC	NM_000038:exon16:c.C4348T:p.R1450*	NA	NA	NA	NA	VCV000194585.21	P	not reported	Mouradov et al., 2014
C84	chr12	25245350	C	G	231	432	0.651584	Missense mutation	MSS	KRAS	NM_004985:exon2:c.G35C:p.G12A	NA	NA	deleterious - low confidence	0	VCV000045122.13	P	DRV	Mouradov et al., 2014; Medico et al., 2015
C84	chr17	7670685	G	A	1	577	0.99827	Nonsense mutation	MSS	TP53	NM_000546:exon10:c.C1024T:p.R342*	NA	NA	NA	NA	VCV000182970.40	P	not reported	Mouradov et al., 2014; Liu and Bodmer, 2006
Caco-2	chr5	112839693	C	T	0	1100	1	Nonsense mutation	MSS	APC	NM_000038:exon16:c.C4099T:p.Q1367*	NA	NA	NA	NA	VCV000376060.17	P	not reported	Berg et al., 2017; Mouradov et al., 2014
Caco-2	chr3	41225572	G	C	186	332	0.640927	Missense mutation	MSS	CTNNB1	NM_001904:exon5:c.G734C:p.G245A	NA	NA	NA	NA	-	Unknown	not reported	Berg et al., 2017;Mouradov et al., 2014
Caco-2	chr1	64864840	T	C	0	524	1	Missense mutation	MSS	JAK1	NM_002227:exon8:c.A1123G:p.I375V	benign	0	tolerated	0.14	VCV001930268.3	Uncertain Significance	unclassified	Berg et al., 2017; Mouradov et al., 2014
Caco-2	chr18	51065518	G	C	2	423	0.995294	Missense mutation	MSS	SMAD4	NM_005359:exon9:c.G1051C:p.D351H	probably damaging	1	deleterious - low confidence	0	VCV000375998.2	LP	not reported	Mouradov et al., 2014
Caco-2	chr17	7674921	C	A	0	752	1	Nonsense mutation	MSS	TP53	NM_000546:exon6:c.G610T:p.E204*	NA	NA	NA	NA	VCV000977783.3	P	not reported	Berg et al., 2017;Mouradov et al., 2014;Liu and Bodmer, 2006
CaR-1	chr17	7673806	C	T	0	458	1	Missense mutation	MSS	TP53	NM_000546:exon8:c.G814A:p.V272M	NA	NA	deleterious	0	VCV000185814.22	P	DRV	Ghandi et al., 2019; Liu and Bodmer, 2006
CL-11	chr5	112839625	C	A	0	825	1	Nonsense mutation	MSS	APC	NM_000038:exon16:c.C4031A:p.S1344*	NA	NA	NA	NA	VCV000428137.8	P	DRV	b
CL-11	chr4	152326214	C	T	231	213	0.47973	Missense mutation	MSS	FBXW7	NM_033632:exon10:c.G1436A:p.R479Q	probably damaging	1	deleterious - low confidence	0	VCV000376419.1	P	DRV	a; b
CL-11	chr12	25227341	T	G	303	318	0.512077	Missense mutation	MSS	KRAS	NM_004985:exon3:c.A183C:p.Q61H	NA	NA	deleterious - low confidence	0	VCV000045117.6	P	DRV	Medico et al., 2015
CL-11	chr12	25245345	C	T	312	288	0.48	Missense mutation	MSS	KRAS	NM_004985:exon2:c.G40A:p.V14I	NA	NA	deleterious - low confidence	0	VCV000012589.53	P	DRV	Berg et al., 2017
CL-11	chr18	47841837	C	T	0	255	1	Missense mutation	MSS	SMAD2	NM_005901:exon11:c.G1394A:p.S465N	NA	NA	NA	NA	-	LP	unclassified	b
CL-11	chr17	7674887	C	T	0	402	1	Missense mutation	MSS	TP53	NM_000546:exon6:c.G644A:p.S215N	NA	NA	deleterious	0	VCV000376662.12	P	DRV	Berg et al., 2017;Ghandi et al., 2019
CL-14	chr5	112838689	C	A	0	460	1	Nonsense mutation	MSS	APC	NM_000038:exon16:c.C3095A:p.S1032*	NA	NA	NA	NA	VCV002583704.1	P	DRV	b
CL-14	chr5	112838725	C	T	0	450	1	Missense mutation	MSS	APC	NM_000038:exon16:c.C3131T:p.S1044L	benign	0.167	deleterious - low confidence	0	VCV000485119.17	Uncertain Significance	unclassified	b
CL-14	chr5	112838797	C	G	0	500	1	Nonsense mutation	MSS	APC	NM_000038:exon16:c.C3203G:p.S1068*	NA	NA	NA	NA	VCV000490258.5	P	DRV	b
CL-14	chr1	64869349	C	T	260	257	0.497099	Missense mutation	MSS	JAK1	NM_002227:exon6:c.G609A:p.M203I	NA	NA	NA	NA	-	Unknown	unclassified	b
CL-14	chr17	7673803	G	A	0	291	1	Missense mutation	MSS	TP53	NM_000546:exon8:c.C817T:p.R273C	NA	NA	deleterious	0	VCV000043594.47	P	DRV	Ghandi et al., 2019
CL-34	chr5	112819284	G	T	362	394	0.521164	Nonsense mutation	MSI	APC	NM_000038:exon10:c.G1252T:p.E418*	NA	NA	NA	NA	-	P	not reported	a
CL-34	chr5	112838160	C	T	410	434	0.514218	Missense mutation	MSI	APC	NM_000038:exon16:c.C2566T:p.R856C	probably damaging	0.963	deleterious - low confidence	0.01	VCV000469755.18	Conflicting	not reported	a
CL-34	chr5	112840254	-	A	342	336	0.495575	Frameshift insertion	MSI	APC	NM_000038:exon16:c.4661dupA:p.E1554fs	NA	NA	NA	NA	-	P	not reported	a
CL-34	chr7	140753336	A	T	354	311	0.467669	Missense mutation	MSI	BRAF	NM_004333:exon15:c.T1799A:p.V600E	probably damaging	0.935	deleterious - low confidence	0	VCV000013961.129	P	DRV	Mouradov et al., 2014; Medico et al., 2015
CL-34	chr18	47845716	T	C	478	814	0.630031	Missense mutation	MSI	SMAD2	NM_005901:exon9:c.A1082G:p.N361S	possibly damaging	0.461	deleterious - low confidence	0	VCV002738550.1	Uncertain Significance	not reported	Unreported
CL-34	chr17	7669645	T	-	341	356	0.51076	Frameshift deletion	MSI	TP53	NM_000546:exon11:c.1146delA:p.K382fs	NA	NA	NA	NA	VCV001408583.6	LP	not reported	Berg et al., 2017
CL-34	chr17	7675233	A	G	321	250	0.437828	Missense mutation	MSI	TP53	NM_000546:exon5:c.T379C:p.S127P	NA	NA	deleterious	0	VCV000934410.10	LP	not reported	Berg et al., 2017
CL-40	chr5	112838220	C	T	337	323	0.489394	Nonsense mutation	MSS	APC	NM_000038:exon16:c.C2626T:p.R876*	NA	NA	NA	NA	VCV000216014.33	P	DRV	b
CL-40	chr5	112839989	T	-	304	330	0.520505	Frameshift deletion	MSS	APC	NM_000038:exon16:c.4395delT:p.S1465fs	NA	NA	NA	NA	VCV001070413.8	P	DRV	b
CL-40	chr12	25245350	C	T	267	412	0.606775	Missense mutation	MSS	KRAS	NM_004985:exon2:c.G35A:p.G12D	NA	NA	deleterious - low confidence	0.04	VCV000012582.33	P	DRV	Medico et al., 2015
CL-40	chr3	179199150	GAA	-	161	136	0.457912	Inframe deletion	MSS	PIK3CA	NM_006218:exon2:c.325_327del:p.109_109del	NA	NA	NA	NA	-	P	DRV	b
CL-40	chr17	7674220	C	T	238	250	0.512295	Missense mutation	MSS	TP53	NM_000546:exon7:c.G743A:p.R248Q	NA	NA	deleterious	0.01	VCV000012356.73	P	DRV/CPV	Ghandi et al., 2019
Co-115	chr5	112828967	A	-	176	189	0.517808	Frameshift deletion	MSI	APC	NM_000038:exon14:c.1738delA:p.K580fs	NA	NA	NA	NA	-	P	not reported	Berg et al., 2017
Co-115	chr5	112840254	-	A	275	293	0.515845	Frameshift insertion	MSI	APC	NM_000038:exon16:c.4661dupA:p.E1554fs	NA	NA	NA	NA	-	P	not reported	Berg et al., 2017
Co-115	chr1	26773685	C	-	437	259	0.372126	Frameshift deletion	MSI	ARID1A	NM_006015:exon16:c.3972delC:p.Y1324fs	NA	NA	NA	NA	-	P	not reported	Unreported
Co-115	chr7	140753336	A	T	252	314	0.55477	Missense mutation	MSI	BRAF	NM_004333:exon15:c.T1799A:p.V600E	probably damaging	0.935	deleterious - low confidence	0	VCV000013961.129	P	DRV	Berg et al., 2017;Mouradov et al., 2014
Co-115	chr1	64841314	T	-	250	275	0.52381	Frameshift deletion	MSI	JAK1	NM_002227:exon19:c.2580delA:p.K860fs	NA	NA	NA	NA	-	LP	not reported	Berg et al., 2017
Co-115	chr1	64864947	T	-	418	46	0.0991379	Frameshift deletion	MSI	JAK1	NM_002227:exon8:c.1016delA:p.N339fs	NA	NA	NA	NA	-	LP	not reported	Unreported
Co-115	chr10	87933224	-	G	208	171	0.451187	Frameshift insertion	MSI	PTEN	NM_000314:exon5:c.466dupG:p.Y155fs	NA	NA	NA	NA	VCV000634798.2	p	not reported	Berg et al., 2017; Ahmed et al., 2013
Co-115	chr10	87957915	C	T	265	300	0.530973	Nonsense mutation	MSI	PTEN	NM_000314:exon7:c.C697T:p.R233*	NA	NA	NA	NA	VCV000007813.88	LP	not reported	Berg et al., 2017; Ahmed et al., 2013
Co-115	chr18	47845414	A	-	0	300	1	Frameshift deletion	MSI	SMAD2	NM_005901:exon10:c.1206delT:p.F402fs	NA	NA	NA	NA	-	P	not reported	Unreported
CoCM-1	chr5	112839516	A	T	463	250	0.350631	Nonsense mutation	MSS	APC	NM_000038:exon16:c.A3922T:p.K1308*	NA	NA	NA	NA	-	P	not reported	Unreported
CoCM-1	chr3	179234225	G	A	417	187	0.309603	Missense mutation	MSS	PIK3CA	NM_006218:exon21:c.G3068A:p.R1023Q	NA	NA	NA	NA	-	Unknown	not reported	Unreported
CoCM-1	chr18	51065438	G	A	0	134	1	Missense mutation	MSS	SMAD4	NM_005359:exon9:c.G971A:p.C324Y	NA	NA	NA	NA	-	LP	not reported	Unreported
CoCM-1	chr17	7674945	G	A	0	490	1	Nonsense mutation	MSS	TP53	NM_000546:exon6:c.C586T:p.R196*	NA	NA	NA	NA	VCV000043589.46	P	not reported	Liu and Bodmer, 2006
COLO 205	chr5	112840254	-	A	0	381	1	Frameshift insertion	MSS	APC	NM_000038:exon16:c.4661dupA:p.E1554fs	NA	NA	NA	NA	-	P	DRV	Berg et al., 2017; Ku et al., 2010
COLO 205	chr7	140753336	A	T	170	315	0.649485	Missense mutation	MSS	BRAF	NM_004333:exon15:c.T1799A:p.V600E	probably damaging	0.935	deleterious - low confidence	0	VCV000013961.129	P	DRV	Berg et al., 2017; Mouradov et al., 2014; Medico et al., 2015
COLO 205	chr17	7676036	CAGACGGAAACCG	-	0	383	1	Frameshift deletion	MSS	TP53	NM_000546:exon4:c.321_333del:p.Y107fs	NA	NA	NA	NA	VCV000945818.6	P	not reported	Berg et al., 2017			-
COLO 205	chr17	7676051	GCTGCCCTGGT	-	0	383	1	Frameshift deletion	MSS	TP53	NM_000546:exon4:c.308_318del:p.Y103fs	NA	NA	NA	NA	VCV003236859.1	LP	not reported	Berg et al., 2017
COLO 320	chr5	112838026	C	G	0	405	1	Nonsense mutation	MSS	APC	NM_000038:exon16:c.C2432G:p.S811*	NA	NA	NA	NA	VCV002203685.2	P	DRV	Berg et al., 2017; Mouradov et al., 2014
COLO 320	chr1	64839770	C	A	197	162	0.451253	Missense mutation	MSS	JAK1	NM_002227:exon20:c.G2675T:p.C892F	probably damaging	0.999	deleterious	0.01	-	Unknown	not reported	Berg et al., 2017
COLO 320	chr17	7674221	G	A	0	408	1	Missense mutation	MSS	TP53	NM_000546:exon7:c.C742T:p.R248W	NA	NA	deleterious	0	VCV000437017.6	P	DRV/CPV	Berg et al., 2017; Mouradov et al., 2014; Liu and Bodmer, 2006; Ahmed et al., 2013
COLO 678	chr5	112840254	-	A	0	508	1	Frameshift insertion	MSS	APC	NM_000038:exon16:c.4661dupA:p.E1554fs	NA	NA	NA	NA	-	P	DRV	Rowan et al., 2000; Ku et al., 2010
COLO 678	chr12	25245350	C	T	254	447	0.63766	Missense mutation	MSS	KRAS	NM_004985:exon2:c.G35A:p.G12D	NA	NA	deleterious - low confidence	0.04	VCV000012582.33	P	DRV	Mouradov et al., 2014; Medico et al., 2015
COLO 94H	chr5	112815564	C	T	210	248	0.541485	Nonsense mutation	MSS	APC	NM_000038:exon9:c.C904T:p.R302*	NA	NA	NA	NA	VCV000000798.35	LP	not reported	Unreported
COLO 94H	chr5	112840311	G	T	257	280	0.521415	Nonsense mutation	MSS	APC	NM_000038:exon16:c.G4717T:p.E1573*	NA	NA	NA	NA	-	P	not reported	Unreported
COLO 94H	chr12	25245350	C	T	469	697	0.59777	Missense mutation	MSS	KRAS	NM_004985:exon2:c.G35A:p.G12D	NA	NA	deleterious - low confidence	0.04	VCV000012582.33	P	DRV	Medico et al., 2015
COLO 94H	chr17	31223524	G	A	1	473	0.99789	Missense mutation	MSS	NF1	NM_001042492:exon16:c.G1802A:p.R601Q	possibly damaging	0.863	deleterious - low confidence	0	VCV000404478.11	Uncertain Significance	not reported	Unreported
COLO 94H	chr3	179218303	G	A	399	179	0.309689	Missense mutation	MSS	PIK3CA	NM_006218:exon10:c.G1633A:p.E545K	probably damaging	0.912	deleterious	0	VCV000013655.45	P	DRV	Medico et al., 2015
COLO 94H	chr18	51065522	G	T	0	579	1	Missense mutation	MSS	SMAD4	NM_005359:exon9:c.G1055T:p.G352V	probably damaging	1	deleterious - low confidence	0	-	LP	not reported	Unreported
COLO 94H	chr17	7674859	C	A	0	534	1	Missense mutation	MSS	TP53	NM_000546:exon6:c.G672T:p.E224D	NA	NA	deleterious	0.01	VCV001493447.6	P	DRV	Unreported
DLD-1	chr5	112837774	G	T	296	304	0.506667	Missense mutation	MSI	APC	NM_000038:exon16:c.G2180T:p.R727M	probably damaging	1	deleterious - low confidence	0	-	Unknown	not reported	Berg et al., 2017; Mouradov et al., 2014
DLD-1	chr5	112838573	G	T	314	300	0.488599	Missense mutation	MSI	APC	NM_000038:exon16:c.G2979T:p.K993N	NA	NA	NA	NA	-	Unknown	not reported	Berg et al., 2017; Mouradov et al., 2014
DLD-1	chr5	112839842	C	-	0	608	1	Frameshift deletion	MSI	APC	NM_000038:exon16:c.4248delC:p.G1416fs	NA	NA	NA	NA	-	P	not reported	Berg et al., 2017
DLD-1	chr5	112842090	C	T	316	256	0.447552	Nonsense mutation	MSI	APC	NM_000038:exon16:c.C6496T:p.R2166*	NA	NA	NA	NA	VCV000438883.13	P	not reported	Berg et al., 2017; Mouradov et al., 2014
DLD-1	chr5	112843167	C	T	345	281	0.448882	Missense mutation	MSI	APC	NM_000038:exon16:c.C7573T:p.R2525C	probably damaging	0.998	deleterious - low confidence	0	VCV000218507.25	Uncertain Significance	not reported	Berg et al., 2017; Mouradov et al., 2014
DLD-1	chr1	26780602	C	T	373	385	0.507916	Missense mutation	MSI	ARID1A	NM_006015:exon20:c.C6704T:p.A2235V	NA	NA	NA	NA	-	Unknown	not reported	Unreported
DLD-1	chr12	4276108	T	G	302	279	0.480207	Missense mutation	MSI	CCND2	NM_001759:exon2:c.T299G:p.L100R	NA	NA	NA	NA	-	Unknown	unclassified	Berg et al., 2017; Mouradov et al., 2014
DLD-1	chr7	55160299	A	G	408	136	0.25	Missense mutation	MSI	EGFR	NM_005228:exon12:c.A1459G:p.K487E	NA	NA	NA	NA	-	Unknown	not reported	Berg et al., 2017
DLD-1	chr4	152352646	G	A	345	333	0.49115	Missense mutation	MSI	FBXW7	NM_018315:exon1:c.C85T:p.P29S	NA	NA	NA	NA	-	Unknown	not reported	Berg et al., 2017; Mouradov et al., 2014
DLD-1	chr12	25245347	C	T	247	229	0.481092	Missense mutation	MSI	KRAS	NM_004985:exon2:c.G38A:p.G13D	NA	NA	deleterious - low confidence	0.04	VCV000012580.49	P	DRV	Berg et al., 2017; Mouradov et al., 2014; Ahmed et al., 2013
DLD-1	chr17	31357071	C	T	241	206	0.46085	Missense mutation	MSI	NF1	NM_001042492:exon53:c.C7850T:p.A2617V	NA	NA	NA	NA	VCV000187029.15	Uncertain Significance	unclassified	Mouradov et al., 2014
DLD-1	chr17	7674241	G	A	263	269	0.505639	Missense mutation	MSI	TP53	NM_000546:exon7:c.C722T:p.S241F	NA	NA	deleterious	0	VCV000012359.31	P	DRV	Berg et al., 2017; Liu and Bodmer, 2006
EB	chr5	112838220	C	T	289	539	0.650966	Nonsense mutation	MSS	APC	NM_000038:exon16:c.C2626T:p.R876*	NA	NA	NA	NA	VCV000216014.33	P	not reported	Berg et al., 2017
EB	chr5	112839978	-	AG	479	204	0.298682	Frameshift insertion	MSS	APC	NM_000038:exon16:c.4384_4385insAG:p.K1462fs	NA	NA	NA	NA	-	P	not reported	Berg et al., 2017
EB	chr12	25245350	C	T	380	374	0.496021	Missense mutation	MSS	KRAS	NM_004985:exon2:c.G35A:p.G12D	NA	NA	deleterious - low confidence	0.04	VCV000012582.33	P	DRV	Berg et al., 2017
EB	chr3	179218303	G	A	163	308	0.653928	Missense mutation	MSS	PIK3CA	NM_006218:exon10:c.G1633A:p.E545K	probably damaging	0.912	deleterious	0	VCV000013655.45	P	DRV	Berg et al., 2017; Ahmed et al., 2013
FRI	chr5	112767257	G	A	384	307	0.444284	Missense mutation	MSS	APC	NM_000038:exon4:c.G289A:p.G97R	probably damaging	0.976	deleterious - low confidence	0	VCV001697514.9	P	not reported	Berg et al., 2017
FRI	chr5	112838220	C	T	353	421	0.543928	Nonsense mutation	MSS	APC	NM_000038:exon16:c.C2626T:p.R876*	NA	NA	NA	NA	VCV000216014.33	P	not reported	Berg et al., 2017
FRI	chr5	112840254	-	A	320	266	0.453925	Frameshift insertion	MSS	APC	NM_000038:exon16:c.4661dupA:p.E1554fs	NA	NA	NA	NA	-	P	not reported	Berg et al., 2017
FRI	chr12	25245347	C	T	0	411	1	Missense mutation	MSS	KRAS	NM_004985:exon2:c.G38A:p.G13D	NA	NA	deleterious - low confidence	0.04	VCV000012580.49	P	DRV	Berg et al., 2017; Ahmed et al., 2013
FRI	chr3	179218303	G	A	248	188	0.431193	Missense mutation	MSS	PIK3CA	NM_006218:exon10:c.G1633A:p.E545K	probably damaging	0.912	deleterious	0	VCV000013655.45	P	DRV	Berg et al., 2017; Ahmed et al., 2013
FRI	chr18	51067096	C	T	0	306	1	Missense mutation	MSS	SMAD4	NM_005359:exon10:c.C1217T:p.A406V	probably damaging	0.978	deleterious - low confidence	0	VCV000422930.14	Uncertain Significance	not reported	Unreported
FRI	chr17	7673790	C	A	0	430	1	Missense mutation	MSS	TP53	NM_000546:exon8:c.G830T:p.C277F	NA	NA	deleterious	0	VCV000458567.12	LP	not reported	Berg et al., 2017;Ahmed et al., 2013;Gayet et al., 2001
HCA24	chr5	112815564	C	T	261	261	0.5	Nonsense mutation	MSS-POLE	APC	NM_000038:exon9:c.C904T:p.R302*	NA	NA	NA	NA	VCV000000798.35	LP	not reported	Unreported
HCA24	chr5	112838934	C	T	379	353	0.48224	Nonsense mutation	MSS-POLE	APC	NM_000038:exon16:c.C3340T:p.R1114*	NA	NA	NA	NA	VCV000236589.38	P	not reported	Unreported
HCA24	chr5	112839793	C	T	406	356	0.467192	Missense mutation	MSS-POLE	APC	NM_000038:exon16:c.C4199T:p.S1400L	probably damaging	0.968	deleterious - low confidence	0	VCV000075618.8	Uncertain Significance	not reported	Unreported
HCA24	chr3	41235800	G	A	257	228	0.470103	Missense mutation	MSS-POLE	CTNNB1	NM_001904:exon11:c.G1760A:p.R587Q	probably damaging	0.99	deleterious - low confidence	0	VCV001209323.3	Uncertain Significance	not reported	Unreported
HCA24	chr4	152323033	G	A	315	317	0.501582	Nonsense mutation	MSS-POLE	FBXW7	NM_033632:exon12:c.C1972T:p.R658*	NA	NA	NA	NA	-	P	not reported	Unreported
HCA24	chr4	152324237	G	A	293	275	0.484155	Missense mutation	MSS-POLE	FBXW7	NM_033632:exon11:c.C1802T:p.S601F	NA	NA	NA	NA	-	Unknown	not reported	Unreported
HCA24	chr4	152337919	C	A	212	219	0.508121	Missense mutation	MSS-POLE	FBXW7	NM_033632:exon5:c.G744T:p.E248D	NA	NA	NA	NA	-	Unknown	not reported	Unreported
HCA24	chr17	31181743	G	T	411	113	0.215649	Nonsense mutation	MSS-POLE	NF1	NM_001042492:exon7:c.G688T:p.E230*	NA	NA	NA	NA	VCV000851567.6	P	not reported	Unreported
HCA24	chr17	31214493	G	T	321	277	0.463211	Nonsense mutation	MSS-POLE	NF1	NM_001042492:exon13:c.G1435T:p.E479*	NA	NA	NA	NA	-	P	not reported	Unreported
HCA24	chr17	31265251	G	T	437	32	0.0682303	Nonsense mutation	MSS-POLE	NF1	NM_001042492:exon36:c.G4747T:p.E1583*	NA	NA	NA	NA	VCV000971976.8	P	not reported	Unreported
HCA24	chr3	179199088	G	A	305	261	0.461131	Missense mutation	MSS-POLE	PIK3CA	NM_006218:exon2:c.G263A:p.R88Q	probably damaging	0.971	deleterious	0	VCV000376049.16	P	DRV	Unreported
HCA24	chr3	179219592	T	C	182	167	0.47851	Missense mutation	MSS-POLE	PIK3CA	NM_006218:exon12:c.T1768C:p.W590R	NA	NA	NA	NA	-	Unknown	not reported	Unreported
HCA24	chr3	179225967	C	T	221	190	0.462287	Missense mutation	MSS-POLE	PIK3CA	NM_006218:exon17:c.C2422T:p.R808W	probably damaging	1	deleterious	0	VCV000403912.8	Uncertain Significance	not reported	Unreported
HCA24	chr12	132673261	G	A	305	333	0.521944	Missense mutation	MSS-POLE	POLE	NM_006231:exon14:c.C1376T:p.S459F	probably damaging	1	deleterious	0	VCV002836186.1	P	not reported	Unreported
HCA24	chr10	87933148	G	A	0	519	1	Missense mutation	MSS-POLE	PTEN	NM_000314:exon5:c.G389A:p.R130Q	probably damaging	0.998	deleterious	0	VCV000007829.64	P	DRV	Unreported
HCA24	chr18	51047203	G	T	258	271	0.512287	Nonsense mutation	MSS-POLE	SMAD4	NM_005359:exon2:c.G157T:p.E53*	NA	NA	NA	NA	-	P	not reported	Unreported
HCA24	chr18	51065524	T	C	337	325	0.490937	Missense mutation	MSS-POLE	SMAD4	NM_005359:exon9:c.T1057C:p.Y353H	NA	NA	NA	NA	-	Unknown	not reported	Unreported
HCA24	chr18	51078420	G	A	285	279	0.494681	Missense mutation	MSS-POLE	SMAD4	NM_005359:exon12:c.G1612A:p.E538K	benign	0.169	deleterious - low confidence	0	VCV001385805.7	Uncertain Significance	not reported	Unreported
HCA46	chr5	112780895	C	T	167	297	0.640086	Nonsense mutation	MSS	APC	NM_000038:exon6:c.C637T:p.R213*	NA	NA	NA	NA	VCV000140952.31	P	not reported	Rowan et al., 2000; Mouradov et al., 2014
HCA46	chr1	26774497	C	T	0	460	1	Nonsense mutation	MSS	ARID1A	NM_006015:exon18:c.C4270T:p.Q1424*	NA	NA	NA	NA	-	P	not reported	Mouradov et al., 2014
HCA46	chr3	179218294	G	A	155	306	0.663774	Missense mutation	MSS	PIK3CA	NM_006218:exon10:c.G1624A:p.E542K	probably damaging	0.915	deleterious	0	VCV000031944.32	P	DRV	Mouradov et al., 2014; Medico et al., 2015
HCA46	chr17	7673804	CA	-	0	422	1	Frameshift deletion	MSS	TP53	NM_000546:exon8:c.815_816del:p.V272fs	NA	NA	NA	NA	VCV001076516.6	P	not reported	Liu and Bodmer, 2006
HCA7	chr5	112828966	-	A	199	228	0.533958	Frameshift insertion	MSI	APC	NM_000038:exon14:c.1738dupA:p.V579fs	NA	NA	NA	NA	-	P	not reported	Unreported
HCA7	chr5	112840254	-	A	338	347	0.506569	Frameshift insertion	MSI	APC	NM_000038:exon16:c.4661dupA:p.E1554fs	NA	NA	NA	NA	-	P	not reported	Rowan et al., 2000; Ku et al., 2010
HCA7	chr4	152326215	G	A	1	239	0.995833	Nonsense mutation	MSI	FBXW7	NM_033632:exon10:c.C1435T:p.R479*	NA	NA	NA	NA	-	P	not reported	Mouradov et al., 2014
HCA7	chr17	7673718	G	-	441	522	0.542056	Frameshift deletion	MSI	TP53	NM_000546:exon8:c.902delC:p.P301fs	NA	NA	NA	NA	VCV000233908.6	P	not reported	Liu and Bodmer, 2006
HCA7	chr17	7676153	G	-	527	436	0.452752	Frameshift deletion	MSI	TP53	NM_000546:exon4:c.216delC:p.P72fs	NA	NA	NA	NA	-	P	not reported	Unreported
HCC2998	chr5	112775709	G	T	191	195	0.505181	Missense mutation	MSS-POLE	APC	NM_000038:exon5:c.G503T:p.R168I	NA	NA	NA	NA	-	Unknown	unclassified	Mouradov et al., 2014
HCC2998	chr5	112837588	T	A	283	253	0.472015	Nonsense mutation	MSS-POLE	APC	NM_000038:exon16:c.T1994A:p.L665*	NA	NA	NA	NA	VCV000940857.12	P	DRV	Berg et al., 2017; Mouradov et al., 2014
HCC2998	chr5	112839942	C	T	398	356	0.472149	Nonsense mutation	MSS-POLE	APC	NM_000038:exon16:c.C4348T:p.R1450*	NA	NA	NA	NA	VCV000194585.21	P	not reported	Berg et al., 2017; Mouradov et al., 2014
HCC2998	chr5	112841185	C	A	292	291	0.499142	Missense mutation	MSS-POLE	APC	NM_000038:exon16:c.C5591A:p.S1864Y	NA	NA	NA	NA	-	Unknown	unclassified	Berg et al., 2017; Mouradov et al., 2014
HCC2998	chr5	112842094	T	G	324	343	0.514243	Missense mutation	MSS-POLE	APC	NM_000038:exon16:c.T6500G:p.I2167S	probably damaging	0.986	deleterious - low confidence	0	-	Unknown	unclassified	Berg et al., 2017; Mouradov et al., 2014
HCC2998	chr5	112843754	T	G	330	369	0.527897	Missense mutation	MSS-POLE	APC	NM_000038:exon16:c.T8160G:p.N2720K	NA	NA	NA	NA	-	Unknown	unclassified	Berg et al., 2017; Mouradov et al., 2014
HCC2998	chr1	26779863	C	T	313	319	0.504747	Nonsense mutation	MSS-POLE	ARID1A	NM_006015:exon20:c.C5965T:p.R1989*	NA	NA	NA	NA	VCV000225842.1	P	DRV	Mouradov et al., 2014
HCC2998	chr17	39724865	G	A	338	329	0.493253	Missense mutation	MSS-POLE	ERBB2	NM_004448:exon20:c.G2447A:p.R816H	benign	0.31	tolerated	0.42	VCV002170265.2	Uncertain Significance	unclassified	Berg et al., 2017;Mouradov et al., 2014
HCC2998	chr4	152322940	G	A	253	230	0.47619	Missense mutation	MSS-POLE	FBXW7	NM_033632:exon12:c.C2065T:p.R689W	NA	NA	NA	NA	-	P	DRV	Berg et al., 2017; Mouradov et al., 2014
HCC2998	chr1	64839756	C	T	275	258	0.484053	Missense mutation	MSS-POLE	JAK1	NM_002227:exon20:c.G2689A:p.E897K	benign	0.208	tolerated	0.15	VCV001025029.6	Uncertain Significance	unclassified	Berg et al., 2017; Mouradov et al., 2014
HCC2998	chr1	64844203	C	T	199	201	0.5025	Missense mutation	MSS-POLE	JAK1	NM_002227:exon17:c.G2264A:p.R755Q	NA	NA	NA	NA	-	Unknown	unclassified	Berg et al., 2017; Mouradov et al., 2014
HCC2998	chr12	25225628	C	T	181	170	0.48433	Missense mutation	MSS-POLE	KRAS	NM_004985:exon4:c.G436A:p.A146T	NA	NA	deleterious - low confidence	0	VCV000197243.23	P	DRV	Berg et al., 2017; Mouradov et al., 2014; Medico et al., 2015
HCC2998	chr17	31223549	A	C	231	216	0.483221	Missense mutation	MSS-POLE	NF1	NM_001042492:exon16:c.A1827C:p.K609N	NA	NA	NA	NA	-	Unknown	unclassified	Berg et al., 2017
HCC2998	chr12	132676598	G	C	336	355	0.513748	Missense mutation	MSS-POLE	POLE	NM_006231:exon9:c.C857G:p.P286R	probably damaging	1	deleterious	0	VCV000376500.8	P	DRV	Mouradov et al., 2014
HCC2998	chr10	87894082	A	G	270	262	0.492481	Missense mutation	MSS-POLE	PTEN	NM_000314:exon2:c.A137G:p.Y46C	probably damaging	0.997	deleterious	0	VCV001368242.4	P	DRV	Berg et al., 2017; Mouradov et al., 2014
HCC2998	chr10	87933148	G	A	264	292	0.52518	Missense mutation	MSS-POLE	PTEN	NM_000314:exon5:c.G389A:p.R130Q	probably damaging	0.998	deleterious	0	VCV000007829.64	P	DRV	Berg et al., 2017; Mouradov et al., 2014
HCC2998	chr10	87961113	T	G	268	240	0.472441	Missense mutation	MSS-POLE	PTEN	NM_000314:exon8:c.T1021G:p.F341V	probably damaging	0.998	deleterious	0	VCV000495806.2	P	DRV	Berg et al., 2017; Mouradov et al., 2014
HCC2998	chr18	47848510	C	T	257	248	0.491089	Missense mutation	MSS-POLE	SMAD2	NM_005901:exon8:c.G962A:p.R321Q	NA	NA	NA	NA	-	P	DRV	Mouradov et al., 2014
HCC2998	chr18	47848645	G	A	286	242	0.458333	Missense mutation	MSS-POLE	SMAD2	NM_005901:exon8:c.C827T:p.S276L	probably damaging	0.998	deleterious - low confidence	0	VCV002097524.2	LP	not reported	Mouradov et al., 2014
HCC2998	chr17	7674894	G	A	384	799	0.675402	Nonsense mutation	MSS-POLE	TP53	NM_000546:exon6:c.C637T:p.R213*	NA	NA	NA	NA	VCV000043590.47	P	DRV	Berg et al., 2017; Mouradov et al., 2014
HCT 116	chr3	41224643	CTT	-	364	313	0.462334	Inframe deletion	MSI	CTNNB1	NM_001904:exon3:c.131_133del:p.44_45del	NA	NA	NA	NA	-	P	DRV	Berg et al., 2017;Rowan et al., 2000
HCT 116	chr12	25245347	C	T	361	282	0.438569	Missense mutation	MSI	KRAS	NM_004985:exon2:c.G38A:p.G13D	NA	NA	deleterious - low confidence	0.04	-	P	DRV	Berg et al., 2017; Mouradov et al., 2014; Medico et al., 2015; Gayet et al., 2001
HCT 116	chr17	31201136	C	A	248	183	0.424594	Missense mutation	MSI	NF1	NM_001042492:exon10:c.C1162A:p.P388T	NA	NA	NA	NA	-	Unknown	not reported	Berg et al., 2017
HCT 116	chr3	179234297	A	G	325	318	0.494557	Missense mutation	MSI	PIK3CA	NM_006218:exon21:c.A3140G:p.H1047R	benign	0.088	deleterious	0	VCV000013652.76	P	DRV	Berg et al., 2017;Mouradov et al., 2014;Medico et al., 2015;Ahmed et al., 2013
HCT 15	chr5	112837774	G	T	370	330	0.471429	Missense mutation	MSI	APC	NM_000038:exon16:c.G2180T:p.R727M	probably damaging	1	deleterious - low confidence	0	-	Unknown	unclassified	Berg et al., 2017; Mouradov et al., 2014
HCT 15	chr5	112838573	G	T	336	337	0.500743	Missense mutation	MSI	APC	NM_000038:exon16:c.G2979T:p.K993N	NA	NA	NA	NA	-	Unknown	unclassified	Berg et al., 2017; Mouradov et al., 2014
HCT 15	chr5	112839842	C	-	0	722	1	Frameshift deletion	MSI	APC	NM_000038:exon16:c.4248delC:p.G1416fs	NA	NA	NA	NA	-	P	DRV	Berg et al., 2017
HCT 15	chr5	112840277	G	T	293	292	0.499145	Missense mutation	MSI	APC	NM_000038:exon16:c.G4683T:p.K1561N	probably damaging	0.988	deleterious - low confidence	0	VCV000537447.12	Uncertain Significance	unclassified	Berg et al., 2017; Mouradov et al., 2014
HCT 15	chr5	112840931	A	G	365	376	0.507422	Missense mutation	MSI	APC	NM_000038:exon16:c.A5337G:p.I1779M	benign	0	tolerated - low confidence	1	VCV000411404.21	Conflicting	unclassified	Berg et al., 2017; Mouradov et al., 2014
HCT 15	chr5	112842090	C	T	327	281	0.462171	Nonsense mutation	MSI	APC	NM_000038:exon16:c.C6496T:p.R2166*	NA	NA	NA	NA	VCV000438883.13	P	DRV	Berg et al., 2017; Mouradov et al., 2014
HCT 15	chr5	112843242	G	C	450	209	0.317147	Missense mutation	MSI	APC	NM_000038:exon16:c.G7648C:p.E2550Q	probably damaging	0.996	deleterious - low confidence	0	-	Unknown	unclassified	Berg et al., 2017; Mouradov et al., 2014
HCT 15	chr12	4276108	T	G	331	308	0.482003	Missense mutation	MSI	CCND2	NM_001759:exon2:c.T299G:p.L100R	NA	NA	NA	NA	-	Unknown	unclassified	Berg et al., 2017;Mouradov et al., 2014
HCT 15	chr12	25245347	C	T	292	248	0.459259	Missense mutation	MSI	KRAS	NM_004985:exon2:c.G38A:p.G13D	NA	NA	deleterious - low confidence	0.04	VCV000012580.49	P	DRV	Berg et al., 2017; Mouradov et al., 2014; Ahmed et al., 2013
HCT 15	chr17	31159026	C	A	218	187	0.461728	Missense mutation	MSI	NF1	NM_001042492:exon3:c.C221A:p.A74D	benign	0	deleterious - low confidence	0.02	VCV000068311.1	Not provided	unclassified	Berg et al., 2017; Mouradov et al., 2014
HCT 15	chr17	31350290	C	T	216	228	0.513514	Missense mutation	MSI	NF1	NM_001042492:exon50:c.C7429T:p.P2477S	NA	NA	NA	NA	VCV000954665.5	Uncertain Significance	unclassified	Berg et al., 2017; Mouradov et al., 2014
HCT 15	chr17	31357071	C	T	270	290	0.517857	Missense mutation	MSI	NF1	NM_001042492:exon53:c.C7850T:p.A2617V	NA	NA	NA	NA	VCV000187029.15	Uncertain Significance	unclassified
HCT 15	chr3	179218303	G	A	279	229	0.450787	Missense mutation	MSI	PIK3CA	NM_006218:exon10:c.G1633A:p.E545K	probably damaging	0.912	deleterious	0	VCV000013655.45	P	DRV	Berg et al., 2017;Mouradov et al., 2014;Medico et al., 2015;Ahmed et al., 2013
HCT 15	chr3	179218315	G	A	258	228	0.469136	Missense mutation	MSI	PIK3CA	NM_006218:exon10:c.G1645A:p.D549N	possibly damaging	0.646	deleterious	0.04	VCV000375900.1	P	DRV	Berg et al., 2017; Mouradov et al., 2014; Ahmed et al., 2013
HCT 15	chr17	7674241	G	A	324	309	0.488152	Missense mutation	MSI	TP53	NM_000546:exon7:c.C722T:p.S241F	NA	NA	deleterious	0	VCV000012359.31	P	DRV	Berg et al., 2017;Ghandi et al., 2019;Ahmed et al., 2013
HRA-16	chr5	112780852	-	G	0	642	1	Frameshift insertion	MSS	APC	NM_000038:exon6:c.595dupG:p.V198fs	NA	NA	NA	NA	-	P	not reported	Unreported
HRA-16	chr1	26761462	C	-	0	414	1	Frameshift deletion	MSS	ARID1A	NM_006015:exon6:c.2240delC:p.A747fs	NA	NA	NA	NA	-	P	not reported	Unreported
HRA-19	chr5	112819245	C	T	1	551	0.998188	Nonsense mutation	MSS	APC	NM_000038:exon10:c.C1213T:p.R405*	NA	NA	NA	NA	VCV000127275.45	P	not reported	Mouradov et al., 2014
HRA-19	chr5	112839942	C	T	0	580	1	Nonsense mutation	MSS	APC	NM_000038:exon16:c.C4348T:p.R1450*	NA	NA	NA	NA	VCV000194585.21	P	not reported	Rowan et al., 2000; Mouradov et al., 2014
HRA-19	chr17	7673802	C	T	0	607	1	Missense mutation	MSS	TP53	NM_000546:exon8:c.G818A:p.R273H	NA	NA	tolerated	0.07	VCV000012366.60	P	DRV	Mouradov et al., 2014; Liu and Bodmer, 2006
HROC103 T0 M1	chr5	112839627	G	T	0	827	1	Nonsense mutation	MSS	APC	NM_000038:exon16:c.G4033T:p.E1345*	NA	NA	NA	NA	VCV000449334.4	P	not reported	Unreported
HROC103 T0 M1	chr4	152346992	G	A	0	719	1	Nonsense mutation	MSS	FBXW7	NM_033632:exon4:c.C664T:p.R222*	NA	NA	NA	NA	-	P	not reported	Unreported
HROC103 T0 M1	chr17	7673763	T	C	1	950	0.998948	Missense mutation	MSS	TP53	NM_000546:exon8:c.A857G:p.E286G	NA	NA	deleterious	0	VCV000376590.7	LP	not reported	Mullins et al., 2019
HROC107	chr5	112792446	C	T	0	284	1	Nonsense mutation	MSS	APC	NM_000038:exon7:c.C646T:p.R216*	NA	NA	NA	NA	VCV000127312.30	P	not reported	Unreported
HROC107	chr1	26760957	T	-	265	192	0.420131	Frameshift deletion	MSS	ARID1A	NM_006015:exon5:c.2022delT:p.S674fs	NA	NA	NA	NA	-	P	not reported	Unreported
HROC107	chr12	25245350	C	T	0	584	1	Missense mutation	MSS	KRAS	NM_004985:exon2:c.G35A:p.G12D	NA	NA	deleterious - low confidence	0.04	VCV000012582.33	P	DRV	Mullins et al., 2019
HROC107	chr3	179218294	G	A	213	353	0.623675	Missense mutation	MSS	PIK3CA	NM_006218:exon10:c.G1624A:p.E542K	probably damaging	0.915	deleterious	0	VCV000031944.32	P	DRV	Unreported
HROC107	chr18	51076662	C	T	0	344	1	Nonsense mutation	MSS	SMAD4	NM_005359:exon11:c.C1333T:p.R445*	NA	NA	NA	NA	VCV000024850.15	P	not reported	Unreported
HROC107	chr17	7673767	C	T	0	647	1	Missense mutation	MSS	TP53	NM_000546:exon8:c.G853A:p.E285K	NA	NA	deleterious	0	VCV000420133.20	LP	not reported	Mullins et al., 2019
HROC112Met T0 M2	chr5	112838007	C	T	224	210	0.483871	Nonsense mutation	MSS	APC	NM_000038:exon16:c.C2413T:p.R805*	NA	NA	NA	NA	VCV000127281.32	P	not reported	Unreported
HROC112Met T0 M2	chr5	112840064	T	-	265	293	0.52509	Frameshift deletion	MSS	APC	NM_000038:exon16:c.4470delT:p.H1490fs	NA	NA	NA	NA	VCV000545843.2	P	not reported	Unreported
HROC112Met T0 M2	chr17	39715819	C	G	380	345	0.475862	Missense mutation	MSS	ERBB2	NM_004448:exon12:c.C1393G:p.L465V	NA	NA	NA	NA	-	Unknown	not reported	Unreported
HROC112Met T0 M2	chr1	114716126	C	A	301	240	0.443623	Missense mutation	MSS	NRAS	NM_002524:exon2:c.G35T:p.G12V	NA	NA	deleterious - low confidence	0	VCV000040470.19	LP	not reported	Unreported
HROC112Met T0 M2	chr18	51067019	G	C	0	193	1	Missense mutation	MSS	SMAD4	NM_005359:exon10:c.G1140C:p.R380S	probably damaging	0.993	deleterious - low confidence	0.01	VCV001731235.1	Uncertain Significance	not reported	Unreported
HROC112Met T0 M2	chr17	7674220	C	T	0	216	1	Missense mutation	MSS	TP53	NM_000546:exon7:c.G743A:p.R248Q	NA	NA	deleterious	0.01	VCV000012356.73	P	DRV/CPV	Unreported
HROC126	chr5	112839827	T	-	0	653	1	Frameshift deletion	MSS	APC	NM_000038:exon16:c.4233delT:p.S1411fs	NA	NA	NA	NA	-	P	not reported	Unreported
HROC126	chr18	51048839	C	T	0	324	1	Nonsense mutation	MSS	SMAD4	NM_005359:exon3:c.C403T:p.R135*	NA	NA	NA	NA	VCV000024802.14	P	not reported	Unreported
HROC126	chr17	7674945	G	A	0	377	1	Nonsense mutation	MSS	TP53	NM_000546:exon6:c.C586T:p.R196*	NA	NA	NA	NA	VCV000043589.46	P	not reported	Unreported
HROC173	chr5	112838539	C	A	182	393	0.683478	Nonsense mutation	MSS	APC	NM_000038:exon16:c.C2945A:p.S982*	NA	NA	NA	NA	-	P	not reported	Unreported
HROC173	chr5	112839879	C	T	407	185	0.3125	Nonsense mutation	MSS	APC	NM_000038:exon16:c.C4285T:p.Q1429*	NA	NA	NA	NA	VCV000376063.4	P	not reported	Unreported
HROC173	chr12	25245350	C	A	1	428	0.997669	Missense mutation	MSS	KRAS	NM_004985:exon2:c.G35T:p.G12V	NA	NA	deleterious - low confidence	0.01	VCV000012583.50	P	DRV	Mullins et al., 2019
HROC173	chr3	179218303	G	A	131	138	0.513011	Missense mutation	MSS	PIK3CA	NM_006218:exon10:c.G1633A:p.E545K	probably damaging	0.912	deleterious	0	VCV000013655.45	P	DRV	Unreported
HROC173	chr17	7674957	G	A	0	440	1	Nonsense mutation	MSS	TP53	NM_000546:exon6:c.C574T:p.Q192*	NA	NA	NA	NA	VCV000406579.19	P	not reported	Unreported
HROC18	chr5	112801318	G	-	288	335	0.537721	Frameshift deletion	MSS	APC	NM_000038:exon8:c.769delG:p.A257fs	NA	NA	NA	NA	-	P	not reported	Unreported
HROC18	chr5	112839845	TA	-	353	310	0.467572	Frameshift deletion	MSS	APC	NM_000038:exon16:c.4251_4252del:p.I1417fs	NA	NA	NA	NA	-	P	not reported	Unreported
HROC18	chr12	25225627	G	A	169	360	0.680529	Missense mutation	MSS	KRAS	NM_004985:exon4:c.C437T:p.A146V	NA	NA	deleterious - low confidence	0	VCV000375962.10	P	not reported	Medico et al., 2015
HROC18	chr3	179218303	G	A	289	212	0.423154	Missense mutation	MSS	PIK3CA	NM_006218:exon10:c.G1633A:p.E545K	probably damaging	0.912	deleterious	0	VCV000013655.45	P	DRV	Medico et al., 2015
HROC18	chr17	7673803	G	A	0	337	1	Missense mutation	MSS	TP53	NM_000546:exon8:c.C817T:p.R273C	NA	NA	deleterious	0	VCV000043594.47	P	DRV	Mullins et al., 2019
HROC183	chr5	112815507	C	T	159	153	0.490385	Nonsense mutation	MSS	APC	NM_000038:exon9:c.C847T:p.R283*	NA	NA	NA	NA	VCV000184999.30	P	not reported	Unreported
HROC183	chr5	112839942	C	T	238	254	0.51626	Nonsense mutation	MSS	APC	NM_000038:exon16:c.C4348T:p.R1450*	NA	NA	NA	NA	VCV000194585.21	P	not reported	Unreported
HROC183	chr12	25245350	C	T	0	461	1	Missense mutation	MSS	KRAS	NM_004985:exon2:c.G35A:p.G12D	NA	NA	deleterious - low confidence	0.04	VCV000012582.33	P	DRV	Mullins et al., 2019
HROC183	chr17	7673776	G	A	0	568	1	Missense mutation	MSS	TP53	NM_000546:exon8:c.C844T:p.R282W	NA	NA	deleterious	0	VCV000012364.68	LP	not reported	Mullins et al., 2019
HROC284Met	chr5	112838934	C	T	391	383	0.494832	Nonsense mutation	MSS	APC	NM_000038:exon16:c.C3340T:p.R1114*	NA	NA	NA	NA	VCV000236589.38	P	not reported	Unreported
HROC284Met	chr5	112839538	C	G	397	367	0.480366	Nonsense mutation	MSS	APC	NM_000038:exon16:c.C3944G:p.S1315*	NA	NA	NA	NA	VCV000958617.10	P	not reported	Unreported
HROC284Met	chr1	26761012	C	T	0	795	1	Nonsense mutation	MSS	ARID1A	NM_006015:exon5:c.C2077T:p.R693*	NA	NA	NA	NA	-	P	not reported	Unreported
HROC284Met	chr1	114716126	C	T	0	709	1	Missense mutation	MSS	NRAS	NM_002524:exon2:c.G35A:p.G12D	NA	NA	deleterious - low confidence	0.03	VCV000039648.20	LP	not reported	Unreported
HROC284Met	chr17	7675088	C	T	0	388	1	Missense mutation	MSS	TP53	NM_000546:exon5:c.G524A:p.R175H	NA	NA	tolerated	0.08	VCV000012374.66	P	DRV	Unreported
HROC309	chr5	112837552	G	A	183	191	0.510695	.	MSS	APC	Splicing	NA	NA	NA	NA	VCV000217939.17	LP	not reported
HROC309	chr5	112839054	G	T	365	335	0.478571	Nonsense mutation	MSS	APC	NM_000038:exon16:c.G3460T:p.E1154*	NA	NA	NA	NA	VCV001731643.4	P	not reported	Unreported
HROC309	chr17	7674945	G	A	1	574	0.998261	Nonsense mutation	MSS	TP53	NM_000546:exon6:c.C586T:p.R196*	NA	NA	NA	NA	VCV000043589.46	P	not reported	Unreported
HROC32	chr5	112839492	AA	-	0	614	1	Frameshift deletion	MSS	APC	NM_000038:exon16:c.3898_3899del:p.N1300fs	NA	NA	NA	NA	-	P	not reported	Unreported
HROC32	chr12	25245350	C	G	239	241	0.502083	Missense mutation	MSS	KRAS	NM_004985:exon2:c.G35C:p.G12A	NA	NA	deleterious - low confidence	0	VCV000045122.13	P	DRV	Medico et al., 2015
HROC32	chr17	7673776	G	A	0	808	1	Missense mutation	MSS	TP53	NM_000546:exon8:c.C844T:p.R282W	NA	NA	deleterious	0	VCV000012364.68	LP	not reported	Mullins et al., 2019
HROC334	chr5	112834951	G	T	205	213	0.509569	Nonsense mutation	MSS	APC	NM_000038:exon15:c.G1744T:p.E582*	NA	NA	NA	NA	VCV001012192.1	P	not reported	Unreported
HROC334	chr5	112835125	C	T	308	249	0.447038	Missense mutation	MSS	APC	NM_000038:exon15:c.C1918T:p.R640W	probably damaging	1	deleterious - low confidence	0.01	VCV000428132.15	LP	not reported	Unreported
HROC334	chr5	112840254	-	A	307	291	0.486622	Frameshift insertion	MSS	APC	NM_000038:exon16:c.4661dupA:p.E1554fs	NA	NA	NA	NA	-	P	not reported	Unreported
HROC334	chr12	25245350	C	A	605	518	0.461264	Missense mutation	MSS	KRAS	NM_004985:exon2:c.G35T:p.G12V	NA	NA	deleterious - low confidence	0.01	VCV000012583.50	P	DRV	Unreported
HROC334	chr18	51058223	C	T	0	331	1	Nonsense mutation	MSS	SMAD4	NM_005359:exon6:c.C766T:p.Q256*	NA	NA	NA	NA	VCV002117814.2	P	not reported	Unreported
HROC334	chr17	7676169	G	-	0	442	1	Frameshift deletion	MSS	TP53	NM_000546:exon4:c.200delC:p.P67fs	NA	NA	NA	NA	VCV001784383.2	P	not reported	Unreported
HROC39	chr5	112839903	A	-	0	724	1	Frameshift deletion	MSS	APC	NM_000038:exon16:c.4309delA:p.K1437fs	NA	NA	NA	NA	-	P	not reported	Unreported
HROC39	chr4	152347070	T	C	2	208	0.990476	Missense mutation	MSS	FBXW7	NM_033632:exon4:c.A586G:p.T196A	benign	0.011	tolerated - low confidence	0.2	-	Unknown	not reported	Unreported
HROC39	chr12	25225628	C	T	186	350	0.652985	Missense mutation	MSS	KRAS	NM_004985:exon4:c.G436A:p.A146T	NA	NA	deleterious - low confidence	0	VCV000197243.23	P	DRV	Medico et al., 2015
HROC39	chr18	51058187	CCTCAGCC	-	0	346	1	Frameshift deletion	MSS	SMAD4	NM_005359:exon6:c.730_737del:p.P244fs	NA	NA	NA	NA	-	P	not reported	Unreported
HROC40	chr5	112839879	C	T	0	466	1	Nonsense mutation	MSS	APC	NM_000038:exon16:c.C4285T:p.Q1429*,	NA	NA	NA	NA	VCV000376063.4	P	not reported	Unreported
HROC40	chr1	26697244	G	C	110	6	0.0517241	Missense mutation	MSS	ARID1A	NM_006015:exon1:c.G841C:p.A281P	unknown	0	deleterious - low confidence	0.01	-	Unknown	not reported	Unreported
HROC40	chr12	25245347	C	T	157	318	0.669474	Missense mutation	MSS	KRAS	NM_004985:exon2:c.G38A:p.G13D	NA	NA	deleterious - low confidence	0.04	VCV000012580.49	P	DRV	Mullins et al., 2019
HROC40	chr17	7673823	C	T	0	383	1	Missense mutation	MSS	TP53	NM_000546:exon8:c.G797A:p.G266E	NA	NA	deleterious	0.01	VCV000161516.19	LP	not reported	Mullins et al., 2019
HROC43	chr5	112839879	C	T	0	547	1	Nonsense mutation	MSS	APC	NM_000038:exon16:c.C4285T:p.Q1429*	NA	NA	NA	NA	VCV000376063.4	P	not reported	Lange 2014
HROC43	chr12	25245350	C	A	461	366	0.442563	Missense mutation	MSS	KRAS	NM_004985:exon2:c.G35T:p.G12V	NA	NA	deleterious - low confidence	0.01	VCV000012583.50	P	DRV	Mullins et al., 2019; Lange 2014
HROC43	chr17	7674240	G	-	0	471	1	Frameshift deletion	MSS	TP53	NM_000546:exon7:c.723delC:p.S241fs	NA	NA	NA	NA	VCV001074338.13	P	not reported	Mullins et al., 2019
HROC57	chr5	112837959	C	T	4	250	0.984252	Nonsense mutation	MSS	APC	NM_000038:exon16:c.C2365T:p.Q789*	NA	NA	NA	NA	VCV000092341.16	P	not reported	Unreported
HROC57	chr7	140753336	A	T	223	436	0.661608	Missense mutation	MSS	BRAF	NM_004333:exon15:c.T1799A:p.V600E	probably damaging	0.935	deleterious - low confidence	0	VCV000013961.129	P	DRV	Gock et al., 2018
HROC57	chr18	51058355	G	A	51	206	0.801556	Nonsense mutation	MSS	SMAD4	NM_005359:exon7:c.G803A:p.W268*	NA	NA	NA	NA	VCV002026527.2	P	not reported	Unreported
HROC57	chr17	7674894	G	A	1	626	0.998405	Nonsense mutation	MSS	TP53	NM_000546:exon6:c.C637T:p.R213*	NA	NA	NA	NA	VCV000043590.47	P	DRV	Unreported
HROC60	chr5	112839726	C	T	0	983	1	Nonsense mutation	MSS	APC	NM_000038:exon16:c.C4132T:p.Q1378*	NA	NA	NA	NA	VCV000376061.6	P	not reported	Unreported
HROC60	chr4	152326005	C	A	147	220	0.599455	.	MSS	FBXW7	Splicing	NA	NA	NA	NA	-	Unknown	not reported
HROC60	chr12	25227348	G	C	316	291	0.479407	Missense mutation	MSS	KRAS	NM_004985:exon3:c.C176G:p.A59G	NA	NA	deleterious - low confidence	0.04	-	P	not reported	Unreported
HROC60	chr17	31169937	G	A	462	147	0.241379	Missense mutation	MSS	NF1	NM_001042492:exon5:c.G526A:p.D176N	NA	NA	NA	NA	-	Unknown	not reported	Unreported
HROC60	chr18	47848573	T	C	0	446	1	Missense mutation	MSS	SMAD2	NM_005901:exon8:c.A899G:p.D300G	NA	NA	NA	NA	-	LP	not reported	Unreported
HROC60	chr17	7673802	C	T	0	438	1	Missense mutation	MSS	TP53	NM_000546:exon8:c.G818A:p.R273H	NA	NA	tolerated	0.07	VCV000012366.60	P	DRV	Mullins et al., 2019
HROC69	chr5	112828863	C	T	288	123	0.29927	Missense mutation	MSS-POLE	APC	NM_000038:exon14:c.C1634T:p.A545V	NA	NA	NA	NA	-	Unknown	not reported	Unreported
HROC69	chr5	112828919	C	T	385	164	0.298725	Nonsense mutation	MSS-POLE	APC	NM_000038:exon14:c.C1690T:p.R564*	NA	NA	NA	NA	VCV000000808.37	P	not reported	Unreported
HROC69	chr5	112839942	C	T	271	424	0.610072	Nonsense mutation	MSS-POLE	APC	NM_000038:exon16:c.C4348T:p.R1450*	NA	NA	NA	NA	VCV000194585.21	P	not reported	Kuehn et al., 2016
HROC69	chr1	26772940	G	A	413	205	0.331715	Missense mutation	MSS-POLE	ARID1A	NM_006015:exon14:c.G3668A:p.R1223H	NA	NA	deleterious - low confidence	0	VCV000434341.6	Likely benign	not reported	Unreported
HROC69	chr1	26779076	G	T	345	180	0.342857	Missense mutation	MSS-POLE	ARID1A	NM_006015:exon20:c.G5178T:p.E1726D	NA	NA	NA	NA	-	Unknown	not reported	Unreported
HROC69	chr12	4274050	C	A	441	30	0.0636943	Missense mutation	MSS-POLE	CCND2	NM_001759:exon1:c.C10A:p.L4M	possibly damaging	0.761	deleterious	0.04	-	Unknown	not reported	Unreported
HROC69	chr3	41224596	G	T	547	202	0.269693	Missense mutation	MSS-POLE	CTNNB1	NM_001904:exon3:c.G84T:p.Q28H	benign	0.005	tolerated - low confidence	0.15	VCV001718025.5	Uncertain Significance	not reported	Unreported
HROC69	chr3	41227271	G	A	395	427	0.519465	Missense mutation	MSS-POLE	CTNNB1	NM_001904:exon7:c.G1000A:p.E334K	probably damaging	0.968	deleterious - low confidence	0	-	Unknown	unclassified	Unreported
HROC69	chr3	41234188	C	T	324	325	0.50077	Missense mutation	MSS-POLE	CTNNB1	NM_001904:exon10:c.C1574T:p.A525V	benign	0.003	deleterious - low confidence	0.01	VCV001911769.3	Uncertain Significance	not reported	Unreported
HROC69	chr7	55173086	C	T	527	452	0.461696	Missense mutation	MSS-POLE	EGFR	NM_005228:exon17:c.C2023T:p.R675W	probably damaging	0.999	deleterious - low confidence	0	VCV002960460.1	Uncertain Significance	not reported	Unreported
HROC69	chr4	152352547	C	T	251	211	0.45671	Missense mutation	MSS-POLE	FBXW7	NM_018315:exon1:c.G184A:p.G62R	NA	NA	NA	NA	-	Unknown	not reported	Unreported
HROC69	chr3	179219717	T	G	83	207	0.713793	Nonsense mutation	MSS-POLE	PIK3CA	NM_006218:exon12:c.T1893G:p.Y631*	NA	NA	NA	NA	-	Unknown	not reported	Unreported
HROC69	chr12	132673703	C	A	336	154	0.314286	Missense mutation	MSS-POLE	POLE	NM_006231:exon13:c.G1231T:p.V411L	probably damaging	1	deleterious	0	VCV000376503.3	P	not reported	Unreported
HROC69	chr10	87864488	G	T	215	211	0.495305	Nonsense mutation	MSS-POLE	PTEN	NM_000314:exon1:c.G19T:p.E7*	NA	NA	NA	NA	VCV000493079.24	P	not reported	Kuehn et al., 2016
HROC69	chr10	87894078	G	A	190	198	0.510309	Missense mutation	MSS-POLE	PTEN	NM_000314:exon2:c.G133A:p.V45I	possibly damaging	0.455	deleterious	0.01	VCV001053430.7	P	not reported	Unreported
HROC69	chr10	87933148	G	A	213	158	0.425876	Missense mutation	MSS-POLE	PTEN	NM_000314:exon5:c.G389A:p.R130Q	probably damaging	0.998	deleterious	0	VCV000007829.64	P	DRV	Unreported
HROC69	chr10	87933184	G	A	217	168	0.436364	Missense mutation	MSS-POLE	PTEN	NM_000314:exon5:c.G425A:p.R142Q	probably damaging	0.978	tolerated	0.13	VCV000237646.15	Uncertain Significance	not reported	Unreported
HROC69	chr17	7673704	G	A	0	754	1	Nonsense mutation	MSS-POLE	TP53	NM_000546:exon8:c.C916T:p.R306*	NA	NA	NA	NA	VCV000142144.99	P	not reported	Mullins et al., 2019
HROC80 T1 M1	chr5	112838308	G	-	727	344	0.321195	Frameshift deletion	MSS	APC	NM_000038:exon16:c.2714delG:p.S905fs	NA	NA	NA	NA	-	P	not reported	Unreported
HROC80 T1 M1	chr5	112840254	-	A	265	570	0.682635	Frameshift insertion	MSS	APC	NM_000038:exon16:c.4661dupA:p.E1554fs	NA	NA	NA	NA	-	P	not reported	Unreported
HROC80 T1 M1	chr3	41227331	A	C	0	568	1	Missense mutation	MSS	CTNNB1	NM_001904:exon7:c.A1060C:p.K354Q	NA	NA	NA	NA	-	Unknown	not reported	Unreported
HROC80 T1 M1	chr12	25245350	C	A	0	511	1	Missense mutation	MSS	KRAS	NM_004985:exon2:c.G35T:p.G12V	NA	NA	deleterious - low confidence	0.01	VCV000012583.50	P	DRV	Medico et al., 2015
HROC80 T1 M1	chr17	7674229	C	T	0	592	1	Missense mutation	MSS	TP53	NM_000546:exon7:c.G734A:p.G245D	NA	NA	deleterious	0	VCV000012355.23	LP	not reported	Mullins et al., 2019
HROC87 T0 M2	chr5	112780890	A	-	278	223	0.44511	Frameshift deletion	MSI	APC	NM_000038:exon6:c.632delA:p.E211fs	NA	NA	NA	NA	-	P	not reported	Unreported
HROC87 T0 M2	chr5	112815548	CA	-	310	315	0.504	Frameshift deletion	MSI	APC	NM_000038:exon9:c.888_889del:p.S296fs	NA	NA	NA	NA	-	P	not reported	Unreported
HROC87 T0 M2	chr5	112840254	-	A	323	314	0.492936	Frameshift insertion	MSI	APC	NM_000038:exon16:c.4661dupA:p.E1554fs	NA	NA	NA	NA	-	P	not reported	Unreported
HROC87 T0 M2	chr1	26697059	G	T	279	254	0.476548	Missense mutation	MSI	ARID1A	NM_006015:exon1:c.G656T:p.R219L	unknown	0	deleterious - low confidence	0	-	Unknown	not reported	Unreported
HROC87 T0 M2	chr7	140753336	A	T	568	293	0.340302	Missense mutation	MSI	BRAF	NM_004333:exon15:c.T1799A:p.V600E	probably damaging	0.935	deleterious - low confidence	0	VCV000013961.129	P	DRV	Mouradov et al., 2014; Medico et al., 2015
HROC87 T0 M2	chr17	39711955	C	T	396	379	0.489032	Missense mutation	MSI	ERBB2	NM_004448:exon8:c.C929T:p.S310F	probably damaging	0.984	deleterious	0	VCV000376189.1	LP	not reported	Unreported
HROC87 T0 M2	chr17	39723375	G	T	624	96	0.133333	Missense mutation	MSI	ERBB2	NM_004448:exon17:c.G2003T:p.G668V	NA	NA	NA	NA	-	Unknown	not reported	Unreported
HT115	chr5	112819024	C	T	236	225	0.488069	Missense mutation	MSS-POLE	APC	NM_000038:exon10:c.C992T:p.S331L	probably damaging	0.914	deleterious - low confidence	0	VCV000470160.14	Uncertain Significance	unclassified	Mouradov et al., 2014
HT115	chr5	112839181	C	A	285	291	0.505208	Nonsense mutation	MSS-POLE	APC	NM_000038:exon16:c.C3587A:p.S1196*	NA	NA	NA	NA	-	P	DRV	Mouradov et al., 2014
HT115	chr5	112840254	-	A	265	244	0.479371	Frameshift insertion	MSS-POLE	APC	NM_000038:exon16:c.4661dupA:p.E1554fs	NA	NA	NA	NA	-	P	DRV	b
HT115	chr7	140794387	C	T	570	331	0.36737	Missense mutation	MSS-POLE	BRAF	NM_004333:exon8:c.G1061A:p.R354Q	possibly damaging	0.449	deleterious - low confidence	0	VCV001320770.6	Uncertain Significance	unclassified	Mouradov et al., 2014
HT115	chr4	152328233	G	A	199	184	0.480418	Missense mutation	MSS-POLE	FBXW7	NM_033632:exon9:c.C1393T:p.R465C	probably damaging	1	deleterious - low confidence	0	VCV000376414.11	P	DRV	Mouradov et al., 2014
HT115	chr4	152352536	T	G	332	332	0.5	Missense mutation	MSS-POLE	FBXW7	NM_018315:exon1:c.A195C:p.E65D	NA	NA	NA	NA	-	Unknown	unclassified	Mouradov et al., 2014
HT115	chr4	152411763	C	T	317	290	0.477759	Missense mutation	MSS-POLE	FBXW7	NM_001257069:exon4:c.G41A:p.R14Q	unknown	0	tolerated - low confidence	0.12	-	P	DRV	Mouradov et al., 2014
HT115	chr12	68839780	G	T	677	331	0.328373	Missense mutation	MSS-POLE	MDM2	NM_002392:exon11:c.G1425T:p.K475N	NA	NA	NA	NA	-	Unknown	unclassified	Mouradov et al., 2014
HT115	chr17	31223505	G	T	308	307	0.499187	Nonsense mutation	MSS-POLE	NF1	NM_001042492:exon16:c.G1783T:p.E595*	NA	NA	NA	NA	VCV000655568.5	P	DRV	b
HT115	chr17	31235623	C	T	245	213	0.465066	Nonsense mutation	MSS-POLE	NF1	NM_001042492:exon28:c.C3721T:p.R1241*	NA	NA	NA	NA	VCV000000361.35	P	DRV	b
HT115	chr17	31356478	A	G	242	217	0.472767	Missense mutation	MSS-POLE	NF1	NM_001042492:exon52:c.A7634G:p.D2545G	NA	NA	NA	NA	-	Unknown	unclassified	Mouradov et al., 2014
HT115	chr1	114713818	G	A	202	177	0.467018	Missense mutation	MSS-POLE	NRAS	NM_002524:exon3:c.C272T:p.A91V	NA	NA	deleterious - low confidence	0.03	VCV001003866.8	Conflicting	unclassified	Mouradov et al., 2014
HT115	chr3	179199088	G	A	422	230	0.352761	Missense mutation	MSS-POLE	PIK3CA	NM_006218:exon2:c.G263A:p.R88Q	probably damaging	0.971	deleterious	0	VCV000376049.16	P	DRV	Mouradov et al., 2014
HT115	chr3	179203693	A	C	426	267	0.385281	Missense mutation	MSS-POLE	PIK3CA	NM_006218:exon5:c.A963C:p.E321D	benign	0	tolerated	0.52	-	Unknown	unclassified	Mouradov et al., 2014
HT115	chr3	179224714	G	A	204	299	0.594433	Missense mutation	MSS-POLE	PIK3CA	NM_006218:exon16:c.G2309A:p.R770Q	benign	0.265	deleterious	0.02	VCV000872914.4	Uncertain Significance	unclassified	Mouradov et al., 2014
HT115	chr12	132673703	C	A	472	219	0.316932	Missense mutation	MSS-POLE	POLE	NM_006231:exon13:c.G1231T:p.V411L	probably damaging	1	deleterious	0	VCV000376503.3	P	DRV	Mouradov et al., 2014
HT115	chr18	47848510	C	T	276	220	0.443548	Missense mutation	MSS-POLE	SMAD2	NM_005901:exon8:c.G962A:p.R321Q	NA	NA	NA	NA	-	P	DRV	Mouradov et al., 2014
HT115	chr17	7674894	G	A	351	393	0.528226	Nonsense mutation	MSS-POLE	TP53	NM_000546:exon6:c.C637T:p.R213*	NA	NA	NA	NA	VCV000043590.47	P	DRV	Mouradov et al., 2014; Ghandi et al., 2019
HT29	chr5	112838151	G	T	516	248	0.324607	Nonsense mutation	MSS	APC	NM_000038:exon16:c.G2557T:p.E853*	NA	NA	NA	NA	VCV001071632.8	P	DRV	Berg et al., 2017; Mouradov et al., 2014
HT29	chr5	112840254	-	A	267	427	0.615274	Frameshift insertion	MSS	APC	NM_000038:exon16:c.4661dupA:p.E1554fs	NA	NA	NA	NA	-	P	not reported	Berg et al., 2017; Ku et al., 2010
HT29	chr7	140753336	A	T	457	187	0.290373	Missense mutation	MSS	BRAF	NM_004333:exon15:c.T1799A:p.V600E	probably damaging	0.935	deleterious - low confidence	0	VCV000013961.129	P	DRV	Berg et al., 2017;Rowan et al., 2000;Mouradov et al., 2014;Medico et al., 2015
HT29	chr7	140834757	G	C	185	499	0.729532	Missense mutation	MSS	BRAF	NM_004333:exon3:c.C356G:p.T119S	NA	NA	NA	NA	-	Unknown	unclassified	Berg et al., 2017;Mouradov et al., 2014
HT29	chr3	179210279	C	A	232	608	0.72381	Missense mutation	MSS	PIK3CA	NM_006218:exon8:c.C1345A:p.P449T	probably damaging	0.99	deleterious	0	VCV001333250.5	P	DRV	Mouradov et al., 2014; Ahmed et al., 2013
HT29	chr18	51059892	C	T	0	424	1	Nonsense mutation	MSS	SMAD4	NM_005359:exon8:c.C931T:p.Q311*	NA	NA	NA	NA	VCV000230663.4	P	DRV	Mouradov et al., 2014
HT29	chr17	7673802	C	T	0	456	1	Missense mutation	MSS	TP53	NM_000546:exon8:c.G818A:p.R273H	NA	NA	tolerated	0.07	VCV000012366.60	P	DRV	Mouradov et al., 2014; Ahmed et al., 2013
HT55	chr5	112838985	C	T	395	436	0.524669	Nonsense mutation	MSS	APC	NM_000038:exon16:c.C3391T:p.Q1131*	NA	NA	NA	NA	VCV000236590.11	P	DRV	Rowan et al., 2000; Mouradov et al., 2014
HT55	chr5	112839501	C	T	415	338	0.448871	Nonsense mutation	MSS	APC	NM_000038:exon16:c.C3907T:p.Q1303*	NA	NA	NA	NA	VCV001076263.9	P	DRV	Rowan et al., 2000; Mouradov et al., 2014
HT55	chr5	112839983	A	T	420	483	0.534884	Missense mutation	MSS	APC	NM_000038:exon16:c.A4389T:p.R1463S	benign	0.208	deleterious - low confidence	0	-	Unknown	unclassified	Mouradov et al., 2014
HT55	chr7	140754187	T	A	506	385	0.432099	Missense mutation	MSS	BRAF	NM_004333:exon14:c.A1741T:p.N581Y	probably damaging	1	deleterious - low confidence	0	-	P	DRV	Mouradov et al., 2014;Medico et al., 2015
HT55	chr3	41225750	A	T	482	478	0.497917	Missense mutation	MSS	CTNNB1	NM_001904:exon6:c.A825T:p.L275F	NA	NA	NA	NA	-	Unknown	unclassified	Mouradov et al., 2014
HT55	chr4	152382314	T	A	2	513	0.996117	Missense mutation	MSS	FBXW7	NM_001013415:exon1:c.A22T:p.T8S	NA	NA	NA	NA	-	Unknown	unclassified	Mouradov et al., 2014
HT55	chr1	64836205	C	G	0	273	1	Missense mutation	MSS	JAK1	NM_002227:exon23:c.G3151C:p.E1051Q	NA	NA	NA	NA	-	Unknown	unclassified	Mouradov et al., 2014
HT55	chr17	31163376	G	T	1	256	0.996109	Missense mutation	MSS	NF1	NM_001042492:exon4:c.G479T:p.R160M	probably damaging	0.963	deleterious - low confidence	0	-	Unknown	unclassified	Mouradov et al., 2014
HT55	chr17	7674892	TC	CA	0	525	1	Missense mutation	MSS	TP53	NM_000546:exon6:c.638_639TG	NA	NA	NA	NA	-	Unknown	not reported	Ghandi et al., 2019;Liu and Bodmer, 2006
Isreco-1	chr5	112837714	T	C	331	348	0.512518	Missense mutation	MSS	APC	NM_000038:exon16:c.T2120C:p.L707P	NA	NA	NA	NA	-	Unknown	not reported	Berg et al., 2017
Isreco-1	chr5	112838643	A	-	303	287	0.486441	Frameshift deletion	MSS	APC	NM_000038:exon16:c.3049delA:p.N1017fs	NA	NA	NA	NA	-	P	not reported	Berg et al., 2017
Isreco-1	chr5	112839942	C	T	344	318	0.480363	Nonsense mutation	MSS	APC	NM_000038:exon16:c.C4348T:p.R1450*	NA	NA	NA	NA	VCV000194585.21	P	not reported	Berg et al., 2017
Isreco-1	chr12	25245350	C	T	1	1232	0.999189	Missense mutation	MSS	KRAS	NM_004985:exon2:c.G35A:p.G12D	NA	NA	deleterious - low confidence	0.04	VCV000012582.33	P	DRV	Berg et al., 2017; Ahmed et al., 2013
Isreco-1	chr17	31340598	G	C	250	215	0.462366	Missense mutation	MSS	NF1	NM_001042492:exon47:c.G7015C:p.E2339Q	NA	NA	NA	NA	-	Unknown	not reported	Berg et al., 2017
Isreco-1	chr18	47845378	-	G	214	279	0.565923	Frameshift insertion	MSS	SMAD2	NM_005901:exon10:c.1241_1242insC:p.I414fs	NA	NA	NA	NA	-	P	not reported	Unreported
Isreco-1	chr18	47869405	G	A	196	226	0.535545	Nonsense mutation	MSS	SMAD2	NM_005901:exon4:c.C358T:p.R120*	NA	NA	NA	NA	VCV002507171.3	LP	not reported	Unreported
Isreco-1	chr17	7675125	A	G	0	682	1	Missense mutation	MSS	TP53	NM_000546:exon5:c.T487C:p.Y163H	NA	NA	deleterious	0	VCV000376680.16	LP	not reported	Berg et al., 2017;Ahmed et al., 2013
Isreco-3	chr5	112837714	T	C	420	477	0.531773	Missense mutation	MSS	APC	NM_000038:exon16:c.T2120C:p.L707P	NA	NA	NA	NA	-	Unknown	not reported	Berg et al., 2017
Isreco-3	chr5	112838643	A	-	378	370	0.494652	Frameshift deletion	MSS	APC	NM_000038:exon16:c.3049delA:p.N1017fs	NA	NA	NA	NA	-	P	not reported	Berg et al., 2017
Isreco-3	chr5	112839942	C	T	441	458	0.509455	Nonsense mutation	MSS	APC	NM_000038:exon16:c.C4348T:p.R1450*	NA	NA	NA	NA	VCV000194585.21	P	not reported	Berg et al., 2017
Isreco-3	chr12	25245350	C	T	194	370	0.656028	Missense mutation	MSS	KRAS	NM_004985:exon2:c.G35A:p.G12D	NA	NA	deleterious - low confidence	0.04	VCV000012582.33	P	DRV	Berg et al., 2017; Ahmed et al., 2013
Isreco-3	chr18	47869405	G	A	0	308	1	Nonsense mutation	MSS	SMAD2	NM_005901:exon4:c.C358T:p.R120*	NA	NA	NA	NA	VCV002507171.3	LP	not reported
Isreco-3	chr17	7675125	A	G	0	519	1	Missense mutation	MSS	TP53	NM_000546:exon5:c.T487C:p.Y163H	NA	NA	deleterious	0	VCV000376680.16	LP	not reported	Berg et al., 2017;Ahmed et al., 2013
JVE017	chr7	140753336	A	T	488	404	0.452915	Missense mutation	MSS	BRAF	NM_004333:exon15:c.T1799A:p.V600E	probably damaging	0.935	deleterious - low confidence	0	VCV000013961.129	P	DRV	Boot 2017
JVE017	chr17	7673772	C	G	0	691	1	Missense mutation	MSS	TP53	NM_000546:exon8:c.G848C:p.R283P	NA	NA	deleterious	0	VCV000486555.8	LP	not reported	Mouradov et al., 2014
JVE114	chr5	112839515	AAAAG	-	0	552	1	Frameshift deletion	MSS	APC	NM_000038:exon16:c.3921_3925del:p.I1307fs	NA	NA	NA	NA	VCV000216016.11	LP	not reported	Boot et al., 2016
JVE114	chr4	152337912	-	C	313	143	0.313596	Frameshift insertion	MSS	FBXW7	NM_033632:exon5:c.750dupG:p.L251fs	NA	NA	NA	NA	-	P	not reported	Unreported
JVE114	chr17	7674893	C	A	1	648	0.998459	Missense mutation	MSS	TP53	NM_000546:exon6:c.G638T:p.R213L	NA	NA	deleterious	0	VCV000376650.9	LP	not reported	Boot et al., 2016
JVE127	chr1	26773690	-	GCA	0	215	0.9416	Inframe insertion	MSS	ARID1A	NM_006015:exon16:c.3977_3978insGCA:p.P1326delinsPQ	NA	NA	NA	NA	VCV000235338.19	Likely benign	not reported	Unreported
JVE127	chr7	140753336	A	T	208	327	0.611215	Missense mutation	MSS	BRAF	NM_004333:exon15:c.T1799A:p.V600E	probably damaging	0.935	deleterious - low confidence	0	VCV000013961.129	P	DRV	Boot et al., 2016
JVE127	chr18	51078264	GCTGCTGCTGGAATTGGTGTT	-	0	416	1	Inframe deletion	MSS	SMAD4	NM_005359:exon12:c.1456_1476del:p.486_492del	NA	NA	NA	NA	-	Unknown	not reported	Unreported
JVE127	chr17	7675218	T	G	32	516	1	Missense mutation	MSS	TP53	NM_000546:exon5:c.A394C:p.K132Q	NA	NA	deleterious	0	VCV000376628.11	LP	not reported	Boot et al., 2016
KM12	chr5	112827111	G	A	260	196	0.429825	Missense mutation	MSI	APC	NM_000038:exon12:c.G1412A:p.G471E	probably damaging	0.915	deleterious - low confidence	0	VCV000855457.11	Uncertain Significance	unclassified	Berg et al., 2017; Mouradov et al., 2014
KM12	chr5	112841042	-	A	301	319	0.514516	Frameshift insertion	MSI	APC	NM_000038:exon16:c.5449dupA:p.L1816fs	NA	NA	NA	NA	-	P	not reported	Berg et al., 2017
KM12	chr1	26731484	G	C	510	488	0.488978	Missense mutation	MSI	ARID1A	NM_006015:exon3:c.G1683C:p.Q561H	NA	NA	NA	NA	-	Unknown	unclassified	Mouradov et al., 2014
KM12	chr1	26779439	-	G	408	449	0.523921	Frameshift insertion	MSI	ARID1A	NM_006015:exon20:c.5542dupG:p.G1847fs	NA	NA	NA	NA	-	P	not reported	Unreported
KM12	chr7	140734764	C	T	166	144	0.464516	Missense mutation	MSI	BRAF	NM_004333:exon18:c.G2134A:p.A712T	benign	0.042	deleterious - low confidence	0	VCV000802373.4	Likely benign	unclassified	Unreported
KM12	chr7	140783126	-	G	387	335	0.463989	Frameshift insertion	MSI	BRAF	NM_004333:exon10:c.1208dupC:p.P403fs	NA	NA	NA	NA	-	Unknown	unclassified	Berg et al., 2017
KM12	chr7	55163818	G	T	317	331	0.510802	Nonsense mutation	MSI	EGFR	NM_005228:exon14:c.G1717T:p.G573*	NA	NA	NA	NA	-	Unknown	unclassified	Berg et al., 2017; Mouradov et al., 2014
KM12	chr17	39710131	C	T	602	444	0.424474	Missense mutation	MSI	ERBB2	NM_004448:exon6:c.C689T:p.P230L	NA	NA	NA	NA	-	Unknown	unclassified	Berg et al., 2017; Mouradov et al., 2014
KM12	chr17	31229448	T	C	252	229	0.476091	Missense mutation	MSI	NF1	NM_001042492:exon21:c.T2833C:p.F945L	NA	NA	NA	NA	-	Unknown	unclassified	Berg et al., 2017
KM12	chr17	31249091	T	G	316	310	0.495208	Missense mutation	MSI	NF1	NM_001042492:exon30:c.T4082G:p.L1361R	NA	NA	NA	NA	VCV002736549.1	Uncertain Significance	unclassified	Berg et al., 2017; Mouradov et al., 2014
KM12	chr10	87933144	G	T	334	277	0.453355	Nonsense mutation	MSI	PTEN	NM_000314:exon5:c.G385T:p.G129*	NA	NA	NA	NA	-	P	DRV	Berg et al., 2017; Mouradov et al., 2014
KM12	chr10	87958013	A	-	183	191	0.510695	Frameshift deletion	MSI	PTEN	NM_000314:exon7:c.795delA:p.L265fs	NA	NA	NA	NA	-	P	DRV	Berg et al., 2017
KM12	chr17	7675076	T	C	430	419	0.493522	Missense mutation	MSI	TP53	NM_000546:exon5:c.A536G:p.H179R	NA	NA	deleterious	0	VCV000376606.35	P	DRV	Berg et al., 2017; Mouradov et al., 2014; Ghandi et al., 2019
KM12	chr17	7676153	G	-	485	445	0.478495	Frameshift deletion	MSI	TP53	NM_000546:exon4:c.216delC:p.P72fs	NA	NA	NA	NA	-	P	DRV	Berg et al., 2017; Ghandi et al., 2019
KP363T	chr7	140753336	A	T	390	398	0.505076	Missense mutation	MSS	BRAF	NM_004333:exon15:c.T1799A:p.V600E	probably damaging	0.935	deleterious - low confidence	0	VCV000013961.129	P	DRV	Boot et al., 2016
KP363T	chr3	179218303	G	A	351	601	0.631303	Missense mutation	MSS	PIK3CA	NM_006218:exon10:c.G1633A:p.E545K	probably damaging	0.912	deleterious	0	VCV000013655.45	P	DRV	Boot et al., 2016
KP363T	chr17	7673704	G	A	0	672	1	Nonsense mutation	MSS	TP53	NM_000546:exon8:c.C916T:p.R306*	NA	NA	NA	NA	VCV000142144.99	P	not reported	Boot et al., 2016
LIM1863	chr5	112840058	A	-	0	530	1	Frameshift deletion	MSS	APC	NM_000038:exon16:c.4464delA:p.L1488fs	NA	NA	NA	NA	-	P	DRV	Unreported
LIM1863	chr4	152328233	G	A	198	103	0.342193	Missense mutation	MSS	FBXW7	NM_033632:exon9:c.C1393T:p.R465C	probably damaging	1	deleterious - low confidence	0	VCV000376414.11	P	DRV	Unreported
LIM1863	chr17	7674263	A	G	0	520	1	Missense mutation	MSS	TP53	NM_000546:exon7:c.T700C:p.Y234H	NA	NA	deleterious	0	VCV000376691.17	LP	not reported	Liu and Bodmer, 2006
LIM2099	chr3	41224643	CTT	-	0	533	1	Inframe deletion	MSS	CTNNB1	NM_001904:exon3:c.131_133del:p.44_45del	NA	NA	NA	NA	-	P	DRV	Unreported
LIM2099	chr12	25245351	C	A	0	711	1	Missense mutation	MSS	KRAS	NM_004985:exon2:c.G34T:p.G12C	NA	NA	deleterious - low confidence	0	VCV001701193.12	P	DRV	Mouradov et al., 2014; Medico et al., 2015
LIM2405	chr5	112837684	C	T	348	299	0.462133	Missense mutation	MSI	APC	NM_000038:exon16:c.C2090T:p.A697V	benign	0.227	deleterious - low confidence	0.02	VCV000216153.32	Conflicting	not reported	Mouradov et al., 2014
LIM2405	chr5	112842167	A	-	320	290	0.47541	Frameshift deletion	MSI	APC	NM_000038:exon16:c.6573delA:p.G2191fs	NA	NA	NA	NA	-	P	not reported	Unreported
LIM2405	chr1	26697225	G	-	175	162	0.480712	Frameshift deletion	MSI	ARID1A	NM_006015:exon1:c.822delG:p.M274fs	NA	NA	NA	NA	-	P	not reported	Unreported
LIM2405	chr1	26774777	C	-	353	291	0.451863	Frameshift deletion	MSI	ARID1A	NM_006015:exon18:c.4550delC:p.A1517fs	NA	NA	NA	NA	-	P	not reported	Unreported
LIM2405	chr7	140753336	A	T	255	514	0.668401	Missense mutation	MSI	BRAF	NM_004333:exon15:c.T1799A:p.V600E	probably damaging	0.935	deleterious - low confidence	0	VCV000013961.129	P	DRV	Mouradov et al., 2014; Medico et al., 2015
LIM2405	chr3	41235842	A	G	274	92	0.251366	Missense mutation	MSI	CTNNB1	NM_001904:exon11:c.A1802G:p.Q601R	NA	NA	NA	NA	-	Unknown	not reported	Unreported
LIM2405	chr12	68839310	C	-	444	126	0.221053	Frameshift deletion	MSI	MDM2	NM_002392:exon11:c.955delC:p.P319fs	NA	NA	NA	NA	-	Unknown	not reported	Unreported
LIM2405	chr10	87960954	-	A	1	503	0.998016	Frameshift insertion	MSI	PTEN	NM_000314:exon8:c.863dupA:p.E288fs	NA	NA	NA	NA	-	P	not reported	Unreported
LIM2405	chr18	51048846	T	C	336	98	0.225806	Missense mutation	MSI	SMAD4	NM_005359:exon3:c.T410C:p.V137A	NA	NA	NA	NA	-	Unknown	not reported	Unreported
LoVo	chr5	112838934	C	T	364	380	0.510753	Nonsense mutation	MSI	APC	NM_000038:exon16:c.C3340T:p.R1114*	NA	NA	NA	NA	VCV000236589.38	P	DRV	Berg et al., 2017
LoVo	chr5	112839883	C	-	356	333	0.483309	Frameshift deletion	MSI	APC	NM_000038:exon16:c.4289delC:p.T1430fs	NA	NA	NA	NA	-	P	DRV	Berg et al., 2017
LoVo	chr5	112844041	G	A	360	375	0.510204	Missense mutation	MSI	APC	NM_000038:exon16:c.G8447A:p.R2816Q	probably damaging	0.939	deleterious - low confidence	0.01	VCV000419681.17	Conflicting	unclassified	Berg et al., 2017; Mouradov et al., 2014
LoVo	chr1	26729780	G	A	484	447	0.480129	Missense mutation	MSI	ARID1A	NM_006015:exon2:c.G1267A:p.G423R	NA	NA	NA	NA	-	Unknown	not reported	Unreported
LoVo	chr1	26780313	C	-	366	384	0.512	Frameshift deletion	MSI	ARID1A	NM_006015:exon20:c.6415delC:p.P2139fs	NA	NA	NA	NA	-	P	DRV	b
LoVo	chr4	152326137	G	A	303	299	0.496678	Missense mutation	MSI	FBXW7	NM_033632:exon10:c.C1513T:p.R505C	probably damaging	1	deleterious - low confidence	0	VCV000376423.1	P	DRV	Berg et al., 2017
LoVo	chr12	25245344	A	G	285	296	0.509466	Missense mutation	MSI	KRAS	NM_004985:exon2:c.T41C:p.V14A	NA	NA	NA	NA	-	P	not reported	Berg et al., 2017; Ahmed et al., 2013
LoVo	chr12	25245347	C	T	286	296	0.508591	Missense mutation	MSI	KRAS	NM_004985:exon2:c.G38A:p.G13D	NA	NA	deleterious - low confidence	0.04	VCV000012580.49	P	DRV	Berg et al., 2017; Mouradov et al., 2014; Medico et al., 2015; Ahmed et al., 2013
LoVo	chr17	31326068	G	A	379	352	0.481532	Missense mutation	MSI	NF1	NM_001042492:exon37:c.G5084A:p.R1695Q	NA	NA	NA	NA	VCV000481891.9	Uncertain Significance	unclassified	Berg et al., 2017; Mouradov et al., 2014
LoVo	chr18	47848597	G	A	354	364	0.506964	Missense mutation	MSI	SMAD2	NM_005901:exon8:c.C875T:p.A292V	NA	NA	NA	NA	-	Unknown	unclassified	Mouradov et al., 2014
LS1034	chr5	112839515	AAAAG	-	0	847	1	Frameshift deletion	MSS	APC	NM_000038:exon16:c.3921_3925del:p.I1307fs	NA	NA	NA	NA	VCV000216016.11	P	DRV	Berg et al., 2017
LS1034	chr12	25225628	C	T	0	749	1	Missense mutation	MSS	KRAS	NM_004985:exon4:c.G436A:p.A146T	NA	NA	deleterious - low confidence	0	VCV000197243.23	P	DRV	Berg et al., 2017; Medico et al., 2015; Janakiraman 2010
LS1034	chr17	7674230	C	T	0	451	1	Missense mutation	MSS	TP53	NM_000546:exon7:c.G733A:p.G245S	NA	NA	deleterious	0.01	VCV000012365.55	P	DRV/CPV	Berg et al., 2017;Ahmed et al., 2013;Ghandi et al., 2019
LS123	chr5	112819325	G	A	181	157	0.464497	Missense mutation	MSS	APC	NM_000038:exon10:c.G1293A:p.M431I	benign	0	tolerated - low confidence	0.06	VCV001046496.8	Uncertain Significance	unclassified	b
LS123	chr5	112835080	C	T	300	232	0.43609	Nonsense mutation	MSS	APC	NM_000038:exon15:c.C1873T:p.Q625*	NA	NA	NA	NA	VCV000232045.21	P	DRV	a; b
LS123	chr5	112839942	C	T	276	261	0.486034	Nonsense mutation	MSS	APC	NM_000038:exon16:c.C4348T:p.R1450*	NA	NA	NA	NA	VCV000194585.21	P	DRV	a
LS123	chr12	25245351	C	T	212	409	0.658615	Missense mutation	MSS	KRAS	NM_004985:exon2:c.G34A:p.G12S	NA	NA	deleterious - low confidence	0.01	VCV000012584.36	P	DRV	Medico et al., 2015
LS123	chr18	51065455	G	T	0	167	1	Nonsense mutation	MSS	SMAD4	NM_005359:exon9:c.G988T:p.E330*	NA	NA	NA	NA	-	P	DRV	b
LS123	chr17	7675088	C	T	0	559	1	Missense mutation	MSS	TP53	NM_000546:exon5:c.G524A:p.R175H	NA	NA	tolerated	0.08	VCV000012374.66	P	DRV	Ghandi et al., 2019; Liu and Bodmer, 2006
LS174T	chr1	26771197	A	-	368	361	0.495199	Frameshift deletion	MSI	ARID1A	NM_006015:exon12:c.3277delA:p.K1093fs	NA	NA	NA	NA	-	P	DRV	b
LS174T	chr7	140808039	T	C	276	516	0.651515	Missense mutation	MSI	BRAF	NM_004333:exon5:c.A632G:p.D211G	NA	NA	NA	NA	-	Unknown	unclassified	Berg et al., 2017;Mouradov et al., 2014
LS174T	chr3	41224646	C	T	0	572	1	Missense mutation	MSI	CTNNB1	NM_001904:exon3:c.C134T:p.S45F	probably damaging	0.931	deleterious - low confidence	0	VCV000017588.2	LP	not reported	Berg et al., 2017; Mouradov et al., 2014; Rowan et al., 2000
LS174T	chr4	152328209	T	-	327	27	0.0762712	Frameshift deletion	MSI	FBXW7	NM_033632:exon9:c.1417delA:p.R473fs	NA	NA	NA	NA	-	P	not reported	Unreported
LS174T	chr1	64845587	G	A	359	346	0.49078	Missense mutation	MSI	JAK1	NM_002227:exon15:c.C2041T:p.R681W	probably damaging	0.976	deleterious	0	VCV002748826.1	Uncertain Significance	unclassified	Berg et al., 2017; Mouradov et al., 2014
LS174T	chr12	25245350	C	T	308	250	0.448029	Missense mutation	MSI	KRAS	NM_004985:exon2:c.G35A:p.G12D	NA	NA	deleterious - low confidence	0.04	VCV000012582.33	P	DRV	Berg et al., 2017; Mouradov et al., 2014; Ahmed et al., 2013; Gayet et al., 2001
LS174T	chr3	179234297	A	G	261	281	0.51845	Missense mutation	MSI	PIK3CA	NM_006218:exon21:c.A3140G:p.H1047R	benign	0.088	deleterious	0	VCV000013652.76	P	DRV	Berg et al., 2017; Mouradov et al., 2014; Medico et al., 2015; Ahmed et al., 2013
LS513	chr7	140808060	TC	AA	445	230	0.340741	Missense mutation	MSS	BRAF	NM_004333:exon5:c.610_611TT	NA	NA	NA	NA	-	Unknown	unclassified	Medico et al., 2015
LS513	chr12	25245350	C	T	281	294	0.511304	Missense mutation	MSS	KRAS	NM_004985:exon2:c.G35A:p.G12D	NA	NA	deleterious - low confidence	0.04	VCV000012582.33	P	DRV	Mouradov et al., 2014; Medico et al., 2015
MDST8	chr5	112840254	-	A	1	407	0.997549	Frameshift insertion	MSS	APC	NM_000038:exon16:c.4661dupA:p.E1554fs	NA	NA	NA	NA	-	P	DRV	a
MDST8	chr7	140753336	AC	TT	151	645	0.810302	Missense mutation	MSS	BRAF	NM_004333:exon15:c.1798_1799AA:p.V600K	possibly damaging	0.802	deleterious - low confidence	0	VCV000375941.6	P	not reported	Unreported
MDST8	chr10	87961021	A	G	0	568	1	Missense mutation	MSS	PTEN	NM_000314:exon8:c.A929G:p.D310G	benign	0	tolerated	0.22	VCV000566673.16	LP	unclassified	Smeby et al., 2020
NCI-H508	chr7	140753349	C	G	491	208	0.297568	Missense mutation	MSS	BRAF	NM_004333:exon15:c.G1786C:p.G596R	probably damaging	1	deleterious - low confidence	0	-	P	DRV	Berg et al., 2017;Ahmed et al., 2013
NCI-H508	chr3	179218303	G	A	489	357	0.421986	Missense mutation	MSS	PIK3CA	NM_006218:exon10:c.G1633A:p.E545K	probably damaging	0.912	deleterious	0	VCV000013655.45	P	DRV	Berg et al., 2017; Medico et al., 2015; Ahmed et al., 2013
NCI-H508	chr17	7673802	C	T	0	504	1	Missense mutation	MSS	TP53	NM_000546:exon8:c.G818A:p.R273H	NA	NA	tolerated	0.07	VCV000012366.60	P	DRV	Berg et al., 2017; Ahmed et al., 2013; Ghandi et al., 2019
NCI-H716	chr12	25227234	C	A	172	71	0.292181	Missense mutation	MSS	KRAS	NM_004985:exon3:c.G290T:p.R97I	NA	NA	deleterious - low confidence	0	-	Unknown	not reported	Mouradov et al., 2014
NCI-H716	chr17	7674859	C	A	0	353	1	Missense mutation	MSS	TP53	NM_000546:exon6:c.G672T:p.E224D	NA	NA	deleterious	0.01	VCV001493447.6	P	DRV	Liu and Bodmer, 2006
NCI-H747	chr5	112775687	C	T	229	209	0.477169	Nonsense mutation	MSS	APC	NM_000038:exon5:c.C481T:p.Q161*	NA	NA	NA	NA	VCV000229997.19	P	DRV	Mouradov et al., 2014
NCI-H747	chr5	112839879	C	T	284	277	0.493761	Nonsense mutation	MSS	APC	NM_000038:exon16:c.C4285T:p.Q1429*	NA	NA	NA	NA	VCV000376063.4	P	DRV	Mouradov et al., 2014
NCI-H747	chr7	55154107	G	A	1090	170	0.134921	Missense mutation	MSS	EGFR	NM_005228:exon7:c.G844A:p.E282K	benign	0.014	tolerated - low confidence	0.14	VCV001050096.10	Likely benign	unclassified	B
NCI-H747	chr12	25245347	C	T	160	286	0.641256	Missense mutation	MSS	KRAS	NM_004985:exon2:c.G38A:p.G13D	NA	NA	deleterious - low confidence	0.04	VCV000012580.49	P	DRV	Mouradov et al., 2014; Medico et al., 2015
NCI-H747	chr17	7675139	C	A	0	450	1	Missense mutation	MSS	TP53	NM_000546:exon5:c.G473T:p.R158L	NA	NA	deleterious	0	VCV000528248.32	P	DRV/CPV	Mouradov et al., 2014
OUMS-23	chr5	112837563	AG	-	196	106	0.350993	Frameshift deletion	MSS	APC	NM_000038:exon16:c.1969_1970del:p.R657fs	NA	NA	NA	NA	-	P	not reported	a
OUMS-23	chr5	112840254	-	A	183	339	0.649425	Frameshift insertion	MSS	APC	NM_000038:exon16:c.4661dupA:p.E1554fs	NA	NA	NA	NA	-	P	not reported	a
OUMS-23	chr7	140753336	A	T	353	149	0.296813	Missense mutation	MSS	BRAF	NM_004333:exon15:c.T1799A:p.V600E	probably damaging	0.935	deleterious - low confidence	0	VCV000013961.129	P	DRV	a
OUMS-23	chr17	7674262	T	C	0	445	1	Missense mutation	MSS	TP53	NM_000546:exon7:c.A701G:p.Y234C	NA	NA	deleterious	0	VCV000127820.26	LP	not reported	Ghandi et al., 2019
RCM-1	chr5	112792446	C	T	163	64	0.281938	Nonsense mutation	MSS	APC	NM_000038:exon7:c.C646T:p.R216*	NA	NA	NA	NA	VCV000127312.30	P	DRV	a; b
RCM-1	chr4	152326137	G	A	124	105	0.458515	Missense mutation	MSS	FBXW7	NM_033632:exon10:c.C1513T:p.R505C	probably damaging	1	deleterious - low confidence	0	-	P	DRV	Unreported
RCM-1	chr12	25245350	C	A	1	357	0.997207	Missense mutation	MSS	KRAS	NM_004985:exon2:c.G35T:p.G12V	NA	NA	deleterious - low confidence	0.01	VCV000012583.50	P	DRV	Medico et al., 2015
RCM-1	chr18	51065549	G	A	0	236	1	Missense mutation	MSS	SMAD4	NM_005359:exon9:c.G1082A:p.R361H	probably damaging	1	deleterious - low confidence	0	VCV000024832.19	P	DRV	b
RCM-1	chr17	7673704	G	A	0	369	1	Nonsense mutation	MSS	TP53	NM_000546:exon8:c.C916T:p.R306*	NA	NA	NA	NA	VCV000142144.99	P	DRV	Ghandi et al., 2019; Liu and Bodmer, 2006
RKO	chr5	112766327	A	G	245	17	0.0648855	Missense mutation	MSI	APC	NM_000038:exon3:c.A137G:p.E46G	probably damaging	0.977	deleterious - low confidence	0	VCV000246492.2	Uncertain Significance	not reported	Unreported
RKO	chr1	26771260	C	-	234	225	0.490196	Frameshift deletion	MSI	ARID1A	NM_006015:exon12:c.3340delC:p.P1114fs	NA	NA	NA	NA	-	P	DRV	b
RKO	chr1	26779440	G	-	241	214	0.47033	Frameshift deletion	MSI	ARID1A	NM_006015:exon20:c.5542delG:p.G1848fs	NA	NA	NA	NA	-	P	DRV	b
RKO	chr7	140753336	A	T	181	378	0.676208	Missense mutation	MSI	BRAF	NM_004333:exon15:c.T1799A:p.V600E	probably damaging	0.935	deleterious - low confidence	0	VCV000013961.129	P	DRV	Berg et al., 2017;Mouradov et al., 2014;Medico et al., 2015;Ahmed et al., 2013
RKO	chr17	39724805	T	C	504	32	0.0597015	Missense mutation	MSI	ERBB2	NM_004448:exon20:c.T2387C:p.L796P	NA	NA	NA	NA	-	Unknown	unclassified	b
RKO	chr8	127740600	C	T	697	211	0.232379	Missense mutation	MSI	MYC	NM_002467:exon3:c.C1007T:p.A336V	NA	NA	NA	NA	-	Unknown	unclassified	Berg et al., 2017
RKO	chr17	31225126	T	-	173	190	0.523416	Frameshift deletion	MSI	NF1	NM_001042492:exon17:c.1877delT:p.L626fs	NA	NA	NA	NA	VCV000820244.6	LP	not reported	Berg et al., 2017
RKO	chr17	31252977	-	A	294	37	0.111782	Frameshift insertion	MSI	NF1	NM_001042492:exon31:c.4151dupA:p.E1384fs	NA	NA	NA	NA	-	P	not reported	Unreported
RKO	chr17	31337554	T	C	223	47	0.174074	Missense mutation	MSI	NF1	NM_001042492:exon43:c.T6614C:p.V2205A	NA	NA	NA	NA	-	Unknown	unclassified	b
RKO	chr17	31340602	A	-	178	172	0.491429	Frameshift deletion	MSI	NF1	NM_001042492:exon47:c.7019delA:p.Q2340fs	NA	NA	NA	NA	-	P	DRV	Berg et al., 2017
RKO	chr3	179234297	A	G	174	168	0.491228	Missense mutation	MSI	PIK3CA	NM_006218:exon21:c.A3140G:p.H1047R	benign	0.088	deleterious	0	VCV000013652.76	P	DRV	Berg et al., 2017;Mouradov et al., 2014;Medico et al., 2015;Ahmed et al., 2013
SK-CO-1	chr5	112838859	T	-	193	379	0.662587	Frameshift deletion	MSS	APC	NM_000038:exon16:c.3265delT:p.F1089fs	NA	NA	NA	NA	-	P	DRV	Mouradov et al., 2014
SK-CO-1	chr5	112839921	C	-	336	148	0.305785	Frameshift deletion	MSS	APC	NM_000038:exon16:c.4327delC:p.P1443fs	NA	NA	NA	NA	-	P	DRV	Mouradov et al., 2014
SK-CO-1	chr12	25245350	C	A	264	921	0.777215	Missense mutation	MSS	KRAS	NM_004985:exon2:c.G35T:p.G12V	NA	NA	deleterious - low confidence	0.01	VCV000012583.50	P	DRV	Mouradov et al., 2014; Medico et al., 2015
SNU-1033	chr5	112838682	A	T	0	395	1	Nonsense mutation	MSS	APC	NM_000038:exon16:c.A3088T:p.K1030*	NA	NA	NA	NA	-	P	DRV	b
SNU-1033	chr12	25245350	C	T	160	308	0.65812	Missense mutation	MSS	KRAS	NM_004985:exon2:c.G35A:p.G12D	NA	NA	deleterious - low confidence	0.04	VCV000012582.33	P	DRV	Ku and Park, 2005; Oh et al., 1999
SNU-1033	chr17	7674962	G	A	0	517	1	Missense mutation	MSS	TP53	NM_000546:exon6:c.C569T:p.P190L	NA	NA	deleterious	0	VCV000418517.19	P	DRV	Ghandi et al., 2019
SNU-1181	chr5	112839702	A	T	0	549	1	Nonsense mutation	MSS	APC	NM_000038:exon16:c.A4108T:p.K1370*	NA	NA	NA	NA	-	P	not reported	Ku et al., 2010
SNU-1181	chr12	25245351	C	T	283	363	0.56192	Missense mutation	MSS	KRAS	NM_004985:exon2:c.G34A:p.G12S	NA	NA	deleterious - low confidence	0.01	VCV000012584.36	P	DRV	Medico et al., 2015
SNU-1181	chr17	7673776	G	A	0	465	1	Missense mutation	MSS	TP53	NM_000546:exon8:c.C844T:p.R282W	NA	NA	deleterious	0	VCV000012364.68	LP	not reported	Ku et al., 2010
SNU-1197	chr5	112792494	C	T	362	200	0.355872	Nonsense mutation	MSS	APC	NM_000038:exon7:c.C694T:p.R232*	NA	NA	NA	NA	-	P	DRV	a
SNU-1197	chr5	112839515	AAAAG	-	265	482	0.645248	Frameshift deletion	MSS	APC	NM_000038:exon16:c.3921_3925del:p.I1307fs	NA	NA	NA	NA	VCV000216016.11	P	DRV	Unreported
SNU-1197	chr4	152326214	C	T	0	543	1	Missense mutation	MSS	FBXW7	NM_033632:exon10:c.G1436A:p.R479Q	probably damaging	1	deleterious - low confidence	0	VCV000376419.1	P	DRV	a; b
SNU-1197	chr12	25245350	C	T	0	567	1	Missense mutation	MSS	KRAS	NM_004985:exon2:c.G35A:p.G12D	NA	NA	deleterious - low confidence	0.04	VCV000012582.33	P	DRV	Ku and Park, 2005; Oh et al., 1999
SNU-1197	chr17	7675088	C	T	0	446	1	Missense mutation	MSS	TP53	NM_000546:exon5:c.G524A:p.R175H	NA	NA	tolerated	0.08	VCV000012374.66	P	DRV	Ku and Park, 2005; Oh et al., 1999
SNU-1235	chr5	7673776	G	-	259	237	0.477823	Frameshift deletion	MSS	APC	NM_000038:exon16:c.2556delG:p.L852fs	NA	NA	NA	NA	-	P	not reported	Unreported
SNU-1235	chr5	112840254	-	A	202	206	0.504902	Frameshift insertion	MSS	APC	NM_000038:exon16:c.4661dupA:p.E1554fs	NA	NA	NA	NA	-	P	not reported	Ku et al., 2010
SNU-1235	chr1	26774906	C	A	145	93	0.390756	Missense mutation	MSS	ARID1A	NM_006015:exon18:c.C4679A:p.P1560H	NA	NA	NA	NA	-	Unknown	not reported	Unreported
SNU-1235	chr7	140753336	A	T	137	372	0.730845	Missense mutation	MSS	BRAF	NM_004333:exon15:c.T1799A:p.V600E	probably damaging	0.935	deleterious - low confidence	0	VCV000013961.129	P	DRV	Mouradov et al., 2014;Medico et al., 2015
SNU-1235	chr10	87933147	C	T	0	397	1	Nonsense mutation	MSS	PTEN	NM_000314:exon5:c.C388T:p.R130*	NA	NA	NA	NA	VCV000007819.94	P	not reported	Unreported
SNU-1235	chr18	51078292	T	C	0	328	1	Missense mutation	MSS	SMAD4	NM_005359:exon12:c.T1484C:p.L495P	NA	NA	NA	NA	-	Unknown	not reported	Unreported
SNU-1235	chr17	7674894	G	A	0	513	1	Nonsense mutation	MSS	TP53	NM_000546:exon6:c.C637T:p.R213*	NA	NA	NA	NA	VCV000043590.47	P	DRV	Ku et al., 2010
SNU-1411	chr7	140753332	T	A	247	304	0.551724	Missense mutation	MSS	BRAF	NM_004333:exon15:c.A1803T:p.K601N	possibly damaging	0.866	deleterious - low confidence	0	VCV000376285.1	LP	not reported	Unreported
SNU-1411	chr12	25245351	C	A	1	1290	0.999225	Missense mutation	MSS	KRAS	NM_004985:exon2:c.G34T:p.G12C	NA	NA	deleterious - low confidence	0	VCV001701193.12	P	DRV	Mouradov et al., 2014; Medico et al., 2015
SNU-1411	chr17	7676088	G	T	1	654	0.998473	Nonsense mutation	MSS	TP53	NM_000546:exon4:c.C281A:p.S94*	NA	NA	NA	NA	-	P	not reported	Ku et al., 2010
SNU-1460	chr3	41236597	C	A	189	364	0.658228	Missense mutation	MSS	CTNNB1	NM_001904:exon13:c.C1964A:p.A655E	probably damaging	0.999	deleterious - low confidence	0	VCV001035945.1	Uncertain Significance	not reported	Unreported
SNU-1460	chr7	55201763	C	T	450	347	0.435383	Missense mutation	MSS	EGFR	NM_005228:exon26:c.C3143T:p.A1048V	benign	0.001	tolerated - low confidence	0.43	VCV000730373.10	Conflicting	not reported	Unreported
SNU-1460	chr17	7675052	C	T	0	341	1	.	MSS	TP53	Splicing	NA	NA	NA	NA	-	Unknown	not reported	Unreported
SNU-1746	chr5	112815573	A	G	222	214	0.490826	Missense mutation	MSI	APC	NM_000038:exon9:c.A913G:p.T305A	benign	0.045	tolerated - low confidence	0.05	VCV000641402.10	Uncertain Significance	not reported	Unreported
SNU-1746	chr5	112828906	-	A	188	186	0.497326	Frameshift insertion	MSI	APC	NM_000038:exon14:c.1678dupA:p.S559fs	NA	NA	NA	NA	-	P	not reported	Ku et al., 2010
SNU-1746	chr5	112839879	C	T	284	283	0.499118	Nonsense mutation	MSI	APC	NM_000038:exon16:c.C4285T:p.Q1429*	NA	NA	NA	NA	VCV000376063.4	P	not reported	Ku et al., 2010
SNU-1746	chr5	112840254	-	A	244	227	0.481953	Frameshift insertion	MSI	APC	NM_000038:exon16:c.4661dupA:p.E1554fs	NA	NA	NA	NA	-	P	not reported	Ku et al., 2010
SNU-1746	chr1	26779440	G	-	287	268	0.482883	Frameshift deletion	MSI	ARID1A	NM_006015:exon20:c.5542delG:p.G1848fs	NA	NA	NA	NA	-	P	DRV	Unreported
SNU-1746	chr7	140753354	T	C	384	46	0.106977	Missense mutation	MSI	BRAF	NM_004333:exon15:c.A1781G:p.D594G	probably damaging	0.996	deleterious - low confidence	0	-	P	not reported	Unreported
SNU-1746	chr3	41233683	T	C	561	394	0.412565	Missense mutation	MSI	CTNNB1	NM_001904:exon9:c.T1340C:p.L447P	NA	NA	NA	NA	-	Unknown	not reported	Unreported
SNU-1746	chr12	25225713	T	A	402	73	0.153684	Missense mutation	MSI	KRAS	NM_004985:exon4:c.A351T:p.K117N	NA	NA	deleterious - low confidence	0	-	P	not reported	Unreported
SNU-1746	chr12	25245347	C	T	228	215	0.485327	Missense mutation	MSI	KRAS	NM_004985:exon2:c.G38A:p.G13D	NA	NA	deleterious - low confidence	0.04	VCV000012580.49	P	DRV	Medico et al., 2015
SNU-1746	chr18	51076650	C	T	154	125	0.448029	Missense mutation	MSI	SMAD4	NM_005359:exon11:c.C1321T:p.R441C	probably damaging	0.997	deleterious - low confidence	0	VCV000640252.14	Uncertain Significance	not reported	Unreported
SNU-254	chr5	112815564	C	T	218	243	0.527115	Nonsense mutation	MSS	APC	NM_000038:exon9:c.C904T:p.R302*	NA	NA	NA	NA	VCV000000798.35	LP	not reported	Unreported
SNU-254	chr5	112840055	T	-	342	304	0.470588	Frameshift deletion	MSS	APC	NM_000038:exon16:c.4461delT:p.T1487fs	NA	NA	NA	NA	VCV001342999.2	P	not reported	Ku et al., 2010
SNU-254	chr4	152326016	T	C	0	307	1	Missense mutation	MSS	FBXW7	NM_033632:exon10:c.A1634G:p.Y545C	NA	NA	NA	NA	-	P	not reported	Unreported
SNU-254	chr12	25245350	C	T	216	200	0.480769	Missense mutation	MSS	KRAS	NM_004985:exon2:c.G35A:p.G12D	NA	NA	deleterious - low confidence	0.04	VCV000012582.33	P	DRV	Ku et al., 2010
SNU-254	chr3	179218304	A	C	209	130	0.383481	Missense mutation	MSS	PIK3CA	NM_006218:exon10:c.A1634C:p.E545A	probably damaging	0.935	deleterious	0	VCV000013659.7	P	not reported	Medico et al., 2015
SNU-254	chr17	7673764	C	T	0	356	1	Missense mutation	MSS	TP53	NM_000546:exon8:c.G856A:p.E286K	NA	NA	deleterious	0.01	-	P	not reported	Ku et al., 2010
SNU-61	chr5	112839942	C	T	0	225	1	Nonsense mutation	MSS	APC	NM_000038:exon16:c.C4348T:p.R1450*	NA	NA	NA	NA	VCV000194585.21	P	DRV	Ku and Park, 2005; Oh et al., 1999
SNU-61	chr12	25245350	C	T	195	351	0.642857	Missense mutation	MSS	KRAS	NM_004985:exon2:c.G35A:p.G12D	NA	NA	deleterious - low confidence	0.04	VCV000012582.33	P	DRV	Ku and Park, 2005; Oh et al., 1999
SNU-61	chr17	7675088	C	T	0	494	1	Missense mutation	MSS	TP53	NM_000546:exon5:c.G524A:p.R175H	NA	NA	tolerated	0.08	VCV000012374.66	P	DRV	Oh et al., 1999; Ghandi et al., 2019
SNU-70	chr5	112780841	C	T	254	210	0.452586	Nonsense mutation	MSS	APC	NM_000038:exon6:c.C583T:p.Q195*	NA	NA	NA	NA	VCV000419992.15	P	not reported	Unreported
SNU-70	chr5	112839474	C	T	216	174	0.446154	Nonsense mutation	MSS	APC	NM_000038:exon16:c.C3880T:p.Q1294*	NA	NA	NA	NA	-	P	not reported	Ku et al., 2010
SNU-70	chr12	25245351	C	A	210	177	0.457364	Missense mutation	MSS	KRAS	NM_004985:exon2:c.G34T:p.G12C	NA	NA	deleterious - low confidence	0	VCV001701193.12	P	DRV	Ku et al., 2010
SNU-70	chr17	7673774	C	-	0	346	1	Frameshift deletion	MSS	TP53	NM_000546:exon8:c.846delG:p.R282fs	NA	NA	NA	NA	VCV000428891.5	P	not reported	Ku et al., 2010
SNU-81	chr5	112819111	T	G	256	252	0.496063	Nonsense mutation	MSS-POLE	APC	NM_000038:exon10:c.T1079G:p.L360*	NA	NA	NA	NA	VCV002096986.2	P	DRV	Ku and Park, 2005; Oh et al., 1999
SNU-81	chr5	112839769	C	A	269	270	0.500928	Nonsense mutation	MSS-POLE	APC	NM_000038:exon16:c.C4175A:p.S1392*	NA	NA	NA	NA	VCV000188240.5	P	DRV	a; b
SNU-81	chr5	112839942	C	T	286	263	0.479053	Nonsense mutation	MSS-POLE	APC	NM_000038:exon16:c.C4348T:p.R1450*	NA	NA	NA	NA	VCV000194585.21	P	not reported	a
SNU-81	chr5	112842204	C	T	256	285	0.526802	Nonsense mutation	MSS-POLE	APC	NM_000038:exon16:c.C6610T:p.R2204*	NA	NA	NA	NA	-	P	DRV	a; b
SNU-81	chr1	26780091	G	A	272	270	0.498155	Missense mutation	MSS-POLE	ARID1A	NM_006015:exon20:c.G6193A:p.A2065T	NA	NA	NA	NA		Unknown	unclassified	b
SNU-81	chr3	41227271	G	A	498	237	0.322449	Missense mutation	MSS-POLE	CTNNB1	NM_001904:exon7:c.G1000A:p.E334K	probably damaging	0.968	deleterious - low confidence	0		Unknown	unclassified	Unreported
SNU-81	chr3	41233764	G	A	556	268	0.325243	Missense mutation	MSS-POLE	CTNNB1	NM_001904:exon9:c.G1421A:p.R474Q	NA	NA	NA	NA	-	Unknown	unclassified	b
SNU-81	chr7	55019361	G	T	46	53	0.535354	Missense mutation	MSS-POLE	EGFR	NM_005228:exon1:c.G84T:p.K28N	NA	NA	NA	NA	-	Unknown	unclassified	B
SNU-81	chr4	152324268	C	A	239	242	0.503119	Missense mutation	MSS-POLE	FBXW7	NM_033632:exon11:c.G1771T:p.D591Y	NA	NA	NA	NA		Unknown	unclassified	b
SNU-81	chr4	152326214	C	T	188	198	0.512953	Missense mutation	MSS-POLE	FBXW7	NM_033632:exon10:c.G1436A:p.R479Q	probably damaging	1	deleterious - low confidence	0	VCV000376419.1	P	DRV	a; b
SNU-81	chr4	152411497	C	A	470	128	0.214047	Nonsense mutation	MSS-POLE	FBXW7	NM_033632:exon2:c.G307T:p.E103*	NA	NA	NA	NA	-	P	DRV	b
SNU-81	chr12	25225628	C	T	166	155	0.482866	Missense mutation	MSS-POLE	KRAS	NM_004985:exon4:c.G436A:p.A146T	NA	NA	deleterious - low confidence	0	VCV000197243.23	P	DRV	Medico et al., 2015
SNU-81	chr12	25225772	C	A	225	42	0.157303	Nonsense mutation	MSS-POLE	KRAS	NM_004985:exon4:c.G292T:p.E98*	NA	NA	NA	NA	-	Unknown	not reported	Unreported
SNU-81	chr12	68839584	T	G	256	281	0.523277	Missense mutation	MSS-POLE	MDM2	NM_002392:exon11:c.T1229G:p.I410S	NA	NA	NA	NA	-	Unknown	unclassified	b
SNU-81	chr17	31249093	C	T	191	205	0.517677	Nonsense mutation	MSS-POLE	NF1	NM_001042492:exon30:c.C4084T:p.R1362*	NA	NA	NA	NA	-	P	DRV/CPV	b
SNU-81	chr17	31259031	G	T	150	139	0.480969	.	MSS-POLE	NF1	Splicing	NA	NA	NA	NA	-	P	DRV	Unreported
SNU-81	chr17	31330454	C	T	313	142	0.312088	Missense mutation	MSS-POLE	NF1	NM_001042492:exon39:c.C5768T:p.T1923M	NA	NA	NA	NA	-	Unknown	unclassified	Unreported
SNU-81	chr17	31360589	C	T	260	241	0.481038	Missense mutation	MSS-POLE	NF1	NM_001042492:exon57:c.C8263T:p.L2755F	NA	NA	NA	NA	-	Unknown	unclassified	b
SNU-81	chr1	114709625	C	T	287	247	0.462547	Missense mutation	MSS-POLE	NRAS	NM_002524:exon4:c.G394A:p.E132K	NA	NA	tolerated - low confidence	0.07	-	Likely benign	unclassified	Unreported
SNU-81	chr3	179224714	G	A	171	175	0.50578	Missense mutation	MSS-POLE	PIK3CA	NM_006218:exon16:c.G2309A:p.R770Q	benign	0.265	deleterious	0.02	VCV000872914.4	Uncertain Significance	unclassified	b
SNU-81	chr12	132676598	G	C	249	260	0.510806	Missense mutation	MSS-POLE	POLE	NM_006231:exon9:c.C857G:p.P286R	probably damaging	1	deleterious	0	VCV000376500.8	P	DRV	b
SNU-81	chr10	87933148	G	A	237	235	0.497881	Missense mutation	MSS-POLE	PTEN	NM_000314:exon5:c.G389A:p.R130Q	probably damaging	0.998	deleterious	0	VCV000007829.64	P	DRV	a
SNU-81	chr10	87957916	G	A	200	268	0.57265	Missense mutation	MSS-POLE	PTEN	NM_000314:exon7:c.G698A:p.R233Q	benign	0.134	deleterious	0.02	-	P	DRV	b
SNU-81	chr10	87960987	G	T	239	222	0.481562	Nonsense mutation	MSS-POLE	PTEN	NM_000314:exon8:c.G895T:p.E299*	NA	NA	NA	NA	VCV000428263.6	P	DRV	a; b
SNU-81	chr18	47848510	C	T	216	185	0.461347	Missense mutation	MSS-POLE	SMAD2	NM_005901:exon8:c.G962A:p.R321Q	NA	NA	NA	NA	-	P	DRV	Ku 2007
SNU-81	chr17	7674894	G	A	310	309	0.499192	Nonsense mutation	MSS-POLE	TP53	NM_000546:exon6:c.C637T:p.R213*	NA	NA	NA	NA	VCV000043590.47	P	DRV	b
SNU-81	chr17	7675217	T	G	228	210	0.479452	Missense mutation	MSS-POLE	TP53	NM_000546:exon5:c.A395C:p.K132T	NA	NA	deleterious	0	-	P	DRV	Ghandi et al., 2019
SNU-977	chr5	112835113	-	GT	112	344	0.754386	Frameshift insertion	MSS	APC	NM_000038:exon15:c.1906_1907insGT:p.G636fs	NA	NA	NA	NA	-	P	not reported	Unreported
SNU-977	chr5	112839653	-	T	443	133	0.230903	Frameshift insertion	MSS	APC	NM_000038:exon16:c.4060dupT:p.E1353fs	NA	NA	NA	NA	-	P	not reported	Ku et al., 2010
SNU-977	chr4	152326136	C	T	0	304	1	Missense mutation	MSS	FBXW7	NM_033632:exon10:c.G1514A:p.R505H	probably damaging	1	deleterious - low confidence	0	-	LP	not reported	Unreported
SNU-977	chr17	7675088	C	T	0	279	1	Missense mutation	MSS	TP53	NM_000546:exon5:c.G524A:p.R175H	NA	NA	tolerated	0.08	VCV000012374.66	P	DRV	Ku et al., 2010
SNU-C1	chr17	7675115	G	T	0	333	1	Nonsense mutation	MSS	TP53	NM_000546:exon5:c.C497A:p.S166*	NA	NA	NA	NA	-	P	DRV	Ghandi et al., 2019
SNU-C5	chr5	112840963	-	A	305	390	0.561151	Frameshift insertion	MSI	APC	NM_000038:exon16:c.5370dupA:p.R1790fs	NA	NA	NA	NA	-	P	not reported	Unreported
SNU-C5	chr1	26762191	C	-	298	303	0.50416	Frameshift deletion	MSI	ARID1A	NM_006015:exon7:c.2291delC:p.S764fs	NA	NA	NA	NA	-	P	DRV	b
SNU-C5	chr7	140753336	A	T	238	231	0.492537	Missense mutation	MSI	BRAF	NM_004333:exon15:c.T1799A:p.V600E	probably damaging	0.935	deleterious - low confidence	0	VCV000013961.129	P	DRV	Voutsadakis, 2022
SNU-C5	chr4	152323004	C	-	1	593	0.998316	Frameshift deletion	MSI	FBXW7	NM_033632:exon12:c.2001delG:p.G667fs	NA	NA	NA	NA	-	P	DRV	b
SNU-C5	chr12	68813608	G	A	223	209	0.483796	Missense mutation	MSI	MDM2	NM_002392:exon3:c.G154A:p.D52N	NA	NA	NA	NA		Unknown	unclassified	b
SNU-C5	chr8	127740561	A	G	359	323	0.473607	Missense mutation	MSI	MYC	NM_002467:exon3:c.A968G:p.N323S	NA	NA	NA	NA	-	Unknown	unclassified	b
SNU-C5	chr3	179210525	T	C	519	28	0.0511883	Missense mutation	MSI	PIK3CA	NM_006218:exon9:c.T1499C:p.V500A	NA	NA	NA	NA	-	Unknown	not reported	Unreported
SNU-C5	chr3	179234297	A	G	246	287	0.538462	Missense mutation	MSI	PIK3CA	NM_006218:exon21:c.A3140G:p.H1047R	benign	0.088	deleterious	0	VCV000013652.76	P	DRV	Voutsadakis, 2022
SNU-C5	chr17	7674221	G	A	244	223	0.477516	Missense mutation	MSI	TP53	NM_000546:exon7:c.C742T:p.R248W	NA	NA	deleterious	0	VCV000437017.6	P	DRV/CPV	Ku and Park, 2005
SNU-C5	chr17	7674879	C	A	327	293	0.472581	Missense mutation	MSI	TP53	NM_000546:exon6:c.G652T:p.V218L	NA	NA	tolerated	0.05	-	P	DRV	Ku and Park, 2005
SW1116	chr5	112801339	C	T	397	342	0.462788	Nonsense mutation	MSS	APC	NM_000038:exon8:c.C790T:p.Q264*	NA	NA	NA	NA	-	P	DRV	Mouradov et al., 2014
SW1116	chr5	112839879	CAAACCATGC	-	455	340	0.427673	Frameshift deletion	MSS	APC	NM_000038:exon16:c.4285_4294del:p.Q1429fs	NA	NA	NA	NA	-	P	DRV	b
SW1116	chr7	55170386	G	A	293	311	0.514901	Missense mutation	MSS	EGFR	NM_201284:exon16:c.G1960A:p.V654M	NA	NA	NA	NA	-	Unknown	unclassified	Berg et al., 2017;Mouradov et al., 2014
SW1116	chr4	152328248	G	A	170	173	0.504373	Missense mutation	MSS	FBXW7	NM_033632:exon9:c.C1378T:p.H460Y	NA	NA	NA	NA	-	Unknown	not reported	Berg et al., 2017
SW1116	chr1	64839603	C	T	94	113	0.545894	Missense mutation	MSS	JAK1	NM_002227:exon20:c.G2842A:p.G948R	NA	NA	NA	NA	-	Unknown	not reported	Berg et al., 2017; Mouradov et al., 2014
SW1116	chr12	25245350	C	G	182	345	0.654649	Missense mutation	MSS	KRAS	NM_004985:exon2:c.G35C:p.G12A	NA	NA	deleterious - low confidence	0	VCV000045122.13	P	DRV	Berg et al., 2017; Medico et al., 2015; Ahmed et al., 2013
SW1116	chr17	7675136	G	T	1	558	0.998211	Missense mutation	MSS	TP53	NM_000546:exon5:c.C476A:p.A159D	NA	NA	deleterious	0	-	P	DRV	Berg et al., 2017;Mouradov et al., 2014;Liu and Bodmer, 2006;Ahmed et al., 2013
SW1222	chr5	112839510	G	T	0	765	1	Nonsense mutation	MSS	APC	NM_000038:exon16:c.G3916T:p.E1306*	NA	NA	NA	NA	-	P	not reported	Rowan et al., 2000
SW1222	chr12	25225627	G	A	0	605	1	Missense mutation	MSS	KRAS	NM_004985:exon4:c.C437T:p.A146V	NA	NA	deleterious - low confidence	0	VCV000375962.10	P	not reported	Mouradov et al., 2014; Medico et al., 2015
SW1222	chr18	51078427	T	G	0	350	1	Missense mutation	MSS	SMAD4	NM_005359:exon12:c.T1619G:p.L540R	NA	NA	NA	NA	-	Unknown	not reported	Mouradov et al., 2014
SW1417	chr5	112839942	C	T	0	463	1	Nonsense mutation	MSS	APC	NM_000038:exon16:c.C4348T:p.R1450*	NA	NA	NA	NA	VCV000194585.21	P	DRV	Rowan et al., 2000
SW1417	chr7	140753336	A	T	485	333	0.40709	Missense mutation	MSS	BRAF	NM_004333:exon15:c.T1799A:p.V600E	probably damaging	0.935	deleterious - low confidence	0	VCV000013961.129	P	DRV	Mouradov et al., 2014;Medico et al., 2015
SW1417	chr1	64864935	C	T	372	162	0.303371	Missense mutation	MSS	JAK1	NM_002227:exon8:c.G1028A:p.R343Q	benign	0.061	deleterious	0.02	-	Unknown	unclassified	Mouradov et al., 2014
SW1417	chr17	7674238	CAGGAACTGTTACA	-	1	339	0.997059	Frameshift deletion	MSS	TP53	NM_000546:exon7:c.712_725del:p.C238fs	NA	NA	NA	NA	-	P	not reported	Ghandi et al., 2019; Liu and Bodmer, 2006
SW1463	chr5	112821930	TG	-	0	346	1	Frameshift deletion	MSS	APC	NM_000038:exon11:c.1347_1348del:p.A449fs	NA	NA	NA	NA	VCV000433618.3	P	DRV	b
SW1463	chr4	152326214	C	T	141	134	0.487273	Missense mutation	MSS	FBXW7	NM_033632:exon10:c.G1436A:p.R479Q	probably damaging	1	deleterious - low confidence	0	VCV000376419.1	P	DRV	Mouradov et al., 2014
SW1463	chr12	25245351	C	A	0	682	1	Missense mutation	MSS	KRAS	NM_004985:exon2:c.G34T:p.G12C	NA	NA	deleterious - low confidence	0	VCV001701193.12	P	DRV	Mouradov et al., 2014; Medico et al., 2015
SW1463	chr18	51065548	C	G	0	381	1	Missense mutation	MSS	SMAD4	NM_005359:exon9:c.C1081G:p.R361G	probably damaging	1	deleterious - low confidence	0	-	P	DRV	b
SW1463	chr17	7674220	C	T	0	427	1	Missense mutation	MSS	TP53	NM_000546:exon7:c.G743A:p.R248Q	NA	NA	deleterious	0.01	VCV000012356.73	P	DRV/CPV	Mouradov et al., 2014
SW403	chr5	112839185	C	-	276	466	0.628032	Frameshift deletion	MSS	APC	NM_000038:exon16:c.3591delC:p.F1197fs	NA	NA	NA	NA	VCV002583960.2	P	DRV	b
SW403	chr5	112839187	C	T	276	466	0.628032	Missense mutation	MSS	APC	NM_000038:exon16:c.C3593T:p.S1198L	NA	NA	NA	NA	-	Unknown	unclassified	b
SW403	chr5	112839427	C	A	434	196	0.311111	Nonsense mutation	MSS	APC	NM_000038:exon16:c.C3833A:p.S1278*	NA	NA	NA	NA	-	P	DRV	Tanaka et al., 2017
SW403	chr12	25245350	C	A	214	387	0.643927	Missense mutation	MSS	KRAS	NM_004985:exon2:c.G35T:p.G12V	NA	NA	deleterious - low confidence	0.01	VCV000012583.50	P	DRV	Mouradov et al., 2014; Medico et al., 2015
SW403	chr17	7676218	C	A	1	519	0.998077	Nonsense mutation	MSS	TP53	NM_000546:exon4:c.G151T:p.E51*	NA	NA	NA	NA	-	P	DRV	Liu and Bodmer, 2006
SW48	chr5	112843734	C	T	375	353	0.48489	Missense mutation	MSI	APC	NM_000038:exon16:c.C8140T:p.R2714C	benign	0.434	tolerated - low confidence	0.11	-	Unknown	unclassified	Berg et al., 2017; Mouradov et al., 2014
SW48	chr1	26697413	G	-	84	83	0.497006	Frameshift deletion	MSI	ARID1A	NM_006015:exon1:c.1010delG:p.W337fs	NA	NA	NA	NA	-	P	not reported	Unreported
SW48	chr1	26774911	C	-	144	134	0.482014	Frameshift deletion	MSI	ARID1A	NM_006015:exon18:c.4684delC:p.P1562fs	NA	NA	NA	NA	-	P	not reported	Unreported
SW48	chr7	140794409	G	A	824	270	0.246801	Nonsense mutation	MSI	BRAF	NM_004333:exon8:c.C1039T:p.R347*	NA	NA	NA	NA	-	Unknown	not reported	Berg et al., 2017
SW48	chr3	41224610	C	A	370	332	0.472934	Missense mutation	MSI	CTNNB1	NM_001904:exon3:c.C98A:p.S33Y	probably damaging	1	deleterious - low confidence	0	-	P	DRV	Berg et al., 2017;Mouradov et al., 2014
SW48	chr7	55174014	G	A	684	264	0.278481	Missense mutation	MSI	EGFR	NM_005228:exon18:c.G2155A	probably damaging	0.999	deleterious - low confidence	0	-	P	DRV	Berg et al., 2017;Mouradov et al., 2014
SW48	chr7	55201287	T	C	858	300	0.259067	Missense mutation	MSI	EGFR	NM_005228:exon25:c.T3046C:p.Y1016H	NA	NA	NA	NA	-	Unknown	not reported	Berg et al., 2017
SW48	chr4	152323004	C	-	395	305	0.435714	Frameshift deletion	MSI	FBXW7	NM_033632:exon12:c.2001delG:p.G667fs	NA	NA	NA	NA	-	P	DRV	Berg et al., 2017
SW48	chr3	179230077	G	A	357	307	0.462349	Missense mutation	MSI	PIK3CA	NM_006218:exon19:c.G2740A:p.G914R	possibly damaging	0.796	deleterious	0	VCV000039703.46	P	DRV	Berg et al., 2017;Mouradov et al., 2014;Medico et al., 2015
SW480	chr5	112839606	C	T	0	757	1	Nonsense mutation	MSS	APC	NM_000038:exon16:c.C4012T:p.Q1338*	NA	NA	NA	NA	VCV000000801.10	P	DRV	Berg et al., 2017; Mouradov et al., 2014
SW480	chr12	25245350	C	A	0	1112	1	Missense mutation	MSS	KRAS	NM_004985:exon2:c.G35T:p.G12V	NA	NA	deleterious - low confidence	0.01	VCV000012583.50	P	DRV	Berg et al., 2017; Medico et al., 2015; Ahmed et al., 2013
SW480	chr17	7673603	G	A	0	571	1	Missense mutation	MSS	TP53	NM_000546:exon9:c.C925T:p.P309S	NA	NA	tolerated	0.2	VCV000458575.16	P	DRV	Berg et al., 2017; Mouradov et al., 2014; Ahmed et al., 2013; Ghandi et al., 2019
SW480	chr17	7673802	C	T	0	510	1	Missense mutation	MSS	TP53	NM_000546:exon8:c.G818A:p.R273H	NA	NA	tolerated	0.07	VCV000012366.60	P	DRV	Berg et al., 2017; Mouradov et al., 2014; Ahmed et al., 2013; Liu and Bodmer, 2006
SW620	chr5	112839606	C	T	0	385	1	Nonsense mutation	MSS	APC	NM_000038:exon16:c.C4012T:p.Q1338*	NA	NA	NA	NA	VCV000000801.10	P	DRV	Berg et al., 2017; Mouradov et al., 2014
SW620	chr12	4299989	G	A	242	126	0.342391	Missense mutation	MSS	CCND2	NM_001759:exon5:c.G850A:p.V284M	possibly damaging	0.806	deleterious	0.01	-	Unknown	unclassified	Berg et al., 2017;Mouradov et al., 2014
SW620	chr12	25245350	C	A	0	811	1	Missense mutation	MSS	KRAS	NM_004985:exon2:c.G35T:p.G12V	NA	NA	deleterious - low confidence	0.01	VCV000012583.50	P	DRV	Berg et al., 2017; Medico et al., 2015; Ahmed et al., 2013
SW620	chr17	7673603	G	A	1	592	0.998314	Missense mutation	MSS	TP53	NM_000546:exon9:c.C925T:p.P309S	NA	NA	tolerated	0.2	VCV000458575.16	P	DRV	Berg et al., 2017;Mouradov et al., 2014;Ahmed et al., 2013;Ghandi et al., 2019
SW620	chr17	7673802	C	T	0	499	1	Missense mutation	MSS	TP53	NM_000546:exon8:c.G818A:p.R273H	NA	NA	tolerated	0.07	VCV000012366.60	P	DRV	Berg et al., 2017;Mouradov et al., 2014;Ahmed et al., 2013;Ghandi et al., 2019
SW837	chr5	112780895	C	T	505	228	0.31105	Nonsense mutation	MSS	APC	NM_000038:exon6:c.C637T:p.R213*	NA	NA	NA	NA	VCV000140952.31	P	DRV	b
SW837	chr5	112839942	C	T	316	675	0.68113	Nonsense mutation	MSS	APC	NM_000038:exon16:c.C4348T:p.R1450*	NA	NA	NA	NA	VCV000194585.21	P	DRV
SW837	chr4	152329699	-	A	0	292	1	Frameshift insertion	MSS	FBXW7	NM_033632:exon8:c.1208dupT:p.L403fs	NA	NA	NA	NA	-	P	DRV	b
SW837	chr12	25245351	C	A	272	304	0.527778	Missense mutation	MSS	KRAS	NM_004985:exon2:c.G34T:p.G12C	NA	NA	deleterious - low confidence	0	VCV001701193.12	P	DRV	Mouradov et al., 2014; Medico et al., 2015
SW837	chr8	127738491	G	A	406	417	0.506683	Missense mutation	MSS	MYC	NM_002467:exon2:c.G274A:p.V92I	NA	NA	NA	NA	-	Unknown	unclassified	Mouradov et al., 2014
SW837	chr17	7674221	G	A	0	316	1	Missense mutation	MSS	TP53	NM_000546:exon7:c.C742T:p.R248W	NA	NA	deleterious	0	VCV000437017.6	P	DRV/CPV	Mouradov et al., 2014;Ghandi et al., 2019;Liu and Bodmer, 2006
SW948	chr5	112838934	C	T	212	228	0.518182	Nonsense mutation	MSS	APC	NM_000038:exon16:c.C3340T:p.R1114*	NA	NA	NA	NA	VCV000236589.38	P	DRV	Berg et al., 2017; Mouradov et al., 2014
SW948	chr5	112839879	C	T	225	219	0.493243	Nonsense mutation	MSS	APC	NM_000038:exon16:c.C4285T:p.Q1429*	NA	NA	NA	NA	VCV000376063.4	P	DRV	Berg et al., 2017
SW948	chr1	26761037	G	C	210	270	0.5625	Missense mutation	MSS	ARID1A	NM_006015:exon5:c.G2102C:p.G701A	NA	NA	NA	NA	-	Unknown	not reported	Mouradov et al., 2014
SW948	chr12	25227342	T	A	173	353	0.671103	Missense mutation	MSS	KRAS	NM_004985:exon3:c.A182T:p.Q61L	NA	NA	deleterious - low confidence	0.02	VCV000045116.5	P	DRV	Berg et al., 2017; Mouradov et al., 2014; Medico et al., 2015; Ahmed et al., 2013
SW948	chr3	179218294	G	A	0	509	1	Missense mutation	MSS	PIK3CA	NM_006218:exon10:c.G1624A:p.E542K	probably damaging	0.915	deleterious	0	VCV000031944.32	P	DRV	Berg et al., 2017;Mouradov et al., 2014;Medico et al., 2015;Ahmed et al., 2013
SW948	chr18	51078417	G	T	0	352	1	Missense mutation	MSS	SMAD4	NM_005359:exon12:c.G1609T:p.D537Y	probably damaging	0.999	deleterious - low confidence	0	VCV000376000.1	P	DRV	Mouradov et al., 2014
SW948	chr17	7676018	C	-	0	459	1	Frameshift deletion	MSS	TP53	NM_000546:exon4:c.351delG:p.G117fs	NA	NA	NA	NA	-	P	DRV	Berg et al., 2017;Ahmed et al., 2013;Ghandi et al., 2019;Liu and Bodmer, 2006
T84	chr5	112840058	A	-	0	766	1	Frameshift deletion	MSS	APC	NM_000038:exon16:c.4464delA:p.L1488fs	NA	NA	NA	NA	-	P	DRV	Rowan et al., 2000
T84	chr12	25245347	C	T	403	569	0.585391	Missense mutation	MSS	KRAS	NM_004985:exon2:c.G38A:p.G13D	NA	NA	deleterious - low confidence	0.04	VCV000012580.49	P	DRV	Mouradov et al., 2014; Medico et al., 2015
T84	chr3	179218294	G	A	157	507	0.763554	Missense mutation	MSS	PIK3CA	NM_006218:exon10:c.G1624A:p.E542K	probably damaging	0.915	deleterious	0	VCV000031944.32	P	DRV	Mouradov et al., 2014; Medico et al., 2015
T84	chr18	51065487	G	C	0	231	1	Missense mutation	MSS	SMAD4	NM_005359:exon9:c.G1020C:p.K340N	NA	NA	NA	NA	-	P	DRV	Mouradov et al., 2014
TC71	chr5	112838988	G	T	571	304	0.347429	Nonsense mutation	MSI	APC	NM_000038:exon16:c.G3394T:p.E1132*	NA	NA	NA	NA	-	P	not reported	Berg et al., 2017
TC71	chr5	112839576	C	T	316	595	0.653128	Nonsense mutation	MSI	APC	NM_000038:exon16:c.C3982T:p.Q1328*	NA	NA	NA	NA	VCV000092346.24	P	not reported	Berg et al., 2017
TC71	chr1	26779487	AG	-	374	392	0.511749	Frameshift deletion	MSI	ARID1A	NM_006015:exon20:c.5589_5590del:p.T1863fs	NA	NA	NA	NA	-	P	not reported	Unreported
TC71	chr12	25245350	C	T	252	431	0.63104	Missense mutation	MSI	KRAS	NM_004985:exon2:c.G35A:p.G12D	NA	NA	deleterious - low confidence	0.04	VCV000012582.33	P	DRV	Berg et al., 2017; Ahmed et al., 2013
TC71	chr17	31252992	A	-	225	186	0.452555	Frameshift deletion	MSI	NF1	NM_001042492:exon31:c.4165delA:p.K1389fs	NA	NA	NA	NA	-	P	not reported	Berg et al., 2017
TC71	chr3	179199088	G	A	254	261	0.506796	Missense mutation	MSI	PIK3CA	NM_006218:exon2:c.G263A:p.R88Q	probably damaging	0.971	deleterious	0	VCV000376049.16	P	DRV	Berg et al., 2017
TC71	chr10	87957915	C	T	268	275	0.506446	Nonsense mutation	MSI	PTEN	NM_000314:exon7:c.C697T:p.R233*	NA	NA	NA	NA	VCV000007813.88	LP	not reported	Berg et al., 2017; Ahmed et al., 2013
TC71	chr17	7674220	C	T	493	80	0.139616	Missense mutation	MSI	TP53	NM_000546:exon7:c.G743A:p.R248Q	NA	NA	deleterious	0.01	VCV000012356.73	P	DRV/CPV	Unreported
TC71	chr17	7674894	G	A	530	195	0.268966	Nonsense mutation	MSI	TP53	NM_000546:exon6:c.C637T:p.R213*	NA	NA	NA	NA	VCV000043590.47	P	DRV	Berg et al., 2017; Ahmed et al., 2013
TC71	chr17	7675085	C	T	350	288	0.451411	Missense mutation	MSI	TP53	NM_000546:exon5:c.G527A:p.C176Y	NA	NA	deleterious	0	VCV000186451.24	P	not reported	Berg et al., 2017; Ahmed et al., 2013
VACO 9P	chr17	7674229	C	T	0	309	1	Missense mutation	MSS	TP53	NM_000546:exon7:c.G734A:p.G245D	NA	NA	deleterious	0	VCV000012355.23	LP	not reported	Berg et al., 2017;Ahmed et al., 2013;Cottu et al., 1996
WiDr	chr5	112838151	G	T	582	280	0.324826	Nonsense mutation	MSS	APC	NM_000038:exon16:c.G2557T:p.E853*	NA	NA	NA	NA	VCV001071632.8	P	not reported	Berg et al., 2017
WiDr	chr5	112840254	-	A	253	471	0.650552	Frameshift insertion	MSS	APC	NM_000038:exon16:c.4661dupA:p.E1554fs	NA	NA	NA	NA	-	P	not reported	Berg et al., 2017
WiDr	chr1	26766476	G	T	777	264	0.253602	Missense mutation	MSS	ARID1A	NM_006015:exon10:c.G2898T:p.E966D	NA	NA	NA	NA	-	Unknown	not reported	Unreported
WiDr	chr7	140753336	A	T	569	228	0.286073	Missense mutation	MSS	BRAF	NM_004333:exon15:c.T1799A:p.V600E	probably damaging	0.935	deleterious - low confidence	0	VCV000013961.129	P	DRV	Berg et al., 2017;Medico et al., 2015;Ahmed et al., 2013
WiDr	chr7	140834757	G	C	265	627	0.702915	Missense mutation	MSS	BRAF	NM_004333:exon3:c.C356G:p.T119S	NA	NA	NA	NA	-	Unknown	unclassified	Berg et al., 2017
WiDr	chr3	179210279	C	A	272	783	0.74218	Missense mutation	MSS	PIK3CA	NM_006218:exon8:c.C1345A:p.P449T	probably damaging	0.99	deleterious	0	VCV001333250.5	P	DRV	Ahmed et al., 2013
WiDr	chr18	51059892	C	T	1	519	0.998077	Nonsense mutation	MSS	SMAD4	NM_005359:exon8:c.C931T:p.Q311*	NA	NA	NA	NA	VCV000230663.4	P	DRV	Ahmed et al., 2013
WiDr	chr17	7673802	C	T	1	589	0.998305	Missense mutation	MSS	TP53	NM_000546:exon8:c.G818A:p.R273H	NA	NA	tolerated	0.07	VCV000012366.60	P	DRV	Berg et al., 2017; Ahmed et al., 2013
1 Predictions and scores reported according to Ensembl variation/pathogenicity predictions ( https://www.ensembl.org/info/genome/variation/prediction/protein_function.html). The scores can be used to assess the likelihood of a genetic variation causing a harmful effect on protein function.
2 Classification as cancer somatic driver variants (DRV) or cancer predisposition variants (CPV) according to Cell Model Passports. https://depmap.sanger.ac.uk/documentation/datasets/mutation/
a, variant reported for the cell line in Cellosaurus: https://www.cellosaurus.org/
b, variant reported for the cell line in Cell Model Passports: https://cellmodelpassports.sanger.ac.uk/

## Sheet: Supplementary Table 9
Supplementary Table S9. OncoKB variant pathogenicity description.
Gene	Entrez gene ID	Alteration	Consequence	Protein position	Gene in OncoKB1	Variant in OncoKB2	Oncogenicity	Known effect	Last update	Gene summary	Variant summary
APC	324	C1387*	stop_gained	1387	TRUE	FALSE	Likely Oncogenic	Likely Loss-of-function	2017-10-23	APC, a tumor suppressor involved in WNT signaling, is recurrently altered in colorectal cancer.	The APC C1387* is a truncating mutation in a tumor suppressor gene, and therefore is likely oncogenic.
APC	324	E1309*	stop_gained	1309	TRUE	FALSE	Likely Oncogenic	Likely Loss-of-function	2017-10-23	APC, a tumor suppressor involved in WNT signaling, is recurrently altered in colorectal cancer.	The APC E1309* is a truncating mutation in a tumor suppressor gene, and therefore is likely oncogenic.
APC	324	Q1204*	stop_gained	1204	TRUE	FALSE	Likely Oncogenic	Likely Loss-of-function	2017-10-23	APC, a tumor suppressor involved in WNT signaling, is recurrently altered in colorectal cancer.	The APC Q1204* is a truncating mutation in a tumor suppressor gene, and therefore is likely oncogenic.
APC	324	L629*	stop_gained	629	TRUE	FALSE	Likely Oncogenic	Likely Loss-of-function	2017-10-23	APC, a tumor suppressor involved in WNT signaling, is recurrently altered in colorectal cancer.	The APC L629* is a truncating mutation in a tumor suppressor gene, and therefore is likely oncogenic.
APC	324	R283*	stop_gained	283	TRUE	FALSE	Likely Oncogenic	Likely Loss-of-function	2017-10-23	APC, a tumor suppressor involved in WNT signaling, is recurrently altered in colorectal cancer.	The APC R283* is a truncating mutation in a tumor suppressor gene, and therefore is likely oncogenic.
APC	324	R640W	missense_variant	640	TRUE	FALSE	Likely Oncogenic	Likely Loss-of-function	2020-10-05	APC, a tumor suppressor involved in WNT signaling, is recurrently altered in colorectal cancer.	The APC R640W mutation has not specifically been reviewed by the OncoKB team. However, APC R640G is known to be oncogenic, and therefore APC R640W is considered likely oncogenic.
APC	324	R1450*	stop_gained	1450	TRUE	FALSE	Likely Oncogenic	Likely Loss-of-function	2017-10-23	APC, a tumor suppressor involved in WNT signaling, is recurrently altered in colorectal cancer.	The APC R1450* is a truncating mutation in a tumor suppressor gene, and therefore is likely oncogenic.
APC	324	Q1367*	stop_gained	1367	TRUE	FALSE	Likely Oncogenic	Likely Loss-of-function	2017-10-23	APC, a tumor suppressor involved in WNT signaling, is recurrently altered in colorectal cancer.	The APC Q1367* is a truncating mutation in a tumor suppressor gene, and therefore is likely oncogenic.
APC	324	S1344*	stop_gained	1344	TRUE	FALSE	Likely Oncogenic	Likely Loss-of-function	2017-10-23	APC, a tumor suppressor involved in WNT signaling, is recurrently altered in colorectal cancer.	The APC S1344* is a truncating mutation in a tumor suppressor gene, and therefore is likely oncogenic.
APC	324	S1032*		1032	TRUE	FALSE	Likely Oncogenic	Likely Loss-of-function	2017-10-23	APC, a tumor suppressor involved in WNT signaling, is recurrently altered in colorectal cancer.	The APC S1032* is a truncating mutation in a tumor suppressor gene, and therefore is likely oncogenic.
APC	324	S1044L	missense_variant	1044	TRUE	FALSE	Unknown	Unknown	2017-10-23	APC, a tumor suppressor involved in WNT signaling, is recurrently altered in colorectal cancer.	The APC S1044L mutation has not specifically been reviewed by the OncoKB team, and therefore its biological significance is unknown.
APC	324	S1068*	stop_gained	1068	TRUE	FALSE	Likely Oncogenic	Likely Loss-of-function	2017-10-23	APC, a tumor suppressor involved in WNT signaling, is recurrently altered in colorectal cancer.	The APC S1068* is a truncating mutation in a tumor suppressor gene, and therefore is likely oncogenic.
APC	324	R876*	stop_gained	876	TRUE	FALSE	Likely Oncogenic	Likely Loss-of-function	2017-10-23	APC, a tumor suppressor involved in WNT signaling, is recurrently altered in colorectal cancer.	The APC R876* is a truncating mutation in a tumor suppressor gene, and therefore is likely oncogenic.
APC	324	K1308*	stop_gained	1308	TRUE	FALSE	Likely Oncogenic	Likely Loss-of-function	2017-10-23	APC, a tumor suppressor involved in WNT signaling, is recurrently altered in colorectal cancer.	The APC K1308* is a truncating mutation in a tumor suppressor gene, and therefore is likely oncogenic.
APC	324	S811*	stop_gained	811	TRUE	FALSE	Likely Oncogenic	Likely Loss-of-function	2017-10-23	APC, a tumor suppressor involved in WNT signaling, is recurrently altered in colorectal cancer.	The APC S811* is a truncating mutation in a tumor suppressor gene, and therefore is likely oncogenic.
APC	324	R302*	stop_gained	302	TRUE	FALSE	Likely Oncogenic	Likely Loss-of-function	2017-10-23	APC, a tumor suppressor involved in WNT signaling, is recurrently altered in colorectal cancer.	The APC R302* is a truncating mutation in a tumor suppressor gene, and therefore is likely oncogenic.
APC	324	E1573*	stop_gained	1573	TRUE	FALSE	Likely Oncogenic	Likely Loss-of-function	2017-10-23	APC, a tumor suppressor involved in WNT signaling, is recurrently altered in colorectal cancer.	The APC E1573* is a truncating mutation in a tumor suppressor gene, and therefore is likely oncogenic.
APC	324	G97R	missense_variant	97	TRUE	FALSE	Unknown	Unknown	2017-10-23	APC, a tumor suppressor involved in WNT signaling, is recurrently altered in colorectal cancer.	The APC G97R mutation has not specifically been reviewed by the OncoKB team, and therefore its biological significance is unknown.
APC	324	R213*	stop_gained	213	TRUE	FALSE	Likely Oncogenic	Likely Loss-of-function	2017-10-23	APC, a tumor suppressor involved in WNT signaling, is recurrently altered in colorectal cancer.	The APC R213* is a truncating mutation in a tumor suppressor gene, and therefore is likely oncogenic.
APC	324	R405*	stop_gained	405	TRUE	FALSE	Likely Oncogenic	Likely Loss-of-function	2017-10-23	APC, a tumor suppressor involved in WNT signaling, is recurrently altered in colorectal cancer.	The APC R405* is a truncating mutation in a tumor suppressor gene, and therefore is likely oncogenic.
APC	324	E1345*	stop_gained	1345	TRUE	FALSE	Likely Oncogenic	Likely Loss-of-function	2017-10-23	APC, a tumor suppressor involved in WNT signaling, is recurrently altered in colorectal cancer.	The APC E1345* is a truncating mutation in a tumor suppressor gene, and therefore is likely oncogenic.
APC	324	R216*	stop_gained	216	TRUE	FALSE	Likely Oncogenic	Likely Loss-of-function	2017-10-23	APC, a tumor suppressor involved in WNT signaling, is recurrently altered in colorectal cancer.	The APC R216* is a truncating mutation in a tumor suppressor gene, and therefore is likely oncogenic.
APC	324	R805*	stop_gained	805	TRUE	FALSE	Likely Oncogenic	Likely Loss-of-function	2017-10-23	APC, a tumor suppressor involved in WNT signaling, is recurrently altered in colorectal cancer.	The APC R805* is a truncating mutation in a tumor suppressor gene, and therefore is likely oncogenic.
APC	324	S982*	stop_gained	982	TRUE	FALSE	Likely Oncogenic	Likely Loss-of-function	2017-10-23	APC, a tumor suppressor involved in WNT signaling, is recurrently altered in colorectal cancer.	The APC S982* is a truncating mutation in a tumor suppressor gene, and therefore is likely oncogenic.
APC	324	Q1429*	stop_gained	1429	TRUE	FALSE	Likely Oncogenic	Likely Loss-of-function	2017-10-23	APC, a tumor suppressor involved in WNT signaling, is recurrently altered in colorectal cancer.	The APC Q1429* is a truncating mutation in a tumor suppressor gene, and therefore is likely oncogenic.
APC	324	R1114*	stop_gained	1114	TRUE	FALSE	Likely Oncogenic	Likely Loss-of-function	2017-10-23	APC, a tumor suppressor involved in WNT signaling, is recurrently altered in colorectal cancer.	The APC R1114* is a truncating mutation in a tumor suppressor gene, and therefore is likely oncogenic.
APC	324	S1315*	stop_gained	1315	TRUE	TRUE	Likely Oncogenic	Likely Loss-of-function	2017-10-23	APC, a tumor suppressor involved in WNT signaling, is recurrently altered in colorectal cancer.	The APC S1315* is a truncating mutation in a tumor suppressor gene, and therefore is likely oncogenic.
APC	324	X653_splice	splice_acceptor_variant	653	TRUE	FALSE	Likely Oncogenic	Likely Loss-of-function	2017-10-23	APC, a tumor suppressor involved in WNT signaling, is recurrently altered in colorectal cancer.	The APC X653_splice is a truncating mutation in a tumor suppressor gene, and therefore is likely oncogenic.
APC	324	E1154*	stop_gained	1154	TRUE	FALSE	Likely Oncogenic	Likely Loss-of-function	2017-10-23	APC, a tumor suppressor involved in WNT signaling, is recurrently altered in colorectal cancer.	The APC E1154* is a truncating mutation in a tumor suppressor gene, and therefore is likely oncogenic.
APC	324	E582*	stop_gained	582	TRUE	FALSE	Likely Oncogenic	Likely Loss-of-function	2017-10-23	APC, a tumor suppressor involved in WNT signaling, is recurrently altered in colorectal cancer.	The APC E582* is a truncating mutation in a tumor suppressor gene, and therefore is likely oncogenic.
APC	324	Q789*	stop_gained	789	TRUE	FALSE	Likely Oncogenic	Likely Loss-of-function	2017-10-23	APC, a tumor suppressor involved in WNT signaling, is recurrently altered in colorectal cancer.	The APC Q789* is a truncating mutation in a tumor suppressor gene, and therefore is likely oncogenic.
APC	324	Q1378*	stop_gained	1378	TRUE	FALSE	Likely Oncogenic	Likely Loss-of-function	2017-10-23	APC, a tumor suppressor involved in WNT signaling, is recurrently altered in colorectal cancer.	The APC Q1378* is a truncating mutation in a tumor suppressor gene, and therefore is likely oncogenic.
APC	324	E853*	stop_gained	853	TRUE	FALSE	Likely Oncogenic	Likely Loss-of-function	2017-10-23	APC, a tumor suppressor involved in WNT signaling, is recurrently altered in colorectal cancer.	The APC E853* is a truncating mutation in a tumor suppressor gene, and therefore is likely oncogenic.
APC	324	Q1131*	stop_gained	1131	TRUE	FALSE	Likely Oncogenic	Likely Loss-of-function	2017-10-23	APC, a tumor suppressor involved in WNT signaling, is recurrently altered in colorectal cancer.	The APC Q1131* is a truncating mutation in a tumor suppressor gene, and therefore is likely oncogenic.
APC	324	Q1303*	stop_gained	1303	TRUE	FALSE	Likely Oncogenic	Likely Loss-of-function	2017-10-23	APC, a tumor suppressor involved in WNT signaling, is recurrently altered in colorectal cancer.	The APC Q1303* is a truncating mutation in a tumor suppressor gene, and therefore is likely oncogenic.
APC	324	R1463S	missense_variant	1463	TRUE	FALSE	Unknown	Unknown	2017-10-23	APC, a tumor suppressor involved in WNT signaling, is recurrently altered in colorectal cancer.	The APC R1463S mutation has not specifically been reviewed by the OncoKB team, and therefore its biological significance is unknown.
APC	324	L707P	missense_variant	707	TRUE	FALSE	Unknown	Unknown	2017-10-23	APC, a tumor suppressor involved in WNT signaling, is recurrently altered in colorectal cancer.	The APC L707P mutation has not specifically been reviewed by the OncoKB team, and therefore its biological significance is unknown.
APC	324	M431I	missense_variant	431	TRUE	FALSE	Unknown	Unknown	2017-10-23	APC, a tumor suppressor involved in WNT signaling, is recurrently altered in colorectal cancer.	The APC M431I mutation has not specifically been reviewed by the OncoKB team, and therefore its biological significance is unknown.
APC	324	Q625*	stop_gained	625	TRUE	FALSE	Likely Oncogenic	Likely Loss-of-function	2017-10-23	APC, a tumor suppressor involved in WNT signaling, is recurrently altered in colorectal cancer.	The APC Q625* is a truncating mutation in a tumor suppressor gene, and therefore is likely oncogenic.
APC	324	Q161*	stop_gained	161	TRUE	FALSE	Likely Oncogenic	Likely Loss-of-function	2017-10-23	APC, a tumor suppressor involved in WNT signaling, is recurrently altered in colorectal cancer.	The APC Q161* is a truncating mutation in a tumor suppressor gene, and therefore is likely oncogenic.
APC	324	K1030*	stop_gained	1030	TRUE	FALSE	Likely Oncogenic	Likely Loss-of-function	2017-10-23	APC, a tumor suppressor involved in WNT signaling, is recurrently altered in colorectal cancer.	The APC K1030* is a truncating mutation in a tumor suppressor gene, and therefore is likely oncogenic.
APC	324	K1370*	stop_gained	1370	TRUE	FALSE	Likely Oncogenic	Likely Loss-of-function	2017-10-23	APC, a tumor suppressor involved in WNT signaling, is recurrently altered in colorectal cancer.	The APC K1370* is a truncating mutation in a tumor suppressor gene, and therefore is likely oncogenic.
APC	324	R232*	stop_gained	232	TRUE	FALSE	Likely Oncogenic	Likely Loss-of-function	2017-10-23	APC, a tumor suppressor involved in WNT signaling, is recurrently altered in colorectal cancer.	The APC R232* is a truncating mutation in a tumor suppressor gene, and therefore is likely oncogenic.
NA	NA	NA	NA	NA	FALSE	FALSE	Unknown	Unknown	2024-06-04	NA	NA
APC	324	N1815K	missense_variant	1815	TRUE	FALSE	Unknown	Unknown	2017-10-23	APC, a tumor suppressor involved in WNT signaling, is recurrently altered in colorectal cancer.	The APC N1815K mutation has not specifically been reviewed by the OncoKB team, and therefore its biological significance is unknown.
APC	324	K1543*	stop_gained	1543	TRUE	FALSE	Likely Oncogenic	Likely Loss-of-function	2017-10-23	APC, a tumor suppressor involved in WNT signaling, is recurrently altered in colorectal cancer.	The APC K1543* is a truncating mutation in a tumor suppressor gene, and therefore is likely oncogenic.
APC	324	Q195*	stop_gained	195	TRUE	FALSE	Likely Oncogenic	Likely Loss-of-function	2017-10-23	APC, a tumor suppressor involved in WNT signaling, is recurrently altered in colorectal cancer.	The APC Q195* is a truncating mutation in a tumor suppressor gene, and therefore is likely oncogenic.
APC	324	Q1294*	stop_gained	1294	TRUE	FALSE	Likely Oncogenic	Likely Loss-of-function	2017-10-23	APC, a tumor suppressor involved in WNT signaling, is recurrently altered in colorectal cancer.	The APC Q1294* is a truncating mutation in a tumor suppressor gene, and therefore is likely oncogenic.
APC	324	Q264*	stop_gained	264	TRUE	FALSE	Likely Oncogenic	Likely Loss-of-function	2017-10-23	APC, a tumor suppressor involved in WNT signaling, is recurrently altered in colorectal cancer.	The APC Q264* is a truncating mutation in a tumor suppressor gene, and therefore is likely oncogenic.
APC	324	E1306*	stop_gained	1306	TRUE	FALSE	Likely Oncogenic	Likely Loss-of-function	2017-10-23	APC, a tumor suppressor involved in WNT signaling, is recurrently altered in colorectal cancer.	The APC E1306* is a truncating mutation in a tumor suppressor gene, and therefore is likely oncogenic.
APC	324	S1198L	missense_variant	1198	TRUE	FALSE	Unknown	Unknown	2017-10-23	APC, a tumor suppressor involved in WNT signaling, is recurrently altered in colorectal cancer.	The APC S1198L mutation has not specifically been reviewed by the OncoKB team, and therefore its biological significance is unknown.
APC	324	S1278*	stop_gained	1278	TRUE	FALSE	Likely Oncogenic	Likely Loss-of-function	2017-10-23	APC, a tumor suppressor involved in WNT signaling, is recurrently altered in colorectal cancer.	The APC S1278* is a truncating mutation in a tumor suppressor gene, and therefore is likely oncogenic.
APC	324	Q1338*	stop_gained	1338	TRUE	FALSE	Likely Oncogenic	Likely Loss-of-function	2017-10-23	APC, a tumor suppressor involved in WNT signaling, is recurrently altered in colorectal cancer.	The APC Q1338* is a truncating mutation in a tumor suppressor gene, and therefore is likely oncogenic.
APC	324	E418*	stop_gained	418	TRUE	FALSE	Likely Oncogenic	Likely Loss-of-function	2017-10-23	APC, a tumor suppressor involved in WNT signaling, is recurrently altered in colorectal cancer.	The APC E418* is a truncating mutation in a tumor suppressor gene, and therefore is likely oncogenic.
APC	324	R856C	missense_variant	856	TRUE	FALSE	Unknown	Unknown	2017-10-23	APC, a tumor suppressor involved in WNT signaling, is recurrently altered in colorectal cancer.	The APC R856C mutation has not specifically been reviewed by the OncoKB team, and therefore its biological significance is unknown.
APC	324	R727M	missense_variant	727	TRUE	FALSE	Unknown	Unknown	2017-10-23	APC, a tumor suppressor involved in WNT signaling, is recurrently altered in colorectal cancer.	The APC R727M mutation has not specifically been reviewed by the OncoKB team, and therefore its biological significance is unknown.
APC	324	K993N	missense_variant	993	TRUE	FALSE	Unknown	Unknown	2017-10-23	APC, a tumor suppressor involved in WNT signaling, is recurrently altered in colorectal cancer.	The APC K993N mutation has not specifically been reviewed by the OncoKB team, and therefore its biological significance is unknown.
APC	324	R2166*	stop_gained	2166	TRUE	FALSE	Likely Oncogenic	Likely Loss-of-function	2017-10-23	APC, a tumor suppressor involved in WNT signaling, is recurrently altered in colorectal cancer.	The APC R2166* is a truncating mutation in a tumor suppressor gene, and therefore is likely oncogenic.
APC	324	R2525C	missense_variant	2525	TRUE	FALSE	Unknown	Unknown	2017-10-23	APC, a tumor suppressor involved in WNT signaling, is recurrently altered in colorectal cancer.	The APC R2525C mutation has not specifically been reviewed by the OncoKB team, and therefore its biological significance is unknown.
APC	324	K1561N	missense_variant	1561	TRUE	FALSE	Unknown	Unknown	2017-10-23	APC, a tumor suppressor involved in WNT signaling, is recurrently altered in colorectal cancer.	The APC K1561N mutation has not specifically been reviewed by the OncoKB team, and therefore its biological significance is unknown.
APC	324	I1779M	missense_variant	1779	TRUE	FALSE	Unknown	Unknown	2017-10-23	APC, a tumor suppressor involved in WNT signaling, is recurrently altered in colorectal cancer.	The APC I1779M mutation has not specifically been reviewed by the OncoKB team, and therefore its biological significance is unknown.
APC	324	E2550Q	missense_variant	2550	TRUE	FALSE	Unknown	Unknown	2017-10-23	APC, a tumor suppressor involved in WNT signaling, is recurrently altered in colorectal cancer.	The APC E2550Q mutation has not specifically been reviewed by the OncoKB team, and therefore its biological significance is unknown.
APC	324	G471E	missense_variant	471	TRUE	FALSE	Unknown	Unknown	2017-10-23	APC, a tumor suppressor involved in WNT signaling, is recurrently altered in colorectal cancer.	The APC G471E mutation has not specifically been reviewed by the OncoKB team, and therefore its biological significance is unknown.
APC	324	A697V	missense_variant	697	TRUE	FALSE	Unknown	Unknown	2017-10-23	APC, a tumor suppressor involved in WNT signaling, is recurrently altered in colorectal cancer.	The APC A697V mutation has not specifically been reviewed by the OncoKB team, and therefore its biological significance is unknown.
APC	324	R2816Q	missense_variant	2816	TRUE	FALSE	Unknown	Unknown	2017-10-23	APC, a tumor suppressor involved in WNT signaling, is recurrently altered in colorectal cancer.	The APC R2816Q mutation has not specifically been reviewed by the OncoKB team, and therefore its biological significance is unknown.
APC	324	E46G	missense_variant	46	TRUE	FALSE	Unknown	Unknown	2017-10-23	APC, a tumor suppressor involved in WNT signaling, is recurrently altered in colorectal cancer.	The APC E46G mutation has not specifically been reviewed by the OncoKB team, and therefore its biological significance is unknown.
APC	324	T305A	missense_variant	305	TRUE	FALSE	Unknown	Unknown	2017-10-23	APC, a tumor suppressor involved in WNT signaling, is recurrently altered in colorectal cancer.	The APC T305A mutation has not specifically been reviewed by the OncoKB team, and therefore its biological significance is unknown.
APC	324	R2714C	missense_variant	2714	TRUE	FALSE	Unknown	Unknown	2017-10-23	APC, a tumor suppressor involved in WNT signaling, is recurrently altered in colorectal cancer.	The APC R2714C mutation has not specifically been reviewed by the OncoKB team, and therefore its biological significance is unknown.
APC	324	E1132*	stop_gained	1132	TRUE	FALSE	Likely Oncogenic	Likely Loss-of-function	2017-10-23	APC, a tumor suppressor involved in WNT signaling, is recurrently altered in colorectal cancer.	The APC E1132* is a truncating mutation in a tumor suppressor gene, and therefore is likely oncogenic.
APC	324	Q1328*	stop_gained	1328	TRUE	TRUE	Likely Oncogenic	Likely Loss-of-function	2017-10-23	APC, a tumor suppressor involved in WNT signaling, is recurrently altered in colorectal cancer.	The APC Q1328* is a truncating mutation in a tumor suppressor gene, and therefore is likely oncogenic.
APC	324	S1400L	missense_variant	1400	TRUE	TRUE	Unknown	Unknown	2017-10-23	APC, a tumor suppressor involved in WNT signaling, is recurrently altered in colorectal cancer.	There is no available functional data about the APC S1400L mutation (last reviewed on 03/09/2017), and therefore its biological significance is unknown.
APC	324	R168I	missense_variant	168	TRUE	FALSE	Unknown	Unknown	2017-10-23	APC, a tumor suppressor involved in WNT signaling, is recurrently altered in colorectal cancer.	The APC R168I mutation has not specifically been reviewed by the OncoKB team, and therefore its biological significance is unknown.
APC	324	L665*	stop_gained	665	TRUE	FALSE	Likely Oncogenic	Likely Loss-of-function	2017-10-23	APC, a tumor suppressor involved in WNT signaling, is recurrently altered in colorectal cancer.	The APC L665* is a truncating mutation in a tumor suppressor gene, and therefore is likely oncogenic.
APC	324	S1864Y	missense_variant	1864	TRUE	FALSE	Unknown	Unknown	2017-10-23	APC, a tumor suppressor involved in WNT signaling, is recurrently altered in colorectal cancer.	The APC S1864Y mutation has not specifically been reviewed by the OncoKB team, and therefore its biological significance is unknown.
APC	324	I2167S	missense_variant	2167	TRUE	FALSE	Unknown	Unknown	2017-10-23	APC, a tumor suppressor involved in WNT signaling, is recurrently altered in colorectal cancer.	The APC I2167S mutation has not specifically been reviewed by the OncoKB team, and therefore its biological significance is unknown.
APC	324	N2720K	missense_variant	2720	TRUE	FALSE	Unknown	Unknown	2017-10-23	APC, a tumor suppressor involved in WNT signaling, is recurrently altered in colorectal cancer.	The APC N2720K mutation has not specifically been reviewed by the OncoKB team, and therefore its biological significance is unknown.
APC	324	A545V	missense_variant	545	TRUE	FALSE	Unknown	Unknown	2017-10-23	APC, a tumor suppressor involved in WNT signaling, is recurrently altered in colorectal cancer.	The APC A545V mutation has not specifically been reviewed by the OncoKB team, and therefore its biological significance is unknown.
APC	324	R564*	stop_gained	564	TRUE	FALSE	Likely Oncogenic	Likely Loss-of-function	2017-10-23	APC, a tumor suppressor involved in WNT signaling, is recurrently altered in colorectal cancer.	The APC R564* is a truncating mutation in a tumor suppressor gene, and therefore is likely oncogenic.
APC	324	S331L	missense_variant	331	TRUE	FALSE	Unknown	Unknown	2017-10-23	APC, a tumor suppressor involved in WNT signaling, is recurrently altered in colorectal cancer.	The APC S331L mutation has not specifically been reviewed by the OncoKB team, and therefore its biological significance is unknown.
APC	324	S1196*	stop_gained	1196	TRUE	FALSE	Likely Oncogenic	Likely Loss-of-function	2017-10-23	APC, a tumor suppressor involved in WNT signaling, is recurrently altered in colorectal cancer.	The APC S1196* is a truncating mutation in a tumor suppressor gene, and therefore is likely oncogenic.
APC	324	L360*	stop_gained	360	TRUE	FALSE	Likely Oncogenic	Likely Loss-of-function	2017-10-23	APC, a tumor suppressor involved in WNT signaling, is recurrently altered in colorectal cancer.	The APC L360* is a truncating mutation in a tumor suppressor gene, and therefore is likely oncogenic.
APC	324	S1392*	stop_gained	1392	TRUE	FALSE	Likely Oncogenic	Likely Loss-of-function	2017-10-23	APC, a tumor suppressor involved in WNT signaling, is recurrently altered in colorectal cancer.	The APC S1392* is a truncating mutation in a tumor suppressor gene, and therefore is likely oncogenic.
APC	324	R2204*	stop_gained	2204	TRUE	FALSE	Likely Oncogenic	Likely Loss-of-function	2017-10-23	APC, a tumor suppressor involved in WNT signaling, is recurrently altered in colorectal cancer.	The APC R2204* is a truncating mutation in a tumor suppressor gene, and therefore is likely oncogenic.
ARID1A	8289	Q1424*	stop_gained	1424	TRUE	FALSE	Likely Oncogenic	Likely Loss-of-function	2023-10-12	ARID1A, a tumor suppressor involved in transcriptional regulation, is inactivated by mutation in various cancer types including endometrial and bladder cancers.	The ARID1A Q1424* is a truncating mutation in a tumor suppressor gene, and therefore is likely oncogenic.
ARID1A	8289	R693*	stop_gained	693	TRUE	FALSE	Likely Oncogenic	Likely Loss-of-function	2023-10-12	ARID1A, a tumor suppressor involved in transcriptional regulation, is inactivated by mutation in various cancer types including endometrial and bladder cancers.	The ARID1A R693* is a truncating mutation in a tumor suppressor gene, and therefore is likely oncogenic.
ARID1A	8289	A281P	missense_variant	281	TRUE	FALSE	Unknown	Unknown	2018-01-30	ARID1A, a tumor suppressor involved in transcriptional regulation, is inactivated by mutation in various cancer types including endometrial and bladder cancers.	The ARID1A A281P mutation has not specifically been reviewed by the OncoKB team, and therefore its biological significance is unknown.
NA	NA	NA	NA	NA	FALSE	FALSE	Unknown	Unknown	2024-06-04	NA	NA
ARID1A	8289	G701A	missense_variant	701	TRUE	FALSE	Unknown	Unknown	2018-01-30	ARID1A, a tumor suppressor involved in transcriptional regulation, is inactivated by mutation in various cancer types including endometrial and bladder cancers.	The ARID1A G701A mutation has not specifically been reviewed by the OncoKB team, and therefore its biological significance is unknown.
ARID1A	8289	E966D	missense_variant	966	TRUE	FALSE	Unknown	Unknown	2018-01-30	ARID1A, a tumor suppressor involved in transcriptional regulation, is inactivated by mutation in various cancer types including endometrial and bladder cancers.	The ARID1A E966D mutation has not specifically been reviewed by the OncoKB team, and therefore its biological significance is unknown.
ARID1A	8289	A2235V	missense_variant	2235	TRUE	FALSE	Unknown	Unknown	2018-01-30	ARID1A, a tumor suppressor involved in transcriptional regulation, is inactivated by mutation in various cancer types including endometrial and bladder cancers.	The ARID1A A2235V mutation has not specifically been reviewed by the OncoKB team, and therefore its biological significance is unknown.
ARID1A	8289	R219L	missense_variant	219	TRUE	FALSE	Unknown	Unknown	2018-01-30	ARID1A, a tumor suppressor involved in transcriptional regulation, is inactivated by mutation in various cancer types including endometrial and bladder cancers.	The ARID1A R219L mutation has not specifically been reviewed by the OncoKB team, and therefore its biological significance is unknown.
ARID1A	8289	Q561H	missense_variant	561	TRUE	FALSE	Unknown	Unknown	2018-01-30	ARID1A, a tumor suppressor involved in transcriptional regulation, is inactivated by mutation in various cancer types including endometrial and bladder cancers.	The ARID1A Q561H mutation has not specifically been reviewed by the OncoKB team, and therefore its biological significance is unknown.
ARID1A	8289	G423R	missense_variant	423	TRUE	FALSE	Unknown	Unknown	2018-01-30	ARID1A, a tumor suppressor involved in transcriptional regulation, is inactivated by mutation in various cancer types including endometrial and bladder cancers.	The ARID1A G423R mutation has not specifically been reviewed by the OncoKB team, and therefore its biological significance is unknown.
ARID1A	8289	R1989*	stop_gained	1989	TRUE	FALSE	Likely Oncogenic	Likely Loss-of-function	2023-10-12	ARID1A, a tumor suppressor involved in transcriptional regulation, is inactivated by mutation in various cancer types including endometrial and bladder cancers.	The ARID1A R1989* is a truncating mutation in a tumor suppressor gene, and therefore is likely oncogenic.
ARID1A	8289	R1223H	missense_variant	1223	TRUE	FALSE	Unknown	Unknown	2018-01-30	ARID1A, a tumor suppressor involved in transcriptional regulation, is inactivated by mutation in various cancer types including endometrial and bladder cancers.	The ARID1A R1223H mutation has not specifically been reviewed by the OncoKB team, and therefore its biological significance is unknown.
ARID1A	8289	E1726D	missense_variant	1726	TRUE	FALSE	Unknown	Unknown	2018-01-30	ARID1A, a tumor suppressor involved in transcriptional regulation, is inactivated by mutation in various cancer types including endometrial and bladder cancers.	The ARID1A E1726D mutation has not specifically been reviewed by the OncoKB team, and therefore its biological significance is unknown.
ARID1A	8289	A2065T	missense_variant	2065	TRUE	FALSE	Unknown	Unknown	2018-01-30	ARID1A, a tumor suppressor involved in transcriptional regulation, is inactivated by mutation in various cancer types including endometrial and bladder cancers.	The ARID1A A2065T mutation has not specifically been reviewed by the OncoKB team, and therefore its biological significance is unknown.
BRAF	673	V600E	missense_variant	600	TRUE	TRUE	Oncogenic	Gain-of-function	2024-05-30	BRAF, an intracellular kinase, is frequently mutated in melanoma, thyroid and lung cancers among others.	The BRAF V600E mutation is known to be oncogenic.
BRAF	673	T119S	missense_variant	119	TRUE	FALSE	Unknown	Unknown	2024-05-30	BRAF, an intracellular kinase, is frequently mutated in melanoma, thyroid and lung cancers among others.	The BRAF T119S mutation has not specifically been reviewed by the OncoKB team, and therefore its biological significance is unknown.
BRAF	673	N581Y	missense_variant	581	TRUE	TRUE	Likely Oncogenic	Likely Gain-of-function	2024-05-30	BRAF, an intracellular kinase, is frequently mutated in melanoma, thyroid and lung cancers among others.	The BRAF N581Y mutation is likely oncogenic.
BRAF	673	E204L	missense_variant	204	TRUE	FALSE	Unknown	Unknown	2024-05-30	BRAF, an intracellular kinase, is frequently mutated in melanoma, thyroid and lung cancers among others.	The BRAF E204L mutation has not specifically been reviewed by the OncoKB team, and therefore its biological significance is unknown.
BRAF	673	V600K	missense_variant	600	TRUE	TRUE	Oncogenic	Gain-of-function	2024-05-30	BRAF, an intracellular kinase, is frequently mutated in melanoma, thyroid and lung cancers among others.	The BRAF V600K mutation is known to be oncogenic.
BRAF	673	G596R	missense_variant	596	TRUE	TRUE	Oncogenic	Gain-of-function	2024-05-30	BRAF, an intracellular kinase, is frequently mutated in melanoma, thyroid and lung cancers among others.	The BRAF G596R mutation is known to be oncogenic.
BRAF	673	K601N	missense_variant	601	TRUE	TRUE	Oncogenic	Gain-of-function	2024-05-30	BRAF, an intracellular kinase, is frequently mutated in melanoma, thyroid and lung cancers among others.	The BRAF K601N mutation is known to be oncogenic.
BRAF	673	A712T	missense_variant	712	TRUE	TRUE	Likely Neutral	Likely Neutral	2024-05-30	BRAF, an intracellular kinase, is frequently mutated in melanoma, thyroid and lung cancers among others.	The BRAF A712T mutation is likely neutral.
BRAF	673	D211G	missense_variant	211	TRUE	FALSE	Unknown	Unknown	2024-05-30	BRAF, an intracellular kinase, is frequently mutated in melanoma, thyroid and lung cancers among others.	The BRAF D211G mutation has not specifically been reviewed by the OncoKB team, and therefore its biological significance is unknown.
BRAF	673	D594G	missense_variant	594	TRUE	TRUE	Oncogenic	Gain-of-function	2024-05-30	BRAF, an intracellular kinase, is frequently mutated in melanoma, thyroid and lung cancers among others.	The BRAF D594G mutation is known to be oncogenic.
BRAF	673	R347*	stop_gained	347	TRUE	FALSE	Unknown	Unknown	2024-05-30	BRAF, an intracellular kinase, is frequently mutated in melanoma, thyroid and lung cancers among others.	BRAF is considered an oncogene and truncating mutations in oncogenes are typically nonfunctional.
BRAF	673	R354Q	missense_variant	354	TRUE	TRUE	Unknown	Unknown	2024-05-30	BRAF, an intracellular kinase, is frequently mutated in melanoma, thyroid and lung cancers among others.	There is no available functional data about the BRAF R354Q mutation (last reviewed on 03/28/2023), and therefore its biological significance is unknown.
CCND2	894	V284M	missense_variant	284	TRUE	FALSE	Unknown	Unknown	2018-02-22	CCND2, a regulator of the cell cycle, is amplified in various cancer types.	The CCND2 V284M mutation has not specifically been reviewed by the OncoKB team, and therefore its biological significance is unknown.
CCND2	894	L100R	missense_variant	100	TRUE	FALSE	Unknown	Unknown	2018-02-22	CCND2, a regulator of the cell cycle, is amplified in various cancer types.	The CCND2 L100R mutation has not specifically been reviewed by the OncoKB team, and therefore its biological significance is unknown.
CCND2	894	L4M	missense_variant	4	TRUE	FALSE	Unknown	Unknown	2018-02-22	CCND2, a regulator of the cell cycle, is amplified in various cancer types.	The CCND2 L4M mutation has not specifically been reviewed by the OncoKB team, and therefore its biological significance is unknown.
CTNNB1	1499	G245A	missense_variant	245	TRUE	FALSE	Unknown	Unknown	2017-03-09	CTNNB1 (Î²-catenin), a transcriptional activator, is recurrently mutated in various cancers including endometrial and hepatocellular cancers.	The CTNNB1 G245A mutation has not specifically been reviewed by the OncoKB team, and therefore its biological significance is unknown.
CTNNB1	1499	K354Q	missense_variant	354	TRUE	FALSE	Unknown	Unknown	2017-03-09	CTNNB1 (Î²-catenin), a transcriptional activator, is recurrently mutated in various cancers including endometrial and hepatocellular cancers.	The CTNNB1 K354Q mutation has not specifically been reviewed by the OncoKB team, and therefore its biological significance is unknown.
CTNNB1	1499	L275F	missense_variant	275	TRUE	FALSE	Unknown	Unknown	2017-03-09	CTNNB1 (Î²-catenin), a transcriptional activator, is recurrently mutated in various cancers including endometrial and hepatocellular cancers.	The CTNNB1 L275F mutation has not specifically been reviewed by the OncoKB team, and therefore its biological significance is unknown.
CTNNB1	1499	A655E	missense_variant	655	TRUE	FALSE	Unknown	Unknown	2017-03-09	CTNNB1 (Î²-catenin), a transcriptional activator, is recurrently mutated in various cancers including endometrial and hepatocellular cancers.	The CTNNB1 A655E mutation has not specifically been reviewed by the OncoKB team, and therefore its biological significance is unknown.
CTNNB1	1499	Q601R	missense_variant	601	TRUE	FALSE	Unknown	Unknown	2017-03-09	CTNNB1 (Î²-catenin), a transcriptional activator, is recurrently mutated in various cancers including endometrial and hepatocellular cancers.	The CTNNB1 Q601R mutation has not specifically been reviewed by the OncoKB team, and therefore its biological significance is unknown.
CTNNB1	1499	S45F	missense_variant	45	TRUE	TRUE	Likely Oncogenic	Gain-of-function	2020-11-16	CTNNB1 (Î²-catenin), a transcriptional activator, is recurrently mutated in various cancers including endometrial and hepatocellular cancers.	The CTNNB1 S45F mutation is likely oncogenic.
CTNNB1	1499	L447P	missense_variant	447	TRUE	FALSE	Unknown	Unknown	2017-03-09	CTNNB1 (Î²-catenin), a transcriptional activator, is recurrently mutated in various cancers including endometrial and hepatocellular cancers.	The CTNNB1 L447P mutation has not specifically been reviewed by the OncoKB team, and therefore its biological significance is unknown.
CTNNB1	1499	S33Y	missense_variant	33	TRUE	TRUE	Oncogenic	Gain-of-function	2020-11-16	CTNNB1 (Î²-catenin), a transcriptional activator, is recurrently mutated in various cancers including endometrial and hepatocellular cancers.	The CTNNB1 S33Y mutation is known to be oncogenic.
CTNNB1	1499	R587Q	missense_variant	587	TRUE	TRUE	Unknown	Unknown	2017-03-09	CTNNB1 (Î²-catenin), a transcriptional activator, is recurrently mutated in various cancers including endometrial and hepatocellular cancers.	There is no available functional data about the CTNNB1 R587Q mutation (last reviewed on 03/09/2017), and therefore its biological significance is unknown.
CTNNB1	1499	Q28H	missense_variant	28	TRUE	FALSE	Unknown	Unknown	2017-03-09	CTNNB1 (Î²-catenin), a transcriptional activator, is recurrently mutated in various cancers including endometrial and hepatocellular cancers.	The CTNNB1 Q28H mutation has not specifically been reviewed by the OncoKB team, and therefore its biological significance is unknown.
CTNNB1	1499	E334K	missense_variant	334	TRUE	TRUE	Unknown	Unknown	2017-03-09	CTNNB1 (Î²-catenin), a transcriptional activator, is recurrently mutated in various cancers including endometrial and hepatocellular cancers.	There is no available functional data about the CTNNB1 E334K mutation (last reviewed on 03/09/2017), and therefore its biological significance is unknown.
CTNNB1	1499	A525V	missense_variant	525	TRUE	FALSE	Unknown	Unknown	2017-03-09	CTNNB1 (Î²-catenin), a transcriptional activator, is recurrently mutated in various cancers including endometrial and hepatocellular cancers.	The CTNNB1 A525V mutation has not specifically been reviewed by the OncoKB team, and therefore its biological significance is unknown.
CTNNB1	1499	R474Q	missense_variant	474	TRUE	FALSE	Unknown	Unknown	2017-03-09	CTNNB1 (Î²-catenin), a transcriptional activator, is recurrently mutated in various cancers including endometrial and hepatocellular cancers.	The CTNNB1 R474Q mutation has not specifically been reviewed by the OncoKB team, and therefore its biological significance is unknown.
EGFR	1956	E282K	missense_variant	282	TRUE	TRUE	Likely Neutral	Likely Neutral	2019-03-21	EGFR, a receptor tyrosine kinase, is altered by amplification and/or mutation in lung and brain cancers among others.	The EGFR E282K mutation is likely neutral.
EGFR	1956	A1048V	missense_variant	1048	TRUE	FALSE	Unknown	Unknown	2018-06-04	EGFR, a receptor tyrosine kinase, is altered by amplification and/or mutation in lung and brain cancers among others.	The EGFR A1048V mutation has not specifically been reviewed by the OncoKB team, and therefore its biological significance is unknown.
EGFR	1956	*627*	intron_variant	NA	TRUE	FALSE	Unknown	Unknown	2018-06-04	EGFR, a receptor tyrosine kinase, is altered by amplification and/or mutation in lung and brain cancers among others.	The EGFR *627* mutation has not specifically been reviewed by the OncoKB team, and therefore its biological significance is unknown.
EGFR	1956	K487E	missense_variant	487	TRUE	FALSE	Unknown	Unknown	2018-06-04	EGFR, a receptor tyrosine kinase, is altered by amplification and/or mutation in lung and brain cancers among others.	The EGFR K487E mutation has not specifically been reviewed by the OncoKB team, and therefore its biological significance is unknown.
EGFR	1956	G573*	stop_gained	573	TRUE	FALSE	Unknown	Unknown	2018-06-04	EGFR, a receptor tyrosine kinase, is altered by amplification and/or mutation in lung and brain cancers among others.	EGFR is considered an oncogene and truncating mutations in oncogenes are typically nonfunctional.
EGFR	1956	G719S	missense_variant	719	TRUE	TRUE	Oncogenic	Gain-of-function	2024-05-23	EGFR, a receptor tyrosine kinase, is altered by amplification and/or mutation in lung and brain cancers among others.	The EGFR G719S mutation is known to be oncogenic.
EGFR	1956	Y1016H	missense_variant	1016	TRUE	FALSE	Unknown	Unknown	2018-06-04	EGFR, a receptor tyrosine kinase, is altered by amplification and/or mutation in lung and brain cancers among others.	The EGFR Y1016H mutation has not specifically been reviewed by the OncoKB team, and therefore its biological significance is unknown.
EGFR	1956	R675W	missense_variant	675	TRUE	TRUE	Unknown	Unknown	2023-05-15	EGFR, a receptor tyrosine kinase, is altered by amplification and/or mutation in lung and brain cancers among others.	There is no available functional data about the EGFR R675W mutation (last reviewed on 05/15/2023), and therefore its biological significance is unknown.
EGFR	1956	K28N	missense_variant	28	TRUE	TRUE	Unknown	Unknown	2023-06-05	EGFR, a receptor tyrosine kinase, is altered by amplification and/or mutation in lung and brain cancers among others.	There is no available functional data about the EGFR K28N mutation (last reviewed on 06/05/2023), and therefore its biological significance is unknown.
ERBB2	2064	L465V	missense_variant	465	TRUE	FALSE	Unknown	Unknown	2019-11-06	ERBB2, a receptor tyrosine kinase, is altered by mutation, amplification and/or overexpression in various cancer types, most frequently in breast, esophagogastric and endometrial cancers.	The ERBB2 L465V mutation has not specifically been reviewed by the OncoKB team, and therefore its biological significance is unknown.
ERBB2	2064	S310F	missense_variant	310	TRUE	TRUE	Oncogenic	Gain-of-function	2024-05-13	ERBB2, a receptor tyrosine kinase, is altered by mutation, amplification and/or overexpression in various cancer types, most frequently in breast, esophagogastric and endometrial cancers.	The ERBB2 S310F mutation is known to be oncogenic.
ERBB2	2064	G668V	missense_variant	668	TRUE	FALSE	Unknown	Unknown	2019-11-06	ERBB2, a receptor tyrosine kinase, is altered by mutation, amplification and/or overexpression in various cancer types, most frequently in breast, esophagogastric and endometrial cancers.	The ERBB2 G668V mutation has not specifically been reviewed by the OncoKB team, and therefore its biological significance is unknown.
ERBB2	2064	P230L	missense_variant	230	TRUE	FALSE	Unknown	Unknown	2019-11-06	ERBB2, a receptor tyrosine kinase, is altered by mutation, amplification and/or overexpression in various cancer types, most frequently in breast, esophagogastric and endometrial cancers.	The ERBB2 P230L mutation has not specifically been reviewed by the OncoKB team, and therefore its biological significance is unknown.
ERBB2	2064	L796P	missense_variant	796	TRUE	FALSE	Unknown	Unknown	2019-11-06	ERBB2, a receptor tyrosine kinase, is altered by mutation, amplification and/or overexpression in various cancer types, most frequently in breast, esophagogastric and endometrial cancers.	The ERBB2 L796P mutation has not specifically been reviewed by the OncoKB team, and therefore its biological significance is unknown.
ERBB2	2064	R816H	missense_variant	816	TRUE	FALSE	Unknown	Unknown	2019-11-06	ERBB2, a receptor tyrosine kinase, is altered by mutation, amplification and/or overexpression in various cancer types, most frequently in breast, esophagogastric and endometrial cancers.	The ERBB2 R816H mutation has not specifically been reviewed by the OncoKB team, and therefore its biological significance is unknown.
FBXW7	55294	R278*	stop_gained	278	TRUE	TRUE	Likely Oncogenic	Likely Loss-of-function	2019-09-05	FBXW7, a tumor suppressor involved in protein degradation, is inactivated by mutation in various cancer types, most frequently in endometrial and colorectal cancers.	The FBXW7 R278* is a truncating mutation in a tumor suppressor gene, and therefore is likely oncogenic.
FBXW7	55294	R479Q	missense_variant	479	TRUE	TRUE	Oncogenic	Loss-of-function	2023-03-08	FBXW7, a tumor suppressor involved in protein degradation, is inactivated by mutation in various cancer types, most frequently in endometrial and colorectal cancers.	The FBXW7 R479Q mutation is known to be oncogenic.
FBXW7	55294	R222*	stop_gained	222	TRUE	FALSE	Likely Oncogenic	Likely Loss-of-function	2018-11-01	FBXW7, a tumor suppressor involved in protein degradation, is inactivated by mutation in various cancer types, most frequently in endometrial and colorectal cancers.	The FBXW7 R222* is a truncating mutation in a tumor suppressor gene, and therefore is likely oncogenic.
FBXW7	55294	T196A	missense_variant	196	TRUE	TRUE	Unknown	Unknown	2019-09-05	FBXW7, a tumor suppressor involved in protein degradation, is inactivated by mutation in various cancer types, most frequently in endometrial and colorectal cancers.	There is no available functional data about the FBXW7 T196A mutation (last reviewed on 09/05/2019), and therefore its biological significance is unknown.
FBXW7	55294	X548_splice	splice_donor_variant	548	TRUE	FALSE	Likely Oncogenic	Likely Loss-of-function	2018-11-01	FBXW7, a tumor suppressor involved in protein degradation, is inactivated by mutation in various cancer types, most frequently in endometrial and colorectal cancers.	The FBXW7 X548_splice is a truncating mutation in a tumor suppressor gene, and therefore is likely oncogenic.
FBXW7	55294	*167*	intron_variant	NA	TRUE	FALSE	Unknown	Unknown	2018-11-01	FBXW7, a tumor suppressor involved in protein degradation, is inactivated by mutation in various cancer types, most frequently in endometrial and colorectal cancers.	The FBXW7 *167* mutation has not specifically been reviewed by the OncoKB team, and therefore its biological significance is unknown.
FBXW7	55294	R465C	missense_variant	465	TRUE	TRUE	Oncogenic	Loss-of-function	2019-10-28	FBXW7, a tumor suppressor involved in protein degradation, is inactivated by mutation in various cancer types, most frequently in endometrial and colorectal cancers.	The FBXW7 R465C mutation is known to be oncogenic.
FBXW7	55294	R505C	missense_variant	505	TRUE	TRUE	Oncogenic	Loss-of-function	2019-10-28	FBXW7, a tumor suppressor involved in protein degradation, is inactivated by mutation in various cancer types, most frequently in endometrial and colorectal cancers.	The FBXW7 R505C mutation is known to be oncogenic.
FBXW7	55294	Y545C	missense_variant	545	TRUE	TRUE	Likely Oncogenic	Likely Loss-of-function	2023-03-22	FBXW7, a tumor suppressor involved in protein degradation, is inactivated by mutation in various cancer types, most frequently in endometrial and colorectal cancers.	The FBXW7 Y545C mutation is likely oncogenic.
FBXW7	55294	R505H	missense_variant	505	TRUE	TRUE	Likely Oncogenic	Likely Loss-of-function	2023-01-24	FBXW7, a tumor suppressor involved in protein degradation, is inactivated by mutation in various cancer types, most frequently in endometrial and colorectal cancers.	There is no available functional data about the FBXW7 R505H mutation (last reviewed on 01/24/2023). However, it has been identified as a statistically significant hotspot and is likely to be oncogenic.
FBXW7	55294	H460Y	missense_variant	460	TRUE	FALSE	Unknown	Unknown	2018-11-01	FBXW7, a tumor suppressor involved in protein degradation, is inactivated by mutation in various cancer types, most frequently in endometrial and colorectal cancers.	The FBXW7 H460Y mutation has not specifically been reviewed by the OncoKB team, and therefore its biological significance is unknown.
FBXW7	55294	*168*	intron_variant	NA	TRUE	FALSE	Unknown	Unknown	2018-11-01	FBXW7, a tumor suppressor involved in protein degradation, is inactivated by mutation in various cancer types, most frequently in endometrial and colorectal cancers.	The FBXW7 *168* mutation has not specifically been reviewed by the OncoKB team, and therefore its biological significance is unknown.
FBXW7	55294	R479*	stop_gained	479	TRUE	FALSE	Likely Oncogenic	Likely Loss-of-function	2018-11-01	FBXW7, a tumor suppressor involved in protein degradation, is inactivated by mutation in various cancer types, most frequently in endometrial and colorectal cancers.	The FBXW7 R479* is a truncating mutation in a tumor suppressor gene, and therefore is likely oncogenic.
FBXW7	55294	R658*	stop_gained	658	TRUE	FALSE	Likely Oncogenic	Likely Loss-of-function	2018-11-01	FBXW7, a tumor suppressor involved in protein degradation, is inactivated by mutation in various cancer types, most frequently in endometrial and colorectal cancers.	The FBXW7 R658* is a truncating mutation in a tumor suppressor gene, and therefore is likely oncogenic.
FBXW7	55294	S601F	missense_variant	601	TRUE	FALSE	Unknown	Unknown	2018-11-01	FBXW7, a tumor suppressor involved in protein degradation, is inactivated by mutation in various cancer types, most frequently in endometrial and colorectal cancers.	The FBXW7 S601F mutation has not specifically been reviewed by the OncoKB team, and therefore its biological significance is unknown.
FBXW7	55294	E248D	missense_variant	248	TRUE	FALSE	Unknown	Unknown	2018-11-01	FBXW7, a tumor suppressor involved in protein degradation, is inactivated by mutation in various cancer types, most frequently in endometrial and colorectal cancers.	The FBXW7 E248D mutation has not specifically been reviewed by the OncoKB team, and therefore its biological significance is unknown.
FBXW7	55294	R689W	missense_variant	689	TRUE	TRUE	Likely Oncogenic	Likely Loss-of-function	2023-02-01	FBXW7, a tumor suppressor involved in protein degradation, is inactivated by mutation in various cancer types, most frequently in endometrial and colorectal cancers.	The FBXW7 R689W mutation is likely oncogenic.
FBXW7	55294	*168*	intron_variant	NA	TRUE	FALSE	Unknown	Unknown	2018-11-01	FBXW7, a tumor suppressor involved in protein degradation, is inactivated by mutation in various cancer types, most frequently in endometrial and colorectal cancers.	The FBXW7 *168* mutation has not specifically been reviewed by the OncoKB team, and therefore its biological significance is unknown.
FBXW7	55294	*168*	intron_variant	NA	TRUE	FALSE	Unknown	Unknown	2018-11-01	FBXW7, a tumor suppressor involved in protein degradation, is inactivated by mutation in various cancer types, most frequently in endometrial and colorectal cancers.	The FBXW7 *168* mutation has not specifically been reviewed by the OncoKB team, and therefore its biological significance is unknown.
FBXW7	55294	R14Q	missense_variant	14	TRUE	TRUE	Likely Oncogenic	Unknown	2023-02-03	FBXW7, a tumor suppressor involved in protein degradation, is inactivated by mutation in various cancer types, most frequently in endometrial and colorectal cancers.	There is no available functional data about the FBXW7 R14Q mutation (last reviewed on 02/03/2023). However, it has been identified as a statistically significant hotspot and is likely to be oncogenic.
FBXW7	55294	D591Y	missense_variant	591	TRUE	FALSE	Unknown	Unknown	2018-11-01	FBXW7, a tumor suppressor involved in protein degradation, is inactivated by mutation in various cancer types, most frequently in endometrial and colorectal cancers.	The FBXW7 D591Y mutation has not specifically been reviewed by the OncoKB team, and therefore its biological significance is unknown.
FBXW7	55294	E103*	stop_gained	103	TRUE	FALSE	Likely Oncogenic	Likely Loss-of-function	2018-11-01	FBXW7, a tumor suppressor involved in protein degradation, is inactivated by mutation in various cancer types, most frequently in endometrial and colorectal cancers.	The FBXW7 E103* is a truncating mutation in a tumor suppressor gene, and therefore is likely oncogenic.
JAK1	3716	I375V	missense_variant	375	TRUE	FALSE	Unknown	Unknown	2019-02-04	JAK1, an intracellular kinase, is frequently altered in hematologic malignancies and gynecological cancers.	The JAK1 I375V mutation has not specifically been reviewed by the OncoKB team, and therefore its biological significance is unknown.
JAK1	3716	M203I	missense_variant	203	TRUE	FALSE	Unknown	Unknown	2019-02-04	JAK1, an intracellular kinase, is frequently altered in hematologic malignancies and gynecological cancers.	The JAK1 M203I mutation has not specifically been reviewed by the OncoKB team, and therefore its biological significance is unknown.
JAK1	3716	C892F	missense_variant	892	TRUE	FALSE	Unknown	Unknown	2019-02-04	JAK1, an intracellular kinase, is frequently altered in hematologic malignancies and gynecological cancers.	The JAK1 C892F mutation has not specifically been reviewed by the OncoKB team, and therefore its biological significance is unknown.
JAK1	3716	E1051Q	missense_variant	1051	TRUE	FALSE	Unknown	Unknown	2019-02-04	JAK1, an intracellular kinase, is frequently altered in hematologic malignancies and gynecological cancers.	The JAK1 E1051Q mutation has not specifically been reviewed by the OncoKB team, and therefore its biological significance is unknown.
JAK1	3716	G948R	missense_variant	948	TRUE	FALSE	Unknown	Unknown	2019-02-04	JAK1, an intracellular kinase, is frequently altered in hematologic malignancies and gynecological cancers.	The JAK1 G948R mutation has not specifically been reviewed by the OncoKB team, and therefore its biological significance is unknown.
JAK1	3716	R343Q	missense_variant	343	TRUE	FALSE	Unknown	Unknown	2019-02-04	JAK1, an intracellular kinase, is frequently altered in hematologic malignancies and gynecological cancers.	The JAK1 R343Q mutation has not specifically been reviewed by the OncoKB team, and therefore its biological significance is unknown.
JAK1	3716	R681W	missense_variant	681	TRUE	FALSE	Unknown	Unknown	2019-02-04	JAK1, an intracellular kinase, is frequently altered in hematologic malignancies and gynecological cancers.	The JAK1 R681W mutation has not specifically been reviewed by the OncoKB team, and therefore its biological significance is unknown.
JAK1	3716	E897K	missense_variant	897	TRUE	FALSE	Unknown	Unknown	2019-02-04	JAK1, an intracellular kinase, is frequently altered in hematologic malignancies and gynecological cancers.	The JAK1 E897K mutation has not specifically been reviewed by the OncoKB team, and therefore its biological significance is unknown.
JAK1	3716	R755Q	missense_variant	755	TRUE	FALSE	Unknown	Unknown	2019-02-04	JAK1, an intracellular kinase, is frequently altered in hematologic malignancies and gynecological cancers.	The JAK1 R755Q mutation has not specifically been reviewed by the OncoKB team, and therefore its biological significance is unknown.
KRAS	3845	G12C	missense_variant	12	TRUE	TRUE	Oncogenic	Gain-of-function	2024-04-15	KRAS, a GTPase which functions as an upstream regulator of the MAPK pathway, is frequently mutated in various cancer types including lung, colorectal and pancreatic cancers.	The KRAS G12C mutation is known to be oncogenic.
KRAS	3845	A146V	missense_variant	146	TRUE	TRUE	Likely Oncogenic	Gain-of-function	2023-08-23	KRAS, a GTPase which functions as an upstream regulator of the MAPK pathway, is frequently mutated in various cancer types including lung, colorectal and pancreatic cancers.	The KRAS A146V mutation is likely oncogenic.
KRAS	3845	G12A	missense_variant	12	TRUE	TRUE	Oncogenic	Gain-of-function	2023-12-05	KRAS, a GTPase which functions as an upstream regulator of the MAPK pathway, is frequently mutated in various cancer types including lung, colorectal and pancreatic cancers.	The KRAS G12A mutation is known to be oncogenic.
KRAS	3845	Q61H	missense_variant	61	TRUE	TRUE	Oncogenic	Gain-of-function	2023-08-23	KRAS, a GTPase which functions as an upstream regulator of the MAPK pathway, is frequently mutated in various cancer types including lung, colorectal and pancreatic cancers.	The KRAS Q61H mutation is known to be oncogenic.
KRAS	3845	V14I	missense_variant	14	TRUE	TRUE	Likely Oncogenic	Likely Gain-of-function	2023-08-22	KRAS, a GTPase which functions as an upstream regulator of the MAPK pathway, is frequently mutated in various cancer types including lung, colorectal and pancreatic cancers.	The KRAS V14I mutation is likely oncogenic.
KRAS	3845	G12D	missense_variant	12	TRUE	TRUE	Oncogenic	Gain-of-function	2023-12-05	KRAS, a GTPase which functions as an upstream regulator of the MAPK pathway, is frequently mutated in various cancer types including lung, colorectal and pancreatic cancers.	The KRAS G12D mutation is known to be oncogenic.
KRAS	3845	G13D	missense_variant	13	TRUE	TRUE	Oncogenic	Gain-of-function	2023-02-24	KRAS, a GTPase which functions as an upstream regulator of the MAPK pathway, is frequently mutated in various cancer types including lung, colorectal and pancreatic cancers.	The KRAS G13D mutation is known to be oncogenic.
KRAS	3845	G12V	missense_variant	12	TRUE	TRUE	Oncogenic	Gain-of-function	2023-12-05	KRAS, a GTPase which functions as an upstream regulator of the MAPK pathway, is frequently mutated in various cancer types including lung, colorectal and pancreatic cancers.	The KRAS G12V mutation is known to be oncogenic.
KRAS	3845	A146T	missense_variant	146	TRUE	TRUE	Oncogenic	Gain-of-function	2023-08-22	KRAS, a GTPase which functions as an upstream regulator of the MAPK pathway, is frequently mutated in various cancer types including lung, colorectal and pancreatic cancers.	The KRAS A146T mutation is known to be oncogenic.
KRAS	3845	A59G	missense_variant	59	TRUE	TRUE	Oncogenic	Gain-of-function	2023-02-24	KRAS, a GTPase which functions as an upstream regulator of the MAPK pathway, is frequently mutated in various cancer types including lung, colorectal and pancreatic cancers.	The KRAS A59G mutation is known to be oncogenic.
KRAS	3845	G12S	missense_variant	12	TRUE	TRUE	Oncogenic	Gain-of-function	2023-12-05	KRAS, a GTPase which functions as an upstream regulator of the MAPK pathway, is frequently mutated in various cancer types including lung, colorectal and pancreatic cancers.	The KRAS G12S mutation is known to be oncogenic.
KRAS	3845	R97I	missense_variant	97	TRUE	TRUE	Unknown	Unknown	2023-07-31	KRAS, a GTPase which functions as an upstream regulator of the MAPK pathway, is frequently mutated in various cancer types including lung, colorectal and pancreatic cancers.	There is no available functional data about the KRAS R97I mutation (last reviewed on 07/31/2023), and therefore its biological significance is unknown.
KRAS	3845	Q61L	missense_variant	61	TRUE	TRUE	Oncogenic	Gain-of-function	2023-02-24	KRAS, a GTPase which functions as an upstream regulator of the MAPK pathway, is frequently mutated in various cancer types including lung, colorectal and pancreatic cancers.	The KRAS Q61L mutation is known to be oncogenic.
KRAS	3845	V14A	missense_variant	14	TRUE	FALSE	Likely Oncogenic	Likely Gain-of-function	2023-08-22	KRAS, a GTPase which functions as an upstream regulator of the MAPK pathway, is frequently mutated in various cancer types including lung, colorectal and pancreatic cancers.	The KRAS V14A mutation has not specifically been reviewed by the OncoKB team. However, KRAS V14I is likely oncogenic, and therefore KRAS V14A is considered likely oncogenic.
KRAS	3845	K117N	missense_variant	117	TRUE	TRUE	Oncogenic	Gain-of-function	2023-02-24	KRAS, a GTPase which functions as an upstream regulator of the MAPK pathway, is frequently mutated in various cancer types including lung, colorectal and pancreatic cancers.	The KRAS K117N mutation is known to be oncogenic.
KRAS	3845	E98*	stop_gained	98	TRUE	TRUE	Likely Neutral	Likely Loss-of-function	2023-08-22	KRAS, a GTPase which functions as an upstream regulator of the MAPK pathway, is frequently mutated in various cancer types including lung, colorectal and pancreatic cancers.	The KRAS E98* mutation is likely neutral.
MDM2	4193	D52N	missense_variant	52	TRUE	FALSE	Unknown	Unknown	2017-01-20	MDM2, a ubiquitin ligase and p53 inhibitor, is amplified in a diverse range of cancers including well-differentiated liposarcomas.	The MDM2 D52N mutation has not specifically been reviewed by the OncoKB team, and therefore its biological significance is unknown.
MDM2	4193	K475N	missense_variant	475	TRUE	FALSE	Unknown	Unknown	2017-01-20	MDM2, a ubiquitin ligase and p53 inhibitor, is amplified in a diverse range of cancers including well-differentiated liposarcomas.	The MDM2 K475N mutation has not specifically been reviewed by the OncoKB team, and therefore its biological significance is unknown.
MDM2	4193	I410S	missense_variant	410	TRUE	FALSE	Unknown	Unknown	2017-01-20	MDM2, a ubiquitin ligase and p53 inhibitor, is amplified in a diverse range of cancers including well-differentiated liposarcomas.	The MDM2 I410S mutation has not specifically been reviewed by the OncoKB team, and therefore its biological significance is unknown.
MYC	4609	N323S	missense_variant	323	TRUE	FALSE	Unknown	Unknown	2019-08-28	MYC, a transcription factor, is altered by chromosomal rearrangement, amplification and overexpression in a variety of cancer types.	The MYC N323S mutation has not specifically been reviewed by the OncoKB team, and therefore its biological significance is unknown.
MYC	4609	V92I	missense_variant	92	TRUE	FALSE	Unknown	Unknown	2019-08-28	MYC, a transcription factor, is altered by chromosomal rearrangement, amplification and overexpression in a variety of cancer types.	The MYC V92I mutation has not specifically been reviewed by the OncoKB team, and therefore its biological significance is unknown.
MYC	4609	A336V	missense_variant	336	TRUE	FALSE	Unknown	Unknown	2019-08-28	MYC, a transcription factor, is altered by chromosomal rearrangement, amplification and overexpression in a variety of cancer types.	The MYC A336V mutation has not specifically been reviewed by the OncoKB team, and therefore its biological significance is unknown.
NF1	4763	R2429*	stop_gained	2429	TRUE	TRUE	Likely Oncogenic	Likely Loss-of-function	2023-02-22	NF1, a negative regulator of RAS, is inactivated by mutation or deletion in various solid and hematologic malignancies.	The NF1 R2429* mutation is likely oncogenic.
NF1	4763	R601Q	missense_variant	601	TRUE	FALSE	Unknown	Unknown	2020-04-14	NF1, a negative regulator of RAS, is inactivated by mutation or deletion in various solid and hematologic malignancies.	The NF1 R601Q mutation has not specifically been reviewed by the OncoKB team, and therefore its biological significance is unknown.
NF1	4763	D176N	missense_variant	176	TRUE	FALSE	Unknown	Unknown	2020-04-14	NF1, a negative regulator of RAS, is inactivated by mutation or deletion in various solid and hematologic malignancies.	The NF1 D176N mutation has not specifically been reviewed by the OncoKB team, and therefore its biological significance is unknown.
NF1	4763	R160M	missense_variant	160	TRUE	FALSE	Unknown	Unknown	2020-04-14	NF1, a negative regulator of RAS, is inactivated by mutation or deletion in various solid and hematologic malignancies.	The NF1 R160M mutation has not specifically been reviewed by the OncoKB team, and therefore its biological significance is unknown.
NF1	4763	E2318Q	missense_variant	2318	TRUE	FALSE	Unknown	Unknown	2020-04-14	NF1, a negative regulator of RAS, is inactivated by mutation or deletion in various solid and hematologic malignancies.	The NF1 E2318Q mutation has not specifically been reviewed by the OncoKB team, and therefore its biological significance is unknown.
NF1	4763	A2596V	missense_variant	2596	TRUE	FALSE	Unknown	Unknown	2020-04-14	NF1, a negative regulator of RAS, is inactivated by mutation or deletion in various solid and hematologic malignancies.	The NF1 A2596V mutation has not specifically been reviewed by the OncoKB team, and therefore its biological significance is unknown.
NF1	4763	P388T	missense_variant	388	TRUE	FALSE	Unknown	Unknown	2020-04-14	NF1, a negative regulator of RAS, is inactivated by mutation or deletion in various solid and hematologic malignancies.	The NF1 P388T mutation has not specifically been reviewed by the OncoKB team, and therefore its biological significance is unknown.
NF1	4763	A74D	missense_variant	74	TRUE	FALSE	Unknown	Unknown	2020-04-14	NF1, a negative regulator of RAS, is inactivated by mutation or deletion in various solid and hematologic malignancies.	The NF1 A74D mutation has not specifically been reviewed by the OncoKB team, and therefore its biological significance is unknown.
NF1	4763	P2456S	missense_variant	2456	TRUE	TRUE	Unknown	Unknown	2023-11-21	NF1, a negative regulator of RAS, is inactivated by mutation or deletion in various solid and hematologic malignancies.	There is no available functional data about the NF1 P2456S mutation (last reviewed on 11/21/2023), and therefore its biological significance is unknown.
NF1	4763	F945L	missense_variant	945	TRUE	FALSE	Unknown	Unknown	2020-04-14	NF1, a negative regulator of RAS, is inactivated by mutation or deletion in various solid and hematologic malignancies.	The NF1 F945L mutation has not specifically been reviewed by the OncoKB team, and therefore its biological significance is unknown.
NF1	4763	L1361R	missense_variant	1361	TRUE	FALSE	Unknown	Unknown	2020-04-14	NF1, a negative regulator of RAS, is inactivated by mutation or deletion in various solid and hematologic malignancies.	The NF1 L1361R mutation has not specifically been reviewed by the OncoKB team, and therefore its biological significance is unknown.
NF1	4763	R1674Q	missense_variant	1674	TRUE	FALSE	Unknown	Unknown	2020-04-14	NF1, a negative regulator of RAS, is inactivated by mutation or deletion in various solid and hematologic malignancies.	The NF1 R1674Q mutation has not specifically been reviewed by the OncoKB team, and therefore its biological significance is unknown.
NF1	4763	V2184A	missense_variant	2184	TRUE	FALSE	Unknown	Unknown	2020-04-14	NF1, a negative regulator of RAS, is inactivated by mutation or deletion in various solid and hematologic malignancies.	The NF1 V2184A mutation has not specifically been reviewed by the OncoKB team, and therefore its biological significance is unknown.
NF1	4763	E230*	stop_gained	230	TRUE	FALSE	Likely Oncogenic	Likely Loss-of-function	2023-02-22	NF1, a negative regulator of RAS, is inactivated by mutation or deletion in various solid and hematologic malignancies.	The NF1 E230* is a truncating mutation in a tumor suppressor gene, and therefore is likely oncogenic.
NF1	4763	E479*	stop_gained	479	TRUE	FALSE	Likely Oncogenic	Likely Loss-of-function	2023-02-22	NF1, a negative regulator of RAS, is inactivated by mutation or deletion in various solid and hematologic malignancies.	The NF1 E479* is a truncating mutation in a tumor suppressor gene, and therefore is likely oncogenic.
NF1	4763	E1562*	stop_gained	1562	TRUE	FALSE	Likely Oncogenic	Likely Loss-of-function	2023-02-22	NF1, a negative regulator of RAS, is inactivated by mutation or deletion in various solid and hematologic malignancies.	The NF1 E1562* is a truncating mutation in a tumor suppressor gene, and therefore is likely oncogenic.
NF1	4763	K609N	missense_variant	609	TRUE	FALSE	Unknown	Unknown	2020-04-14	NF1, a negative regulator of RAS, is inactivated by mutation or deletion in various solid and hematologic malignancies.	The NF1 K609N mutation has not specifically been reviewed by the OncoKB team, and therefore its biological significance is unknown.
NF1	4763	E595*	stop_gained	595	TRUE	FALSE	Likely Oncogenic	Likely Loss-of-function	2023-02-22	NF1, a negative regulator of RAS, is inactivated by mutation or deletion in various solid and hematologic malignancies.	The NF1 E595* is a truncating mutation in a tumor suppressor gene, and therefore is likely oncogenic.
NF1	4763	R1241*	stop_gained	1241	TRUE	TRUE	Likely Oncogenic	Likely Loss-of-function	2023-11-17	NF1, a negative regulator of RAS, is inactivated by mutation or deletion in various solid and hematologic malignancies.	The NF1 R1241* is a truncating mutation in a tumor suppressor gene, and therefore is likely oncogenic.
NF1	4763	D2524G	missense_variant	2524	TRUE	FALSE	Unknown	Unknown	2020-04-14	NF1, a negative regulator of RAS, is inactivated by mutation or deletion in various solid and hematologic malignancies.	The NF1 D2524G mutation has not specifically been reviewed by the OncoKB team, and therefore its biological significance is unknown.
NF1	4763	R1362*	stop_gained	1362	TRUE	FALSE	Likely Oncogenic	Likely Loss-of-function	2023-02-22	NF1, a negative regulator of RAS, is inactivated by mutation or deletion in various solid and hematologic malignancies.	The NF1 R1362* is a truncating mutation in a tumor suppressor gene, and therefore is likely oncogenic.
NF1	4763	X1424_splice	splice_acceptor_variant	1424	TRUE	FALSE	Likely Oncogenic	Likely Loss-of-function	2023-02-22	NF1, a negative regulator of RAS, is inactivated by mutation or deletion in various solid and hematologic malignancies.	The NF1 X1424_splice is a truncating mutation in a tumor suppressor gene, and therefore is likely oncogenic.
NF1	4763	T1902M	missense_variant	1902	TRUE	FALSE	Unknown	Unknown	2020-04-14	NF1, a negative regulator of RAS, is inactivated by mutation or deletion in various solid and hematologic malignancies.	The NF1 T1902M mutation has not specifically been reviewed by the OncoKB team, and therefore its biological significance is unknown.
NF1	4763	L2734F	missense_variant	2734	TRUE	FALSE	Unknown	Unknown	2020-04-14	NF1, a negative regulator of RAS, is inactivated by mutation or deletion in various solid and hematologic malignancies.	The NF1 L2734F mutation has not specifically been reviewed by the OncoKB team, and therefore its biological significance is unknown.
NRAS	4893	G12D	missense_variant	12	TRUE	TRUE	Oncogenic	Gain-of-function	2023-02-23	NRAS, a GTPase, is mutated in a diverse range of cancers, most frequently in melanoma and thyroid cancer.	The NRAS G12D mutation is known to be oncogenic.
NRAS	4893	G12V	missense_variant	12	TRUE	TRUE	Oncogenic	Gain-of-function	2023-02-23	NRAS, a GTPase, is mutated in a diverse range of cancers, most frequently in melanoma and thyroid cancer.	The NRAS G12V mutation is known to be oncogenic.
NRAS	4893	A91V	missense_variant	91	TRUE	FALSE	Unknown	Unknown	2017-04-19	NRAS, a GTPase, is mutated in a diverse range of cancers, most frequently in melanoma and thyroid cancer.	The NRAS A91V mutation has not specifically been reviewed by the OncoKB team, and therefore its biological significance is unknown.
NRAS	4893	E132K	missense_variant	132	TRUE	TRUE	Likely Neutral	Likely Neutral	2023-08-23	NRAS, a GTPase, is mutated in a diverse range of cancers, most frequently in melanoma and thyroid cancer.	The NRAS E132K mutation is likely neutral.
PIK3CA	5290	R1023Q	missense_variant	1023	TRUE	TRUE	Unknown	Unknown	2019-02-04	PIK3CA, the catalytic subunit of PI3-kinase, is frequently mutated in a diverse range of cancers including breast, endometrial and cervical cancers.	There is no available functional data about the PIK3CA R1023Q mutation (last reviewed on 08/04/2017), and therefore its biological significance is unknown.
PIK3CA	5290	E545K	missense_variant	545	TRUE	TRUE	Oncogenic	Gain-of-function	2024-03-12	PIK3CA, the catalytic subunit of PI3-kinase, is frequently mutated in a diverse range of cancers including breast, endometrial and cervical cancers.	The PIK3CA E545K mutation is known to be oncogenic.
PIK3CA	5290	E542K	missense_variant	542	TRUE	TRUE	Oncogenic	Gain-of-function	2024-03-12	PIK3CA, the catalytic subunit of PI3-kinase, is frequently mutated in a diverse range of cancers including breast, endometrial and cervical cancers.	The PIK3CA E542K mutation is known to be oncogenic.
PIK3CA	5290	P449T	missense_variant	449	TRUE	TRUE	Oncogenic	Gain-of-function	2024-03-12	PIK3CA, the catalytic subunit of PI3-kinase, is frequently mutated in a diverse range of cancers including breast, endometrial and cervical cancers.	The PIK3CA P449T mutation is known to be oncogenic.
PIK3CA	5290	E545A	missense_variant	545	TRUE	TRUE	Oncogenic	Gain-of-function	2024-03-12	PIK3CA, the catalytic subunit of PI3-kinase, is frequently mutated in a diverse range of cancers including breast, endometrial and cervical cancers.	The PIK3CA E545A mutation is known to be oncogenic.
PIK3CA	5290	H1047R	missense_variant	1047	TRUE	TRUE	Oncogenic	Gain-of-function	2024-03-12	PIK3CA, the catalytic subunit of PI3-kinase, is frequently mutated in a diverse range of cancers including breast, endometrial and cervical cancers.	The PIK3CA H1047R mutation is known to be oncogenic.
PIK3CA	5290	D549N	missense_variant	549	TRUE	TRUE	Oncogenic	Gain-of-function	2024-03-12	PIK3CA, the catalytic subunit of PI3-kinase, is frequently mutated in a diverse range of cancers including breast, endometrial and cervical cancers.	The PIK3CA D549N mutation is known to be oncogenic.
PIK3CA	5290	V500A	missense_variant	500	TRUE	FALSE	Unknown	Unknown	2019-02-04	PIK3CA, the catalytic subunit of PI3-kinase, is frequently mutated in a diverse range of cancers including breast, endometrial and cervical cancers.	The PIK3CA V500A mutation has not specifically been reviewed by the OncoKB team, and therefore its biological significance is unknown.
PIK3CA	5290	G914R	missense_variant	914	TRUE	TRUE	Likely Oncogenic	Likely Gain-of-function	2024-03-12	PIK3CA, the catalytic subunit of PI3-kinase, is frequently mutated in a diverse range of cancers including breast, endometrial and cervical cancers.	The PIK3CA G914R mutation is likely oncogenic.
PIK3CA	5290	R88Q	missense_variant	88	TRUE	TRUE	Oncogenic	Gain-of-function	2024-03-12	PIK3CA, the catalytic subunit of PI3-kinase, is frequently mutated in a diverse range of cancers including breast, endometrial and cervical cancers.	The PIK3CA R88Q mutation is known to be oncogenic.
PIK3CA	5290	W590R	missense_variant	590	TRUE	FALSE	Unknown	Unknown	2019-02-04	PIK3CA, the catalytic subunit of PI3-kinase, is frequently mutated in a diverse range of cancers including breast, endometrial and cervical cancers.	The PIK3CA W590R mutation has not specifically been reviewed by the OncoKB team, and therefore its biological significance is unknown.
PIK3CA	5290	R808W	missense_variant	808	TRUE	TRUE	Unknown	Unknown	2019-02-04	PIK3CA, the catalytic subunit of PI3-kinase, is frequently mutated in a diverse range of cancers including breast, endometrial and cervical cancers.	There is no available functional data about the PIK3CA R808W mutation (last reviewed on 10/16/2018), and therefore its biological significance is unknown.
PIK3CA	5290	Y631*	stop_gained	631	TRUE	FALSE	Unknown	Unknown	2019-02-04	PIK3CA, the catalytic subunit of PI3-kinase, is frequently mutated in a diverse range of cancers including breast, endometrial and cervical cancers.	PIK3CA is considered an oncogene and truncating mutations in oncogenes are typically nonfunctional.
PIK3CA	5290	E321D	missense_variant	321	TRUE	FALSE	Unknown	Unknown	2019-02-04	PIK3CA, the catalytic subunit of PI3-kinase, is frequently mutated in a diverse range of cancers including breast, endometrial and cervical cancers.	The PIK3CA E321D mutation has not specifically been reviewed by the OncoKB team, and therefore its biological significance is unknown.
PIK3CA	5290	R770Q	missense_variant	770	TRUE	TRUE	Unknown	Unknown	2019-02-04	PIK3CA, the catalytic subunit of PI3-kinase, is frequently mutated in a diverse range of cancers including breast, endometrial and cervical cancers.	There is no available functional data about the PIK3CA R770Q mutation (last reviewed on 10/16/2018), and therefore its biological significance is unknown.
POLE	5426	S459F	missense_variant	459	TRUE	TRUE	Likely Oncogenic	Loss-of-function	2024-05-30	POLE, the catalytic subunit of DNA polymerase epsilon, is an enzyme involved in DNA replication and repair. Select POLE mutations lead to ultra-high mutation rates, most frequently in endometrial and colorectal cancer.	The POLE S459F mutation is likely oncogenic.
POLE	5426	P286R	missense_variant	286	TRUE	TRUE	Oncogenic	Loss-of-function	2024-05-30	POLE, the catalytic subunit of DNA polymerase epsilon, is an enzyme involved in DNA replication and repair. Select POLE mutations lead to ultra-high mutation rates, most frequently in endometrial and colorectal cancer.	The POLE P286R mutation is known to be oncogenic.
POLE	5426	V411L	missense_variant	411	TRUE	TRUE	Oncogenic	Loss-of-function	2024-05-30	POLE, the catalytic subunit of DNA polymerase epsilon, is an enzyme involved in DNA replication and repair. Select POLE mutations lead to ultra-high mutation rates, most frequently in endometrial and colorectal cancer.	The POLE V411L mutation is known to be oncogenic.
PTEN	5728	D310G	missense_variant	310	TRUE	FALSE	Unknown	Unknown	2018-06-04	PTEN, a lipid and protein phosphatase, is one of the most frequently mutated genes in cancer.	The PTEN D310G mutation has not specifically been reviewed by the OncoKB team, and therefore its biological significance is unknown.
PTEN	5728	R233*	stop_gained	233	TRUE	FALSE	Likely Oncogenic	Likely Loss-of-function	2023-11-28	PTEN, a lipid and protein phosphatase, is one of the most frequently mutated genes in cancer.	The PTEN R233* is a truncating mutation in a tumor suppressor gene, and therefore is likely oncogenic.
PTEN	5728	G129*	stop_gained	129	TRUE	FALSE	Likely Oncogenic	Likely Loss-of-function	2023-11-28	PTEN, a lipid and protein phosphatase, is one of the most frequently mutated genes in cancer.	The PTEN G129* is a truncating mutation in a tumor suppressor gene, and therefore is likely oncogenic.
PTEN	5728	R130Q	missense_variant	130	TRUE	TRUE	Oncogenic	Loss-of-function	2023-11-28	PTEN, a lipid and protein phosphatase, is one of the most frequently mutated genes in cancer.	The PTEN R130Q mutation is known to be oncogenic.
PTEN	5728	Y46C	missense_variant	46	TRUE	FALSE	Unknown	Unknown	2018-06-04	PTEN, a lipid and protein phosphatase, is one of the most frequently mutated genes in cancer.	The PTEN Y46C mutation has not specifically been reviewed by the OncoKB team, and therefore its biological significance is unknown.
PTEN	5728	F341V	missense_variant	341	TRUE	TRUE	Oncogenic	Loss-of-function	2023-11-28	PTEN, a lipid and protein phosphatase, is one of the most frequently mutated genes in cancer.	The PTEN F341V mutation is known to be oncogenic.
PTEN	5728	E7*	stop_gained	7	TRUE	TRUE	Likely Oncogenic	Likely Loss-of-function	2023-11-28	PTEN, a lipid and protein phosphatase, is one of the most frequently mutated genes in cancer.	The PTEN E7* is a truncating mutation in a tumor suppressor gene, and therefore is likely oncogenic.
PTEN	5728	V45I	missense_variant	45	TRUE	FALSE	Unknown	Unknown	2018-06-04	PTEN, a lipid and protein phosphatase, is one of the most frequently mutated genes in cancer.	The PTEN V45I mutation has not specifically been reviewed by the OncoKB team, and therefore its biological significance is unknown.
PTEN	5728	R142Q	missense_variant	142	TRUE	FALSE	Unknown	Unknown	2018-06-04	PTEN, a lipid and protein phosphatase, is one of the most frequently mutated genes in cancer.	The PTEN R142Q mutation has not specifically been reviewed by the OncoKB team, and therefore its biological significance is unknown.
PTEN	5728	R233Q	missense_variant	233	TRUE	TRUE	Unknown	Unknown	2018-06-04	PTEN, a lipid and protein phosphatase, is one of the most frequently mutated genes in cancer.	There is no available functional data about the PTEN R233Q mutation (last reviewed on 11/01/2017), and therefore its biological significance is unknown.
PTEN	5728	E299*	stop_gained	299	TRUE	FALSE	Likely Oncogenic	Likely Loss-of-function	2023-11-28	PTEN, a lipid and protein phosphatase, is one of the most frequently mutated genes in cancer.	The PTEN E299* is a truncating mutation in a tumor suppressor gene, and therefore is likely oncogenic.
SMAD2	4087	S464*	stop_gained	464	TRUE	FALSE	Likely Oncogenic	Likely Loss-of-function	2017-04-07	SMAD2 encodes a tumor suppressor and transcription factor that is a downstream effector in the TGF-ÃŸ signal transduction pathway. SMAD2 is infrequently mutated in a diverse range of cancers.	The SMAD2 S464* is a truncating mutation in a tumor suppressor gene, and therefore is likely oncogenic.
SMAD2	4087	S465N	missense_variant	465	TRUE	FALSE	Likely Oncogenic	Likely Loss-of-function	2021-03-30	SMAD2 encodes a tumor suppressor and transcription factor that is a downstream effector in the TGF-ÃŸ signal transduction pathway. SMAD2 is infrequently mutated in a diverse range of cancers.	The SMAD2 S465N mutation has not specifically been reviewed by the OncoKB team. However, SMAD2 S465A is likely oncogenic, and therefore SMAD2 S465N is considered likely oncogenic.
SMAD2	4087	D300G	missense_variant	300	TRUE	FALSE	Likely Oncogenic	Likely Loss-of-function	2017-04-07	SMAD2 encodes a tumor suppressor and transcription factor that is a downstream effector in the TGF-ÃŸ signal transduction pathway. SMAD2 is infrequently mutated in a diverse range of cancers.	The SMAD2 D300G mutation has not specifically been reviewed by the OncoKB team. However, SMAD2 D300H/N are likely oncogenic, and therefore SMAD2 D300G is considered likely oncogenic.
SMAD2	4087	R120*	stop_gained	120	TRUE	FALSE	Likely Oncogenic	Likely Loss-of-function	2017-04-07	SMAD2 encodes a tumor suppressor and transcription factor that is a downstream effector in the TGF-ÃŸ signal transduction pathway. SMAD2 is infrequently mutated in a diverse range of cancers.	The SMAD2 R120* is a truncating mutation in a tumor suppressor gene, and therefore is likely oncogenic.
SMAD2	4087	N361S	missense_variant	361	TRUE	FALSE	Unknown	Unknown	2017-04-07	SMAD2 encodes a tumor suppressor and transcription factor that is a downstream effector in the TGF-ÃŸ signal transduction pathway. SMAD2 is infrequently mutated in a diverse range of cancers.	The SMAD2 N361S mutation has not specifically been reviewed by the OncoKB team, and therefore its biological significance is unknown.
SMAD2	4087	A292V	missense_variant	292	TRUE	FALSE	Unknown	Unknown	2017-04-07	SMAD2 encodes a tumor suppressor and transcription factor that is a downstream effector in the TGF-ÃŸ signal transduction pathway. SMAD2 is infrequently mutated in a diverse range of cancers.	The SMAD2 A292V mutation has not specifically been reviewed by the OncoKB team, and therefore its biological significance is unknown.
SMAD2	4087	R321Q	missense_variant	321	TRUE	TRUE	Likely Oncogenic	Loss-of-function	2017-04-07	SMAD2 encodes a tumor suppressor and transcription factor that is a downstream effector in the TGF-ÃŸ signal transduction pathway. SMAD2 is infrequently mutated in a diverse range of cancers.	The SMAD2 R321Q mutation is likely oncogenic.
SMAD2	4087	S276L	missense_variant	276	TRUE	TRUE	Likely Oncogenic	Likely Loss-of-function	2017-04-07	SMAD2 encodes a tumor suppressor and transcription factor that is a downstream effector in the TGF-ÃŸ signal transduction pathway. SMAD2 is infrequently mutated in a diverse range of cancers.	The SMAD2 S276L mutation is likely oncogenic.
SMAD4	4089	D351H	missense_variant	351	TRUE	TRUE	Likely Oncogenic	Loss-of-function	2017-04-07	SMAD4 encodes a tumor suppressor and transcription factor that is a downstream effector in the TGF-ÃŸ signal transduction pathway. SMAD4 is frequently mutated in pancreatic and colorectal cancer and infrequently mutated in various other cancers.	The SMAD4 D351H mutation is likely oncogenic.
SMAD4	4089	C324Y	missense_variant	324	TRUE	TRUE	Likely Oncogenic	Likely Loss-of-function	2017-04-07	SMAD4 encodes a tumor suppressor and transcription factor that is a downstream effector in the TGF-ÃŸ signal transduction pathway. SMAD4 is frequently mutated in pancreatic and colorectal cancer and infrequently mutated in various other cancers.	The SMAD4 C324Y mutation is likely oncogenic.
SMAD4	4089	G352V	missense_variant	352	TRUE	TRUE	Likely Oncogenic	Likely Loss-of-function	2023-02-02	SMAD4 encodes a tumor suppressor and transcription factor that is a downstream effector in the TGF-ÃŸ signal transduction pathway. SMAD4 is frequently mutated in pancreatic and colorectal cancer and infrequently mutated in various other cancers.	There is no available functional data about the SMAD4 G352V mutation (last reviewed on 02/02/2023). However, it has been identified as a statistically significant hotspot and is likely to be oncogenic.
SMAD4	4089	A406V	missense_variant	406	TRUE	FALSE	Unknown	Unknown	2017-04-07	SMAD4 encodes a tumor suppressor and transcription factor that is a downstream effector in the TGF-ÃŸ signal transduction pathway. SMAD4 is frequently mutated in pancreatic and colorectal cancer and infrequently mutated in various other cancers.	The SMAD4 A406V mutation has not specifically been reviewed by the OncoKB team, and therefore its biological significance is unknown.
SMAD4	4089	R445*	stop_gained	445	TRUE	FALSE	Likely Oncogenic	Likely Loss-of-function	2017-04-07	SMAD4 encodes a tumor suppressor and transcription factor that is a downstream effector in the TGF-ÃŸ signal transduction pathway. SMAD4 is frequently mutated in pancreatic and colorectal cancer and infrequently mutated in various other cancers.	The SMAD4 R445* is a truncating mutation in a tumor suppressor gene, and therefore is likely oncogenic.
SMAD4	4089	R380S	missense_variant	380	TRUE	TRUE	Unknown	Unknown	2017-04-07	SMAD4 encodes a tumor suppressor and transcription factor that is a downstream effector in the TGF-ÃŸ signal transduction pathway. SMAD4 is frequently mutated in pancreatic and colorectal cancer and infrequently mutated in various other cancers.	There is no available functional data about the SMAD4 R380S mutation (last reviewed on 03/10/2017), and therefore its biological significance is unknown.
SMAD4	4089	R135*	stop_gained	135	TRUE	FALSE	Likely Oncogenic	Likely Loss-of-function	2017-04-07	SMAD4 encodes a tumor suppressor and transcription factor that is a downstream effector in the TGF-ÃŸ signal transduction pathway. SMAD4 is frequently mutated in pancreatic and colorectal cancer and infrequently mutated in various other cancers.	The SMAD4 R135* is a truncating mutation in a tumor suppressor gene, and therefore is likely oncogenic.
SMAD4	4089	Q256*	stop_gained	256	TRUE	FALSE	Likely Oncogenic	Likely Loss-of-function	2017-04-07	SMAD4 encodes a tumor suppressor and transcription factor that is a downstream effector in the TGF-ÃŸ signal transduction pathway. SMAD4 is frequently mutated in pancreatic and colorectal cancer and infrequently mutated in various other cancers.	The SMAD4 Q256* is a truncating mutation in a tumor suppressor gene, and therefore is likely oncogenic.
SMAD4	4089	W268*	stop_gained	268	TRUE	FALSE	Likely Oncogenic	Likely Loss-of-function	2017-04-07	SMAD4 encodes a tumor suppressor and transcription factor that is a downstream effector in the TGF-ÃŸ signal transduction pathway. SMAD4 is frequently mutated in pancreatic and colorectal cancer and infrequently mutated in various other cancers.	The SMAD4 W268* is a truncating mutation in a tumor suppressor gene, and therefore is likely oncogenic.
SMAD4	4089	Q311*	stop_gained	311	TRUE	FALSE	Likely Oncogenic	Likely Loss-of-function	2017-04-07	SMAD4 encodes a tumor suppressor and transcription factor that is a downstream effector in the TGF-ÃŸ signal transduction pathway. SMAD4 is frequently mutated in pancreatic and colorectal cancer and infrequently mutated in various other cancers.	The SMAD4 Q311* is a truncating mutation in a tumor suppressor gene, and therefore is likely oncogenic.
SMAD4	4089	E330*	stop_gained	330	TRUE	FALSE	Likely Oncogenic	Likely Loss-of-function	2017-04-07	SMAD4 encodes a tumor suppressor and transcription factor that is a downstream effector in the TGF-ÃŸ signal transduction pathway. SMAD4 is frequently mutated in pancreatic and colorectal cancer and infrequently mutated in various other cancers.	The SMAD4 E330* is a truncating mutation in a tumor suppressor gene, and therefore is likely oncogenic.
SMAD4	4089	R361H	missense_variant	361	TRUE	TRUE	Likely Oncogenic	Loss-of-function	2017-04-07	SMAD4 encodes a tumor suppressor and transcription factor that is a downstream effector in the TGF-ÃŸ signal transduction pathway. SMAD4 is frequently mutated in pancreatic and colorectal cancer and infrequently mutated in various other cancers.	The SMAD4 R361H mutation is likely oncogenic.
NA	NA	NA	NA	NA	FALSE	FALSE	Unknown	Unknown	2024-06-04	NA	NA
SMAD4	4089	D355G	missense_variant	355	TRUE	TRUE	Likely Oncogenic	Unknown	2023-02-03	SMAD4 encodes a tumor suppressor and transcription factor that is a downstream effector in the TGF-ÃŸ signal transduction pathway. SMAD4 is frequently mutated in pancreatic and colorectal cancer and infrequently mutated in various other cancers.	There is no available functional data about the SMAD4 D355G mutation (last reviewed on 02/03/2023). However, it has been identified as a statistically significant hotspot and is likely to be oncogenic.
SMAD4	4089	L540R	missense_variant	540	TRUE	FALSE	Unknown	Unknown	2017-04-07	SMAD4 encodes a tumor suppressor and transcription factor that is a downstream effector in the TGF-ÃŸ signal transduction pathway. SMAD4 is frequently mutated in pancreatic and colorectal cancer and infrequently mutated in various other cancers.	The SMAD4 L540R mutation has not specifically been reviewed by the OncoKB team, and therefore its biological significance is unknown.
SMAD4	4089	R361G	missense_variant	361	TRUE	TRUE	Likely Oncogenic	Likely Loss-of-function	2023-01-10	SMAD4 encodes a tumor suppressor and transcription factor that is a downstream effector in the TGF-ÃŸ signal transduction pathway. SMAD4 is frequently mutated in pancreatic and colorectal cancer and infrequently mutated in various other cancers.	The SMAD4 R361G mutation is likely oncogenic.
SMAD4	4089	D537Y	missense_variant	537	TRUE	TRUE	Oncogenic	Loss-of-function	2017-04-07	SMAD4 encodes a tumor suppressor and transcription factor that is a downstream effector in the TGF-ÃŸ signal transduction pathway. SMAD4 is frequently mutated in pancreatic and colorectal cancer and infrequently mutated in various other cancers.	The SMAD4 D537Y mutation is known to be oncogenic.
SMAD4	4089	K340N	missense_variant	340	TRUE	FALSE	Unknown	Unknown	2017-04-07	SMAD4 encodes a tumor suppressor and transcription factor that is a downstream effector in the TGF-ÃŸ signal transduction pathway. SMAD4 is frequently mutated in pancreatic and colorectal cancer and infrequently mutated in various other cancers.	The SMAD4 K340N mutation has not specifically been reviewed by the OncoKB team, and therefore its biological significance is unknown.
SMAD4	4089	V137A	missense_variant	137	TRUE	FALSE	Unknown	Unknown	2017-04-07	SMAD4 encodes a tumor suppressor and transcription factor that is a downstream effector in the TGF-ÃŸ signal transduction pathway. SMAD4 is frequently mutated in pancreatic and colorectal cancer and infrequently mutated in various other cancers.	The SMAD4 V137A mutation has not specifically been reviewed by the OncoKB team, and therefore its biological significance is unknown.
SMAD4	4089	R441C	missense_variant	441	TRUE	FALSE	Unknown	Unknown	2017-04-07	SMAD4 encodes a tumor suppressor and transcription factor that is a downstream effector in the TGF-ÃŸ signal transduction pathway. SMAD4 is frequently mutated in pancreatic and colorectal cancer and infrequently mutated in various other cancers.	The SMAD4 R441C mutation has not specifically been reviewed by the OncoKB team. While SMAD4 R441P is likely neutral, the oncogenic effect of SMAD4 R441C is unknown.
SMAD4	4089	E53*	stop_gained	53	TRUE	FALSE	Likely Oncogenic	Likely Loss-of-function	2017-04-07	SMAD4 encodes a tumor suppressor and transcription factor that is a downstream effector in the TGF-ÃŸ signal transduction pathway. SMAD4 is frequently mutated in pancreatic and colorectal cancer and infrequently mutated in various other cancers.	The SMAD4 E53* is a truncating mutation in a tumor suppressor gene, and therefore is likely oncogenic.
SMAD4	4089	Y353H	missense_variant	353	TRUE	FALSE	Likely Oncogenic	Likely Loss-of-function	2020-06-10	SMAD4 encodes a tumor suppressor and transcription factor that is a downstream effector in the TGF-ÃŸ signal transduction pathway. SMAD4 is frequently mutated in pancreatic and colorectal cancer and infrequently mutated in various other cancers.	The SMAD4 Y353H mutation has been identified as a statistically significant hotspot and is likely to be oncogenic.
SMAD4	4089	E538K	missense_variant	538	TRUE	FALSE	Unknown	Unknown	2017-04-07	SMAD4 encodes a tumor suppressor and transcription factor that is a downstream effector in the TGF-ÃŸ signal transduction pathway. SMAD4 is frequently mutated in pancreatic and colorectal cancer and infrequently mutated in various other cancers.	The SMAD4 E538K mutation has not specifically been reviewed by the OncoKB team, and therefore its biological significance is unknown.
TP53	7157	T125M	missense_variant	125	TRUE	TRUE	Inconclusive	Inconclusive	2023-02-24	TP53, a tumor suppressor in the DNA damage pathway, is the most frequently mutated gene in cancer.	There is conflicting and/or weak data describing the biological significance of the TP53 T125M mutation.
TP53	7157	R249S	missense_variant	249	TRUE	TRUE	Likely Oncogenic	Likely Loss-of-function	2022-11-04	TP53, a tumor suppressor in the DNA damage pathway, is the most frequently mutated gene in cancer.	The TP53 R249S mutation is likely oncogenic.
TP53	7157	Q52*	stop_gained	52	TRUE	FALSE	Likely Oncogenic	Likely Loss-of-function	2017-06-13	TP53, a tumor suppressor in the DNA damage pathway, is the most frequently mutated gene in cancer.	The TP53 Q52* is a truncating mutation in a tumor suppressor gene, and therefore is likely oncogenic.
TP53	7157	R342*	stop_gained	342	TRUE	FALSE	Likely Oncogenic	Likely Loss-of-function	2017-06-13	TP53, a tumor suppressor in the DNA damage pathway, is the most frequently mutated gene in cancer.	The TP53 R342* is a truncating mutation in a tumor suppressor gene, and therefore is likely oncogenic.
TP53	7157	E204*	stop_gained	204	TRUE	FALSE	Likely Oncogenic	Likely Loss-of-function	2017-06-13	TP53, a tumor suppressor in the DNA damage pathway, is the most frequently mutated gene in cancer.	The TP53 E204* is a truncating mutation in a tumor suppressor gene, and therefore is likely oncogenic.
TP53	7157	V272M	missense_variant	272	TRUE	TRUE	Likely Oncogenic	Likely Loss-of-function	2022-12-07	TP53, a tumor suppressor in the DNA damage pathway, is the most frequently mutated gene in cancer.	The TP53 V272M mutation is likely oncogenic.
TP53	7157	S215N	missense_variant	215	TRUE	TRUE	Likely Oncogenic	Likely Loss-of-function	2023-02-01	TP53, a tumor suppressor in the DNA damage pathway, is the most frequently mutated gene in cancer.	The TP53 S215N mutation is likely oncogenic.
TP53	7157	R273C	missense_variant	273	TRUE	TRUE	Likely Oncogenic	Likely Loss-of-function	2017-04-20	TP53, a tumor suppressor in the DNA damage pathway, is the most frequently mutated gene in cancer.	The TP53 R273C mutation is likely oncogenic.
TP53	7157	R248Q	missense_variant	248	TRUE	TRUE	Likely Oncogenic	Likely Loss-of-function	2017-04-20	TP53, a tumor suppressor in the DNA damage pathway, is the most frequently mutated gene in cancer.	The TP53 R248Q mutation is likely oncogenic.
TP53	7157	R196*	stop_gained	196	TRUE	FALSE	Likely Oncogenic	Likely Loss-of-function	2017-06-13	TP53, a tumor suppressor in the DNA damage pathway, is the most frequently mutated gene in cancer.	The TP53 R196* is a truncating mutation in a tumor suppressor gene, and therefore is likely oncogenic.
TP53	7157	R248W	missense_variant	248	TRUE	TRUE	Likely Oncogenic	Loss-of-function	2022-09-16	TP53, a tumor suppressor in the DNA damage pathway, is the most frequently mutated gene in cancer.	The TP53 R248W mutation is likely oncogenic.
TP53	7157	E224D	missense_variant	224	TRUE	FALSE	Likely Oncogenic	Likely Loss-of-function	2023-03-24	TP53, a tumor suppressor in the DNA damage pathway, is the most frequently mutated gene in cancer.	The TP53 E224D mutation is likely oncogenic.
TP53	7157	C277F	missense_variant	277	TRUE	TRUE	Likely Oncogenic	Likely Loss-of-function	2022-12-13	TP53, a tumor suppressor in the DNA damage pathway, is the most frequently mutated gene in cancer.	The TP53 C277F mutation is likely oncogenic.
TP53	7157	R273H	missense_variant	273	TRUE	TRUE	Oncogenic	Loss-of-function	2022-09-28	TP53, a tumor suppressor in the DNA damage pathway, is the most frequently mutated gene in cancer.	The TP53 R273H mutation is known to be oncogenic.
TP53	7157	E286G	missense_variant	286	TRUE	TRUE	Likely Oncogenic	Likely Loss-of-function	2023-01-17	TP53, a tumor suppressor in the DNA damage pathway, is the most frequently mutated gene in cancer.	The TP53 E286G mutation is likely oncogenic.
TP53	7157	E285K	missense_variant	285	TRUE	TRUE	Likely Oncogenic	Likely Loss-of-function	2017-07-19	TP53, a tumor suppressor in the DNA damage pathway, is the most frequently mutated gene in cancer.	The TP53 E285K mutation is likely oncogenic.
TP53	7157	Q192*	stop_gained	192	TRUE	FALSE	Likely Oncogenic	Likely Loss-of-function	2017-06-13	TP53, a tumor suppressor in the DNA damage pathway, is the most frequently mutated gene in cancer.	The TP53 Q192* is a truncating mutation in a tumor suppressor gene, and therefore is likely oncogenic.
TP53	7157	R282W	missense_variant	282	TRUE	TRUE	Likely Oncogenic	Likely Loss-of-function	2017-04-20	TP53, a tumor suppressor in the DNA damage pathway, is the most frequently mutated gene in cancer.	The TP53 R282W mutation is likely oncogenic.
TP53	7157	R175H	missense_variant	175	TRUE	TRUE	Oncogenic	Loss-of-function	2022-08-09	TP53, a tumor suppressor in the DNA damage pathway, is the most frequently mutated gene in cancer.	The TP53 R175H mutation is known to be oncogenic.
TP53	7157	G266E	missense_variant	266	TRUE	TRUE	Likely Oncogenic	Likely Loss-of-function	2022-11-04	TP53, a tumor suppressor in the DNA damage pathway, is the most frequently mutated gene in cancer.	The TP53 G266E mutation is likely oncogenic.
TP53	7157	R213*	stop_gained	213	TRUE	FALSE	Likely Oncogenic	Likely Loss-of-function	2017-06-13	TP53, a tumor suppressor in the DNA damage pathway, is the most frequently mutated gene in cancer.	The TP53 R213* is a truncating mutation in a tumor suppressor gene, and therefore is likely oncogenic.
TP53	7157	G245D	missense_variant	245	TRUE	TRUE	Likely Oncogenic	Likely Loss-of-function	2017-05-18	TP53, a tumor suppressor in the DNA damage pathway, is the most frequently mutated gene in cancer.	The TP53 G245D mutation is likely oncogenic.
TP53	7157	R213L	missense_variant	213	TRUE	TRUE	Likely Oncogenic	Likely Loss-of-function	2022-09-15	TP53, a tumor suppressor in the DNA damage pathway, is the most frequently mutated gene in cancer.	There is no available functional data about the TP53 R213L mutation (last reviewed on 10/02/2016). However, TP53 R213Q is likely oncogenic, and therefore TP53 R213L is considered likely oncogenic.
TP53	7157	Y163H	missense_variant	163	TRUE	TRUE	Likely Oncogenic	Likely Loss-of-function	2022-12-13	TP53, a tumor suppressor in the DNA damage pathway, is the most frequently mutated gene in cancer.	The TP53 Y163H mutation is likely oncogenic.
TP53	7157	R283P	missense_variant	283	TRUE	FALSE	Likely Oncogenic	Likely Loss-of-function	2017-04-20	TP53, a tumor suppressor in the DNA damage pathway, is the most frequently mutated gene in cancer.	The TP53 R283P mutation has not specifically been reviewed by the OncoKB team. However, TP53 R283Q is likely oncogenic, and therefore TP53 R283P is considered likely oncogenic.
TP53	7157	R213L	missense_variant	213	TRUE	TRUE	Likely Oncogenic	Likely Loss-of-function	2022-09-15	TP53, a tumor suppressor in the DNA damage pathway, is the most frequently mutated gene in cancer.	There is no available functional data about the TP53 R213L mutation (last reviewed on 10/02/2016). However, TP53 R213Q is likely oncogenic, and therefore TP53 R213L is considered likely oncogenic.
TP53	7157	K132Q	missense_variant	132	TRUE	TRUE	Likely Oncogenic	Likely Loss-of-function	2023-02-02	TP53, a tumor suppressor in the DNA damage pathway, is the most frequently mutated gene in cancer.	The TP53 K132Q mutation is likely oncogenic.
TP53	7157	R306*	stop_gained	306	TRUE	FALSE	Likely Oncogenic	Likely Loss-of-function	2017-06-13	TP53, a tumor suppressor in the DNA damage pathway, is the most frequently mutated gene in cancer.	The TP53 R306* is a truncating mutation in a tumor suppressor gene, and therefore is likely oncogenic.
TP53	7157	Y234H	missense_variant	234	TRUE	TRUE	Likely Oncogenic	Likely Loss-of-function	2022-11-05	TP53, a tumor suppressor in the DNA damage pathway, is the most frequently mutated gene in cancer.	The TP53 Y234H mutation is likely oncogenic.
TP53	7157	G245S	missense_variant	245	TRUE	TRUE	Oncogenic	Loss-of-function	2017-04-20	TP53, a tumor suppressor in the DNA damage pathway, is the most frequently mutated gene in cancer.	The TP53 G245S mutation is known to be oncogenic.
TP53	7157	R158L	missense_variant	158	TRUE	TRUE	Likely Oncogenic	Likely Loss-of-function	2022-10-03	TP53, a tumor suppressor in the DNA damage pathway, is the most frequently mutated gene in cancer.	The TP53 R158L mutation is likely oncogenic.
TP53	7157	Y234C	missense_variant	234	TRUE	TRUE	Likely Oncogenic	Loss-of-function	2022-11-07	TP53, a tumor suppressor in the DNA damage pathway, is the most frequently mutated gene in cancer.	The TP53 Y234C mutation is likely oncogenic.
TP53	7157	P190L	missense_variant	190	TRUE	TRUE	Likely Oncogenic	Likely Loss-of-function	2023-02-03	TP53, a tumor suppressor in the DNA damage pathway, is the most frequently mutated gene in cancer.	The TP53 P190L mutation is likely oncogenic.
NA	NA	NA	NA	NA	FALSE	FALSE	Unknown	Unknown	2024-06-04	NA	NA
TP53	7157	S94*	stop_gained	94	TRUE	FALSE	Likely Oncogenic	Likely Loss-of-function	2017-06-13	TP53, a tumor suppressor in the DNA damage pathway, is the most frequently mutated gene in cancer.	The TP53 S94* is a truncating mutation in a tumor suppressor gene, and therefore is likely oncogenic.
TP53	7157	X187_splice	splice_donor_variant	187	TRUE	TRUE	Likely Oncogenic	Likely Loss-of-function	2023-02-02	TP53, a tumor suppressor in the DNA damage pathway, is the most frequently mutated gene in cancer.	There is no available functional data about the TP53 X187_splice alteration (last reviewed on 02/02/2023). However, it has been identified as a statistically significant hotspot and is likely to be oncogenic.
TP53	7157	E286K	missense_variant	286	TRUE	TRUE	Likely Oncogenic	Loss-of-function	2017-04-20	TP53, a tumor suppressor in the DNA damage pathway, is the most frequently mutated gene in cancer.	The TP53 E286K mutation is likely oncogenic.
TP53	7157	V218L	missense_variant	218	TRUE	TRUE	Likely Neutral	Likely Neutral	2023-02-24	TP53, a tumor suppressor in the DNA damage pathway, is the most frequently mutated gene in cancer.	The TP53 V218L mutation is likely neutral.
TP53	7157	R273L	missense_variant	273	TRUE	TRUE	Likely Oncogenic	Loss-of-function	2017-04-20	TP53, a tumor suppressor in the DNA damage pathway, is the most frequently mutated gene in cancer.	The TP53 R273L mutation is likely oncogenic.
TP53	7157	S166*	stop_gained	166	TRUE	FALSE	Likely Oncogenic	Likely Loss-of-function	2017-06-13	TP53, a tumor suppressor in the DNA damage pathway, is the most frequently mutated gene in cancer.	The TP53 S166* is a truncating mutation in a tumor suppressor gene, and therefore is likely oncogenic.
TP53	7157	A159D	missense_variant	159	TRUE	TRUE	Inconclusive	Inconclusive	2023-02-02	TP53, a tumor suppressor in the DNA damage pathway, is the most frequently mutated gene in cancer.	There is conflicting and/or weak data describing the biological significance of the TP53 A159D mutation.
TP53	7157	E51*	stop_gained	51	TRUE	FALSE	Likely Oncogenic	Likely Loss-of-function	2017-06-13	TP53, a tumor suppressor in the DNA damage pathway, is the most frequently mutated gene in cancer.	The TP53 E51* is a truncating mutation in a tumor suppressor gene, and therefore is likely oncogenic.
TP53	7157	P309S	missense_variant	309	TRUE	FALSE	Unknown	Unknown	2017-04-20	TP53, a tumor suppressor in the DNA damage pathway, is the most frequently mutated gene in cancer.	The TP53 P309S mutation has not specifically been reviewed by the OncoKB team, and therefore its biological significance is unknown.
TP53	7157	S127P	missense_variant	127	TRUE	TRUE	Likely Oncogenic	Likely Loss-of-function	2023-02-03	TP53, a tumor suppressor in the DNA damage pathway, is the most frequently mutated gene in cancer.	The TP53 S127P mutation is likely oncogenic.
TP53	7157	S241F	missense_variant	241	TRUE	TRUE	Likely Oncogenic	Likely Loss-of-function	2022-12-07	TP53, a tumor suppressor in the DNA damage pathway, is the most frequently mutated gene in cancer.	The TP53 S241F mutation is likely oncogenic.
TP53	7157	H179R	missense_variant	179	TRUE	TRUE	Likely Oncogenic	Loss-of-function	2017-04-20	TP53, a tumor suppressor in the DNA damage pathway, is the most frequently mutated gene in cancer.	The TP53 H179R mutation is likely oncogenic.
TP53	7157	C176Y	missense_variant	176	TRUE	TRUE	Likely Oncogenic	Likely Loss-of-function	2023-01-17	TP53, a tumor suppressor in the DNA damage pathway, is the most frequently mutated gene in cancer.	The TP53 C176Y mutation is likely oncogenic.
TP53	7157	K132T	missense_variant	132	TRUE	TRUE	Likely Oncogenic	Likely Loss-of-function	2023-02-02	TP53, a tumor suppressor in the DNA damage pathway, is the most frequently mutated gene in cancer.	The TP53 K132T mutation is likely oncogenic.
1 Whether the gene has been curated by the OncoKB Team (TRUE) or not (FALSE)
2 Whether the variant has been curated by the OncoKB Team (TRUE) or not (FALSE). Note: when a variant does not exist, it may still have annotations.

## Sheet: Supplementary Table 10
Supplementary Table S10. Protein domains description.
Pfam domain	Domain name	Domain description	Pfam entry	Gene	Protein
APC_15aa	APC 15 residues motif	Motives involved in beta-catenin binding activity along with APC_r domains. (Nakagawa et al., 1998, PMID: 9823329).	PF05972	APC	Adenomatous polyposis coli protein
APC_u	APC unstructured regions	Unstructured or semi-unstructured sequence domains with ungnown function	PF16629;PF16630;PF16633;PF16634;PF16635;PF16636
APC_N_CC	Coiled-coil N-terminus of APC	Dimerisation domain participating in the regulation of beta-catenin cellular levels. (Day and Alber, 2000 - PMID: 10926498).	PF16689
APC_rep	Adenomatous polyposis coli (APC) repeat	Domain mediating the interaction with the APC-stimulated guanine nucleotide-exchange factor (Asef). (Ahang et al., 2011 - PMID: 21788986).	PF18797
ARM	Armadillo/beta-catenin-like repeat	Protein-protein interaction domain of the armadillo family. (Huber et al., 1997 - PMID: 9298899).	PF00514
EB1_binding	EB-1 Binding Domain	Domain mediating the interaction with the microtubule-associating protein EB-1. (Dikovskaya et al., 2001 - PMID: 11514192).	PF05937
APC_basic	APC basic domain	Domain mediating the interaction with microtubules with high proportions of positively charged amino acids. (Deka et al., 1998 - PMID 9654054).	PF05956
Suppressor_APC	Adenomatous polyposis coli tumour suppressor protein	Domain with nuclear export activity (Tickenbrock et al., 2002 - PMID12070164)	PF11414
SAMP	SAMP Motif	These motifs bind Axin (Nakagawa et al., 1998 - PMID: 9823329).	PF05924
APC_r	APC repeat, 20-residues motif	These repeats bind beta-catenin and participate in its degradation (Nakagawa et al., 1998 - PMID: 9823329).	PF05923
EB1_binding	EB-1 Binding Domain	Domain responsible for the binding of APC to the microtubule-associating protein EB1 (Dikovskaya et al., 2001 - PMID: 11514192).	PF05937
DUF3518	SWI/SNF-like complex subunit BAF250/Osa	part of the SWI/SNF-like ATP-dependent chromatin remodelling complex that regulates nucleosome remodelling and gene expression (Li et al., 2010 - PMID: 20086098	PF12031	ARID1A	AT-rich interactive domain-containing protein 1A
ARID	ARID/BRIGHT DNA binding domain	Domain with biding activity of AT-rich DNA motifs (Gregory et al., 1996 - PMID: 8622680).	PF01388
Pkinase	Protein kinase domain	Domain with protein kinase activity (Hanks and Quinn, 1991 - PMID: 1956325).	PF00069	BRAF	Serine/threonine-protein kinase B-raf
Raf_RBD	Raf-like Ras-binding domain	Domain responsible for the GTP-dependent binding of Ras (Ponting, 1999 - PMID: 10606204).	PF02196
C1	C1 domain	Putative zinc binding domain (Azzi et al., 1992 - PMID: 1396661)	SM00109
PKc_like	Catalytic domain of the Protein Kinase superfamily	Domain with catalitic activity (Hanks and Hunter, 1995 - PMID: 16269279).	CD13968
ARM	Armadillo/beta-catenin-like repeat	Protein-protein interaction domain of the armadillo family. (Huber et al., 1997 - PMID: 9298899).	PF00514	CTNNB1	Catenin beta-1
H_N_K_Ras_like	Ras family	Domain with GTPase activity (Stenmark and Olkkonen, 2001 - PMID: 11387043).	PF00071	KRAS	GTPase KRas
RasGAP_Neurofibromin	Ras-GTPase Activating Domain of neurofibromin	Inhibition of low molecular weight G proteins (i.e.Ras) by stimulating their intrinsic GTPase activity (Le and Parada, 2007 - PMID: 17297459).	CD05130	NF1	Neurofibromin
SEC14	SEC14	Sec14p-like lipid-binding domain. SEC14 domains are known to associate with G protein beta/gamma subunits (Arsvind et sl., 1999 - PMID: 10209105).	CD00170
PI3Kc_IA_alpha	Phosphatidylinositol 3- and 4-kinase	Catalitic domain (Crespo, 2002 - PMID: 12456783).	PF00454	PIK3CA	Phosphatidylinositol 4,5-bisphosphate 3-kinase catalytic subunit alpha isoform
PI3Ka_I	Phosphoinositide 3-kinase family, accessory domain (PIK domain)	Domain involved in substrate presentation (Flanagan et al., 1993 - PMID: 8248783).	PF00613
PI3K_rbd	PI3-kinase family, ras-binding domain	Domain with Ras-binding activity (Kodaki et al., 1994 - PMID: 7820549).	PF00794
PI3Kc	Phosphoinositide 3-kinase, catalytic domain	Domain with catalitic activity of PI3K (Walker et al., 1999 - PMID: 10580505).	SM00146
PI3K_p85B	PI3-kinase family, p85-binding domain	N-terminal adaptor-binding domain (ABD) that binds to p85 (Huang et al., 2007 - PMID: 18079394).	PF02192
C2_PI3K_class_I_alpha	C2 domain present in class I alpha phosphatidylinositol 3-kinases (PI3Ks)	Domains with signal transduction and/or membrane trafficking functions (Rizo and Sudhol, 1998 - PMID: 9632630 )	CD08398
MH2_SMAD_2_3	MH2 domain	Protein-protein interaction domain (Lee-Hoeflich, 2001 - PMID: 11532220).	PF03166	SMAD2	Mothers against decapentaplegic homolog 2
MH1_SMAD_2_3	MH1 domain	Protein-protein and protein-DNA interaction domain (Lee-Hoeflich, 2001 - PMID: 11532220).	PF03165
MH2_SMAD_4	MH2 domain	Protein-protein interaction domain (Lee-Hoeflich, 2001 - PMID: 11532220).	PF03166	SMAD4	Mothers against decapentaplegic homolog 4
MH1_SMAD_4	MH1 domain	Protein-protein and protein-DNA interaction domain (Lee-Hoeflich, 2001 - PMID: 11532220).	PF03165
p53	P53 DNA-binding domain	DNA-binding domain of p53 (Pavletich et al., 1993 - PMID: 8276238).	PF00870	TP53	Cellular tumor antigen p53
p53_TAD	P53 transactivation motif	Regulatory domain of p53 transcriptional activity and MDM2 binding (Kussie et al., 1996 - PMID: 8875929).	PF08563
P53_tetramer	P53 tetramerisation motif	Domain involved in DNA binding, protein-protein interactions, post-translational modifications, and p53 degradation (Chene, 2001 - PMID: 11420672).	PF07710

[truncated: 2 more sheets: Supplementary Table 11, Supplementary Table 12]
